# Supplementary material for: A metal-free synthesis of pyrimidines from amidines with α,β-unsaturated ketonesviatandem [3 + 3] annulation and visible-light-enabled photo-oxidation
Source: Royal Society of Chemistry journal article supplement (doi:10.1039/d2ob02298b), 2023-01-01
Supplement: d2ob02298b1.pdf [file d2ob02298b1.pdf]

## Supplementary Materials

# **A metal-free synthesis of pyrimidines from amidines with $\alpha$ , $\beta$ -unsaturated ketones *via* tandem [3+3] annulation and visible light enabled photo-oxidation**

Jinshan Liu, Jiatian Zhuo, Qi Tan, Min Zhou, Lin Ma, Min Zhang \*

School of Chemistry and Chemical Engineering, Guangxi University, Nanning,  
Guangxi 530004, China

Guangxi Colleges and Universities Key Laboratory of Applied Chemistry Technology  
and Resource Development, Guangxi University, Nanning, Guangxi 530004, China

Email: [cheminzhang@gxu.edu.cn](mailto:cheminzhang@gxu.edu.cn); [zhangminnju@hotmail.com](mailto:zhangminnju@hotmail.com).

## Contents

|                                                            |    |
|------------------------------------------------------------|----|
| 1. General information .....                               | 3  |
| 2. Typical procedure for 3a .....                          | 3  |
| 3. Syntheses of starting materials.....                    | 4  |
| 4. Mehchanistic study .....                                | 6  |
| 5. Conditions optimization and reaction scope details..... | 8  |
| 6. The spectral data .....                                 | 14 |
| 7. The NMR Charts.....                                     | 25 |
| 8. References.....                                         | 58 |

## 1. General information

All chemicals were purchased from commercial suppliers and used without further purification unless specially noted. Thin-layer chromatography (TLC) was performed using silica gel GF254 plates. Column chromatography was performed on silica gel (300 ~ 400 mesh) with petroleum ether/ethyl acetate for the gradient elution. All melting points were measured without correction. Nuclear magnetic resonance (NMR) spectra were recorded on a Bruker Avance III HD 600 or HD 500 spectrometer at 600/500 MHz ( $^1\text{H}$  NMR) and 151/125 MHz ( $^{13}\text{C}$  NMR) respectively. The chemical shifts are reported relative to  $\text{CHCl}_3$  ( $\delta = 7.26$  for  $^1\text{H}$  NMR and  $\delta = 77.16$  for  $^{13}\text{C}$  NMR).

## 2. Typical procedure for **3a**

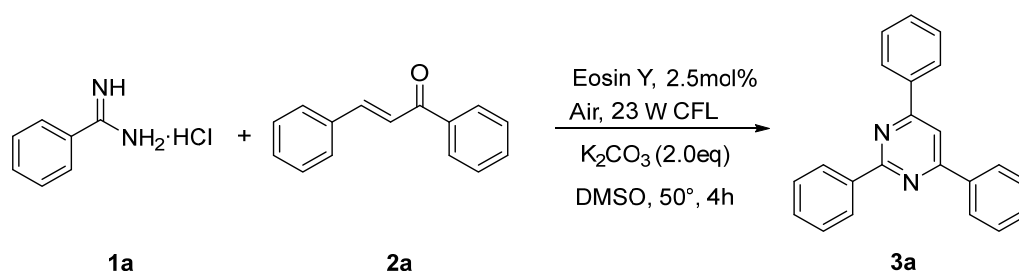

A mixture of benzamidine hydrochloride **1a** (15.6 mg, 0.10 mmol), chalcone **2a** (42.0 mg, 0.20 mmol) and  $\text{K}_2\text{CO}_3$  (13.6 mg, 0.10 mmol) was dissolved in DMSO (4.0 mL) and put in a reaction vessel open to air and stirred at 50 °C for 3 h until the full consumption of **1a** by TLC monitoring (eluent chloroform: methanol: TEA = 50: 16: 5). Then Eosin Y (1.70 mg, 0.0025 mmol) was added in and irradiated under four 23 W CFLs at 40 °C for 1 h to complete the transformation. The mixture was then diluted with 10 mL de-ionized water (turn orange) and extracted by 20 mL EtOAc for three times. The organic phase was combined, dried over  $\text{Na}_2\text{SO}_4$  and filtered. The solvent was removed under vacuum and the residue was put on silica gel chromatography and eluted with EA/PE (0.5:100) to give **3a** as a white solid (25.0 mg, 81%).

### 3. Syntheses of starting materials

#### 3.1 Synthesis of unsaturated ketones<sup>1</sup>

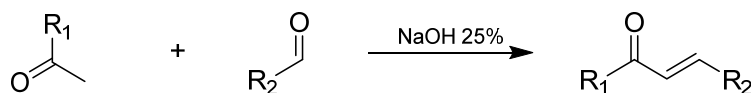

Preparation of chalcone

To a solution of suitable ketone (25 mmol) and aldehyde (30 mmol) in ethanol (15 mL), aqueous sodium hydroxide (25 mL, 2.5 M) was added dropwisely at 0 °C. The reaction mixture was further stirred at room temperature until the completion of reaction (detected by TLC). The reaction mixture was then filtered and washed with ethanol-water solution (1/1) and dried. The precipitate was recrystallized in methanol to obtain pure unsaturated ketone product. The unsaturated ketones (**2a-2j**, **2l-2o**) were synthesized using this method.

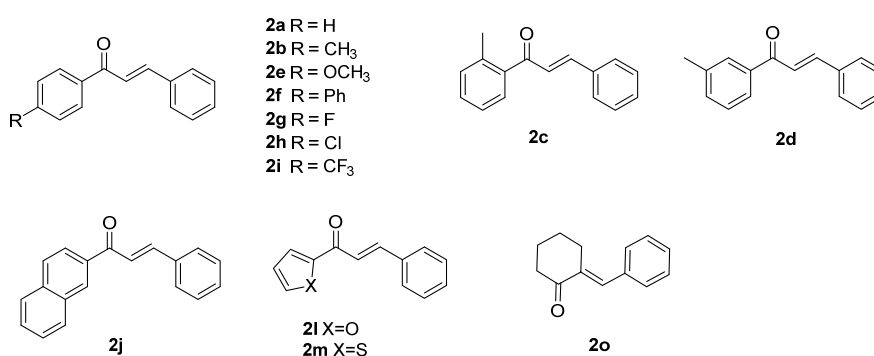

#### Synthesis of (*E*)-3-phenyl-1-(pyridin-2-yl)prop-2-en-1-one (**2k**)<sup>2</sup>

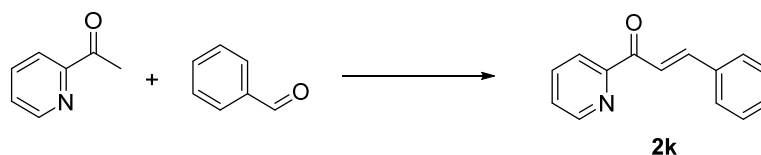

Seventeen millimoles of the 2-acetylpyridine and 16.5 mmol of the benzaldehyde were introduced in 100 mL of water at temperatures below 5 °C. The mixture was shaken thoroughly in order to obtain a finely dispersed emulsion. Ten milliliters of a 10% sodium hydroxide solution were added. The mixture was again shaken and left overnight undisturbed at 4 °C. The solution should not be stirred since this results in a phase separation and lower yields. The product was separated as an oil that solidified upon shaking. Filtration and washing with water gave the almost pure product **2k** in 95%

yield.

### 3.2 Synthesis of benzamidine hydrochlorides<sup>3</sup>

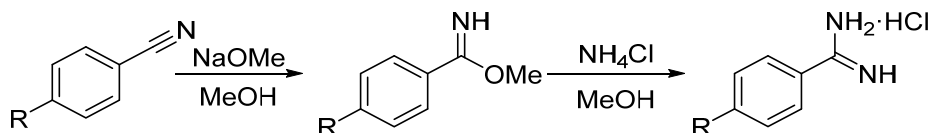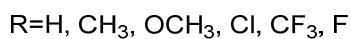

Synthesis of benzamidine hydrochlorides.

To a 250 mL round-bottom flask charged with 100 mL of CH<sub>3</sub>OH, 0.4 g sodium was added. After the dissolution of sodium, 0.1 mol of the appropriate nitrile was added in. The contents of the flask were protected from moisture and stirred magnetically for 48 h at room temperature. Then, 0.1 mol of NH<sub>4</sub>Cl was added and stirring was continued for 24 h. Unreacted NH<sub>4</sub>Cl was filtered, and methanol was stripped from the filtrate to afford the crude products. The product was then washed free of unreacted aryl nitriles with ether and dried to give arylamidine hydrochloride in 60-80% yield.

## 4. Mechanistic study

### 4.1 Fluorescence quenching experiment

The fluorescence spectrum of the Eosin Y was recorded on a spectrofluorimeter (RF-6000, SHIMADZU). Emission and excitation spectra were corrected for source intensity (lamp and grating) by standard correction curves. The excitation wavelength was fixed at 540 nm. In the blank experiment, Eosin Y solution of DMSO was recorded in the concentration of  $1 \times 10^{-5}$  M. Subsequently, different amounts of dihydropyrimidine **4a** was dissolved in the solution, and the resulting changes in fluorescence intensity in the concentrations of  $6 \times 10^{-5}$  M,  $12 \times 10^{-5}$  M,  $18 \times 10^{-5}$  M,  $24 \times 10^{-5}$  M were collected, please see Figure S1. The Stern-Volmer plot gives a  $K_{sv}$  of  $11934 \text{ M}^{-1}$  (Figure S2). According to the results, the dihydropyrimidine **4a** exhibited evident quenching effect to the fluorescent emission intensity of Eosin Y, supporting that dihydropyrimidine was the energy acceptor of excited Eosin Y during the reported photocatalytic reactions.

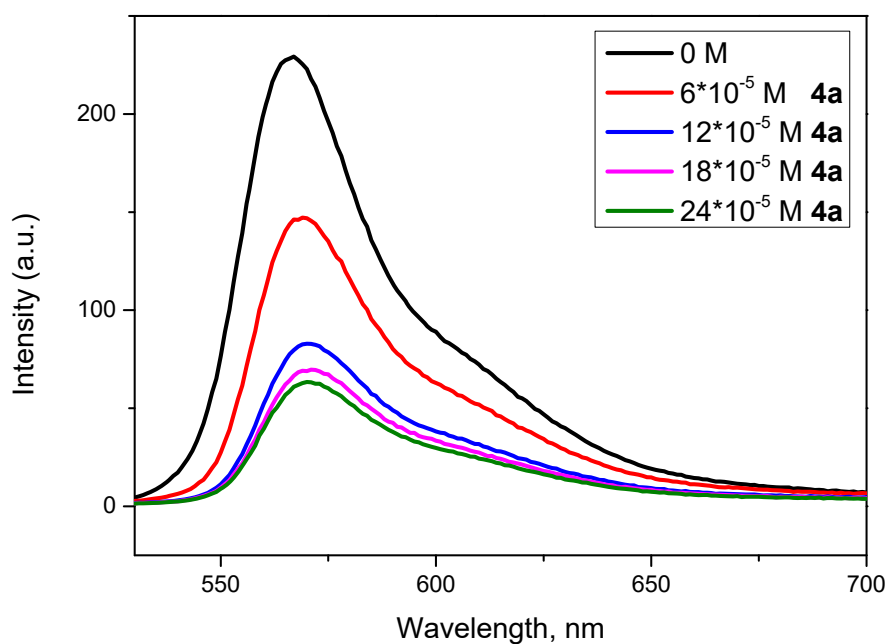

Figure S1

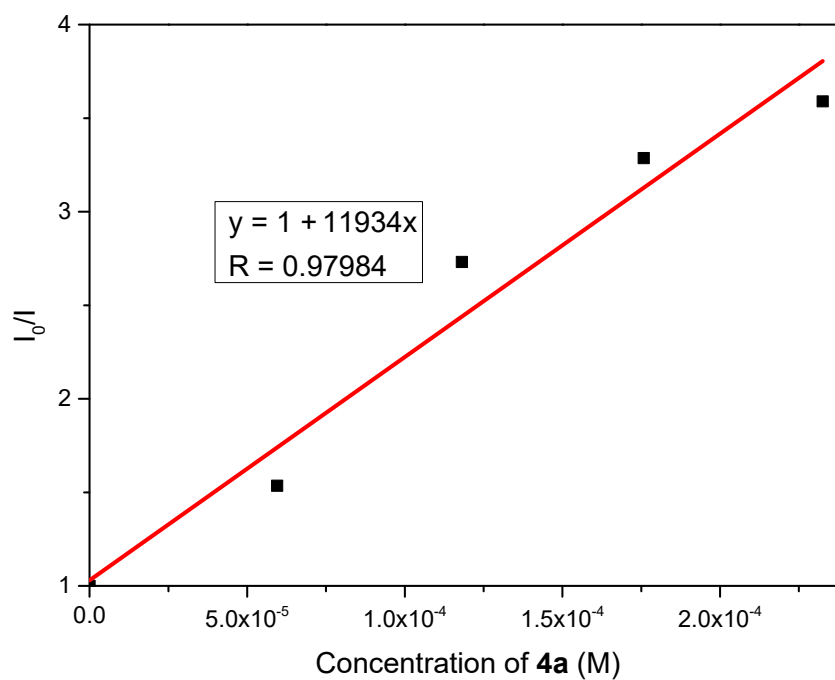

**Figure S2** Stern-Volmer plot of the fluorescence quenching of Eosin Y by **4a** in DMSO.

#### 4.2 Benzylic radical capture

Benzylic radical IV in Scheme 3 could be captured by TEMPO and gave a weak signal in HRMS at 465.2731 which was assigned to  $M^+$  (Calculated for  $C_{31}H_{35}N_3O^+$ : 465.2780).

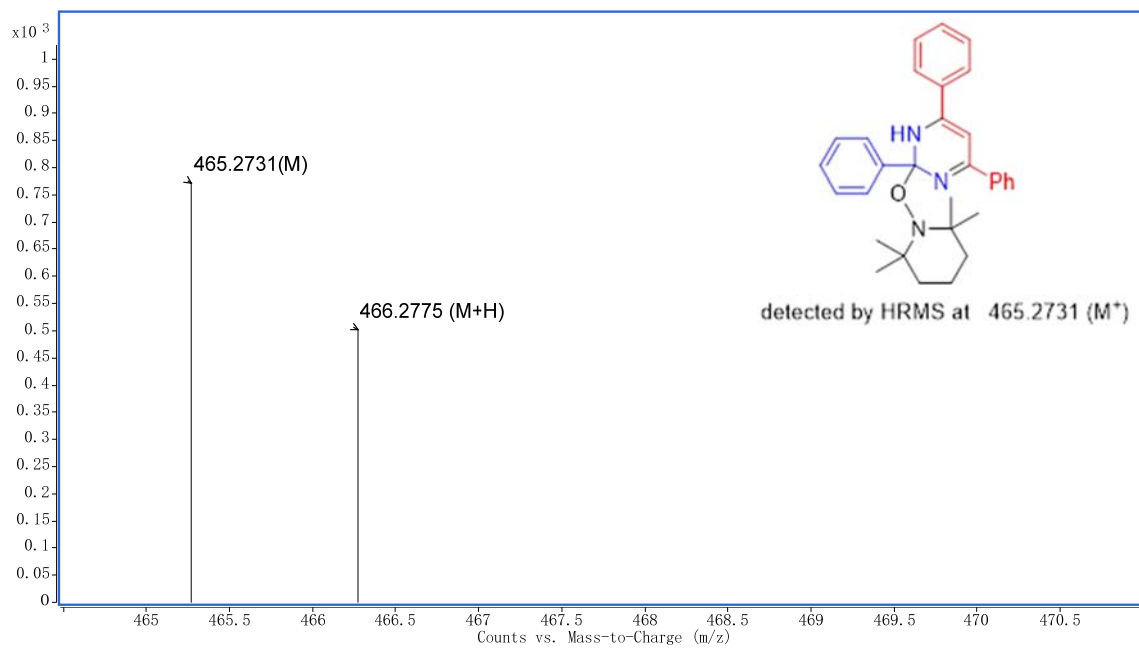

**Figure S4**

## 5. Conditions optimization and reaction scope details

**Table S1** Conditions screening for the synthesis of 2,4,6-triphenylpyrimidine (**3a**).

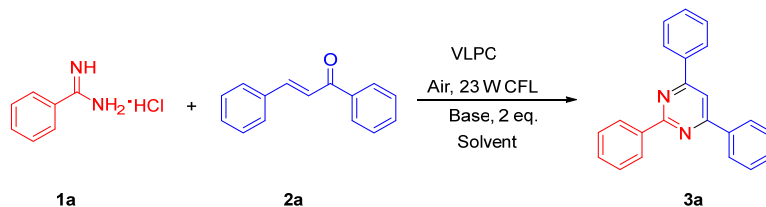

| Entry             | VLPC, 5 mol%                          | Base                            | Solvent               | Light source   | Temp, °C | Time, h | Yield, % <sup>a, b</sup> |
|-------------------|---------------------------------------|---------------------------------|-----------------------|----------------|----------|---------|--------------------------|
| 1                 | Eosin Y                               | K <sub>2</sub> CO <sub>3</sub>  | DMF                   | 23 W CFLs      | 35       | 5       | 21                       |
| 2                 | Eosin Y                               | K <sub>2</sub> CO <sub>3</sub>  | DMF                   | 23 W CFLs      | 40       | 6       | 36                       |
| 3                 | Eosin Y                               | K <sub>2</sub> CO <sub>3</sub>  | DMF                   | 23 W CFLs      | 45       | 5       | 47                       |
| 4                 | Eosin Y                               | K <sub>2</sub> CO <sub>3</sub>  | DMF                   | 23 W CFLs      | 50       | 4       | 56                       |
| 5                 | Eosin Y                               | K <sub>2</sub> CO <sub>3</sub>  | DMF                   | 23 W CFLs      | 55       | 4       | 51                       |
| 6                 | Eosin Y                               | KOH                             | DMF                   | 23 W CFLs      | 50       | 4.5     | 57                       |
| 7                 | Eosin Y                               | KO <sup>t</sup> Bu              | DMF                   | 23 W CFLs      | 50       | 4       | 53                       |
| 8                 | Eosin Y                               | Na <sub>2</sub> CO <sub>3</sub> | DMF                   | 23 W CFLs      | 50       | 5       | 10                       |
| 9                 | Eosin Y                               | K <sub>3</sub> PO <sub>4</sub>  | DMF                   | 23 W CFLs      | 50       | 5       | 8                        |
| 10                | Eosin Y                               | /                               | DMF                   | 23 W CFLs      | 50       | 4       | NR                       |
| 11                | Methylene Blue                        | K <sub>2</sub> CO <sub>3</sub>  | DMF                   | 23 W CFLs      | 50       | 4       | 56                       |
| 12                | Rose Bengal                           | K <sub>2</sub> CO <sub>3</sub>  | DMF                   | 23 W CFLs      | 50       | 4.5     | 50                       |
| 13                | TPP                                   | K <sub>2</sub> CO <sub>3</sub>  | DMF                   | 23 W CFLs      | 50       | 5       | 51                       |
| 14                | TXO                                   | K <sub>2</sub> CO <sub>3</sub>  | DMF                   | 24 W blue LEDs | 50       | 5       | 50                       |
| 15                | Co(dmgH) <sub>2</sub> Cl <sub>2</sub> | K <sub>2</sub> CO <sub>3</sub>  | DMF                   | 24 W blue LEDs | 50       | 5       | 21                       |
| 16                | Eosin Y                               | K <sub>2</sub> CO <sub>3</sub>  | MeOH                  | 23 W CFLs      | 50       | 8       | 24                       |
| 17 <sup>c</sup>   | Eosin Y                               | K <sub>2</sub> CO <sub>3</sub>  | MeCN+H <sub>2</sub> O | 23 W CFLs      | 50       | 6       | 19                       |
| 18                | Eosin Y                               | K <sub>2</sub> CO <sub>3</sub>  | DMSO                  | 23 W CFLs      | 50       | 4       | 75                       |
| 19                | Eosin Y                               | K <sub>2</sub> CO <sub>3</sub>  | DMF                   | In dark.       | 50       | 4.5     | 17                       |
| 20                | Eosin Y                               | K <sub>2</sub> CO <sub>3</sub>  | DMSO                  | In dark.       | 50       | 4       | 20                       |
| 21 <sup>d</sup>   | Eosin Y                               | K <sub>2</sub> CO <sub>3</sub>  | DMSO                  | 23 W CFLs      | 50       | 4       | 16                       |
| 22                | Eosin Y                               | /                               | DMSO                  | 23 W CFLs      | 50       | 4       | NR                       |
| 23                | /                                     | K <sub>2</sub> CO <sub>3</sub>  | DMSO                  | 23 W CFLs      | 50       | 4       | 16                       |
| 24                | Eosin Y, 1 mol%                       | K <sub>2</sub> CO <sub>3</sub>  | DMSO                  | 23 W CFLs      | 50       | 4       | 20                       |
| 25                | Eosin Y, 2.5 mol%                     | K <sub>2</sub> CO <sub>3</sub>  | DMSO                  | 23 W CFLs      | 50       | 4       | 75                       |
| 26                | Eosin Y, 10 mol%                      | K <sub>2</sub> CO <sub>3</sub>  | DMSO                  | 23 W CFLs      | 50       | 4       | 76                       |
| 27 <sup>e</sup>   | Eosin Y, 2.5 mol%                     | K <sub>2</sub> CO <sub>3</sub>  | DMSO                  | 23 W CFLs      | 50       | 4       | 78                       |
| 28 <sup>f</sup>   | Eosin Y, 2.5 mol%                     | K <sub>2</sub> CO <sub>3</sub>  | DMSO                  | 23 W CFLs      | 50       | 4+1     | 81                       |
| 29 <sup>e,f</sup> | Eosin Y, 2.5 mol%                     | K <sub>2</sub> CO <sub>3</sub>  | DMSO                  | 23 W CFLs      | 50       | 4+0.2   | 80                       |

<sup>a</sup> Reagents and conditions: benzenamide hydrochloride (0.1 mmol), chalcone (0.2 mmol), base (2 eq) and 0.005 mmol VLPC were dissolved in 4 mL solvent and irradiated under four 23w CFLs at 50 °C open to air until the reaction was completed by TLC monitoring. TXO: Thioxanthen-9-one. TPP: 2,4,6-Triphenylpyrylium. NR =



No reaction. <sup>b</sup> Isolated yield. <sup>c</sup> MeCN 4.0 mL and H<sub>2</sub>O 0.3 mL was used. <sup>d</sup> Under argon. <sup>e</sup> Under oxygen. <sup>f</sup> The reaction mixture was stirred for about 4 h until the benzamidine hydrochloride was consumed, then irradiated at ambient temperature (40 °C) for about 1 h to complete the transformation.

VLPC

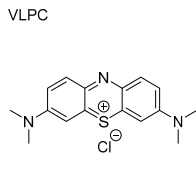

Methylene blue

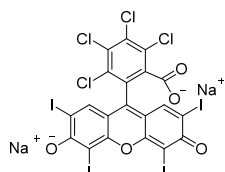

Rose Bengal

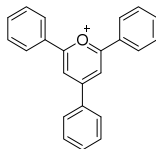

TPP

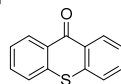

TXO

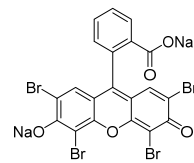

Eosin Y

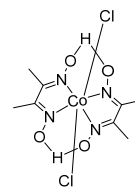

Co(dmgh)<sub>2</sub>Cl<sub>2</sub>

**Table S2** Scope of substrates.

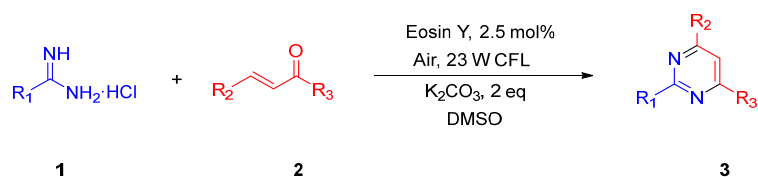

| entry | Amidine (1) | Chalcone (2) | Product (3) | Method and time <sup>a</sup>                      | Yield, % <sup>a, b</sup> |
|-------|-------------|--------------|-------------|---------------------------------------------------|--------------------------|
| 1     |             |              |             | A, 4 h, 50 °C                                     | 75                       |
|       |             |              |             | B: 2 h (in dark, 50 °C), 1 h (irradiation, 40 °C) | 81                       |
| 2     |             |              |             | A, 4 h, 50 °C                                     | 72                       |
|       |             |              |             | B: 2 h (in dark, 50 °C), 2 h (irradiation, 40 °C) | 84                       |
| 3     |             |              |             | A, 4 h, 50 °C                                     | 47                       |
|       |             |              |             | B: 4 h (in dark, 50 °C), 1 h (irradiation, 40 °C) | 75                       |
| 4     |             |              |             | A, 4 h, 50 °C, using 2 eq $NaHCO_3$ as base       | 40                       |
|       |             |              |             | B: 2 h (in dark, 50 °C), 2 h (irradiation, 40 °C) | 60                       |
| 5     |             |              |             | A, 4 h, 50 °C                                     | 71                       |
|       |             |              |             | B: 4 h (in dark, 50 °C), 1 h (irradiation, 40 °C) | 73                       |
| 6     |             |              |             | A, 4 h, 50 °C                                     | 74                       |
|       |             |              |             | B: 2 h (in dark, 50 °C), 2 h (irradiation, 40 °C) | 89                       |
| 7     |             |              |             | A, 4 h, 50 °C                                     | 72                       |
|       |             |              |             | B: 2 h (in dark, 50 °C), 2 h (irradiation, 40 °C) | 67                       |
| 8     |             |              |             | A, 4 h, 50 °C                                     | 40                       |
|       |             |              |             | B: 3 h (in dark, 50 °C), 1 h (irradiation, 40 °C) | 51                       |

|    |                                                                                     |                                                                                     |                                                                                     |                                                    |    |
|----|-------------------------------------------------------------------------------------|-------------------------------------------------------------------------------------|-------------------------------------------------------------------------------------|----------------------------------------------------|----|
| 9  | 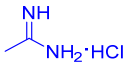   |    |    | A, 3 h, 50 °C                                      | 41 |
|    |                                                                                     |                                                                                     |                                                                                     | B: 2 h (in dark, 50 °C), 1 h (irradiation, 40 °C)  | 65 |
| 10 |    |    |    | A, 3 h, 50 °C                                      | 76 |
|    |                                                                                     |                                                                                     |                                                                                     | B: 2 h (in dark, 50 °C), 2 h (irradiation, 40 °C)  | 80 |
| 11 |    |    |    | A, 4 h, 50 °C                                      | 71 |
|    |                                                                                     |                                                                                     |                                                                                     | B: 3 h (in dark, 50 °C), 2 h (irradiation, 40 °C)  | 77 |
| 12 |    |    |    | A, 28 h, 50 °C                                     | 65 |
|    |                                                                                     |                                                                                     |                                                                                     | B: 5 h (in dark, 50 °C), 5 h (irradiation, 40 °C), | 52 |
| 13 |  |  |   | A: 4.5 h, 50 °C                                    | 65 |
|    |                                                                                     |                                                                                     |                                                                                     | B: 2 h (in dark, 50 °C), 1 h (irradiation, 40 °C)  | 70 |
| 14 |  |  |  | A: 4.5 h, 50 °C                                    | 65 |
|    |                                                                                     |                                                                                     |                                                                                     | B: 2 h (in dark, 50 °C), 1 h (irradiation, 40 °C)  | 62 |
| 15 |  |  |  | A: 4.5 h, 60 °C                                    | 67 |
|    |                                                                                     |                                                                                     |                                                                                     | B: 4 h (in dark, 60 °C), 1 h (irradiation, 40 °C)  | 52 |
| 16 |  |  |  | A: 4 h, 50 °C                                      | 67 |
|    |                                                                                     |                                                                                     |                                                                                     | B: 2 h (in dark, 50 °C), 1 h (irradiation, 40 °C)  | 78 |
| 17 |  |  |  | A: 5 h, 60 °C                                      | 76 |
|    |                                                                                     |                                                                                     |                                                                                     | B: 4 h (in dark, 60 °C), 1 h (irradiation, 40 °C)  | 80 |

|    |                                                                                     |                                                                                     |                                                                                     |                                                                            |       |
|----|-------------------------------------------------------------------------------------|-------------------------------------------------------------------------------------|-------------------------------------------------------------------------------------|----------------------------------------------------------------------------|-------|
| 18 | 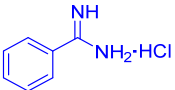   |    |    | A: 3 h, 50 °C                                                              | 63    |
|    |                                                                                     |                                                                                     |                                                                                     | B: 2 h (in dark, 50 °C), 1 h (irradiation, 40 °C)                          | 74    |
| 19 |    |    |    | A: 4 h, 50 °C                                                              | 80    |
|    |                                                                                     |                                                                                     |                                                                                     | B: 2 h (in dark, 50 °C), 1 h (irradiation, 40 °C)                          | 90    |
| 20 |    |    |    | A: 4 h, 50 °C                                                              | 79    |
|    |                                                                                     |                                                                                     |                                                                                     | B: 4 h (in dark, 50 °C), 1 h (irradiation, 40 °C)                          | 88    |
| 21 |    |    |    | A: 4 h, 50 °C                                                              | 75    |
|    |                                                                                     |                                                                                     |                                                                                     | B: 3 h (in dark, 50 °C), 1 h (irradiation, 40 °C)                          | 83    |
| 22 |    |    |   | A: 4 h, 50 °C                                                              | 33    |
|    |                                                                                     |                                                                                     |                                                                                     | B: 3 h (in dark, 50 °C), 1 h (irradiation, 40 °C)                          | 84    |
| 23 |  |  |  | A: 4 h, 50 °C                                                              | 94    |
|    |                                                                                     |                                                                                     |                                                                                     | B: 4 h (in dark, 50 °C), 4 h (irradiation, 40 °C)                          | 82    |
| 24 |  |  |  | A: 2 h, 50 °C                                                              | 28    |
|    |                                                                                     |                                                                                     |                                                                                     | B: 2 h (in dark, 75 °C), 2 h (irradiation, 40 °C)                          | 73    |
| 25 |  |  |  | A: 4 h, 50 °C                                                              | 71    |
|    |                                                                                     |                                                                                     |                                                                                     | B: 4 h (in dark, 50 °C), 1 h (irradiation, 40 °C)                          | 74    |
| 26 |  |  |  | A: 4 h, 50 °C                                                              | Trace |
|    |                                                                                     |                                                                                     |                                                                                     | B: 4 h (in dark, 100 °C), 2 h (irradiation, 43 °C),                        | 32    |
|    |                                                                                     |                                                                                     |                                                                                     | B: 4 h (in dark, 100 °C), 2 h (irradiation, 43 °C), using 2 eq KOH as base | 45    |

|    |                                                                                     |                                                                                     |                                                                                     |                                                     |       |
|----|-------------------------------------------------------------------------------------|-------------------------------------------------------------------------------------|-------------------------------------------------------------------------------------|-----------------------------------------------------|-------|
| 27 | 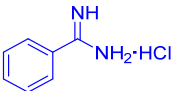   |    |    | A: 4 h, 50 °C                                       | 37    |
|    |                                                                                     |                                                                                     |                                                                                     | B: 4 h (in dark, 75 °C), 1 h (irradiation, 40 °C)   | 57    |
| 28 |    |    |    | A: 4 h, 50 °C                                       | Trace |
|    |                                                                                     |                                                                                     |                                                                                     | B: 4 h (in dark, 70 °C), 2 h (irradiation, 40 °C)   | 44    |
| 29 |    |    |    | A: 4 h, 50 °C using 2 eq NaHCO <sub>3</sub> as base | 44.8  |
|    |                                                                                     |                                                                                     |                                                                                     | B: 2 h (in dark, 85 °C), 1 h (irradiation, 40 °C)   | 67    |
| 30 |    |    |   | 5 h (in dark, 50 °C), 2 h (irradiation, 40 °C)      | 36    |
| 31 |  |  |  | 4 h (in dark, 50 °C), 2 h (irradiation, 40 °C)      | Trace |

<sup>a</sup> Reagents and conditions: benzamidine hydrochloride (0.1 mmol), chalcone (0.2 mmol), K<sub>2</sub>CO<sub>3</sub> (2 eq) were dissolved in 4 mL DMSO. To the reaction mixture, Eosin Y (0.0025 mmol) was added and irradiated under four 23 w CFLs at 50 °C open to air until the reaction was completed by TLC monitoring (Method A). Otherwise, the reaction mixture was stirred at 50 °C or specified temperature until the benzamidine hydrochloride was consumed, and then VLPC was added and irradiated at ambient temperature (40 °C) for about 1 h to complete the transformation (Method B). <sup>b</sup> Isolated yield.

## 6. The spectral data

All the reported compounds' spectral data ( $^1\text{H}$  NMR,  $^{13}\text{C}$  NMR) agree with the cited references. New compound **3f** and dihydropyrimidine intermediate **4a** was characterized by  $^1\text{H}$  NMR,  $^{13}\text{C}$  NMR and HRMS.

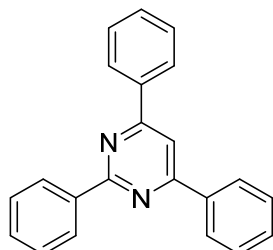

### 2,4,6-Triphenylpyrimidine (**3a**)<sup>4</sup>

Yield: 25.0 mg, 80%. White solid, m.p. 190-191 °C (petroleum ether/dichloromethane = 2:1, V/V).  $^1\text{H}$  NMR (500 MHz,  $\text{CDCl}_3$ )  $\delta$  8.74 (dd,  $J = 7.9$ , 1.6 Hz, 2H), 8.30 (dd,  $J = 7.8$ , 1.7 Hz, 4H), 8.03 (s, 1H), 7.61 – 7.49 (m, 9H).  $^{13}\text{C}$  NMR (151 MHz,  $\text{CDCl}_3$ )  $\delta$  164.9, 164.7, 138.3, 137.7, 130.9, 130.8, 129.1, 128.62, 128.59, 127.4, 110.5. IR(KBr)  $\nu_{\text{max}}$ : 3095, 3065, 3032, 2923, 2852, 1589, 1570, 1530, 1496, 1361, 738, 681, 630  $\text{cm}^{-1}$ .

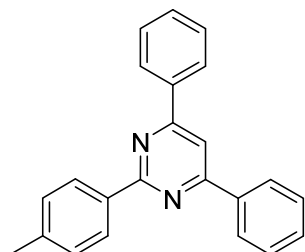

### 4,6-Diphenyl-2-(*p*-tolyl) pyrimidine (**3b**)<sup>5</sup>

Yield: 27.0 mg, 84%. White solid, m.p. 179-182 °C (petroleum ether/dichloromethane = 2:1, V/V).  $^1\text{H}$  NMR (600 MHz,  $\text{CDCl}_3$ )  $\delta$  8.64 (d,  $J = 8.1$  Hz, 2H), 8.30 (dd,  $J = 8.0$ , 1.5 Hz, 4H), 7.99 (s, 1H), 7.61 – 7.52 (m, 6H), 7.36 (d,  $J = 8.0$  Hz, 2H), 2.47 (s, 3H).  $^{13}\text{C}$  NMR (151 MHz,  $\text{CDCl}_3$ )  $\delta$  164.83, 164.75, 141.0, 137.8, 135.6, 130.8, 129.4, 129.0, 128.6, 127.4, 110.2, 21.7. IR(KBr)  $\nu_{\text{max}}$ : 3084, 3057, 3030, 2949, 2916, 1586, 1566, 1529, 1494, 1360, 758, 685  $\text{cm}^{-1}$ .

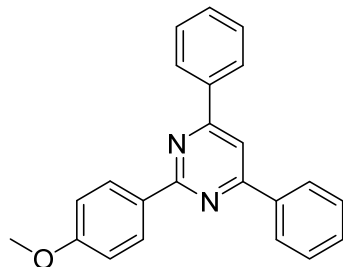

### 2-(4-Methoxyphenyl)-4,6-diphenylpyrimidine (**3c**)<sup>6</sup>

Yield: 25.4 mg, 75%. White solid, m.p. 140-141 °C (petroleum ether/dichloromethane = 2:1, V/V).  $^1\text{H}$  NMR (600 MHz,  $\text{CDCl}_3$ )  $\delta$  8.70 (d,  $J = 8.8$  Hz, 2H), 8.33 – 8.25 (m,

4H), 7.96 (s, 1H), 7.61 – 7.50 (m, 6H), 7.06 (d,  $J = 8.8$  Hz, 2H), 3.91 (s, 3H).  $^{13}\text{C}$  NMR (151 MHz,  $\text{CDCl}_3$ )  $\delta$  164.8, 164.4, 162.0, 137.8, 131.1, 130.8, 130.2, 129.0, 127.4, 113.9, 109.8, 55.5. IR(KBr)  $\nu_{\text{max}}$ : 3052, 2958, 2933, 2839, 1607, 1588, 1567, 1532, 1360, 1248, 764, 685  $\text{cm}^{-1}$ .

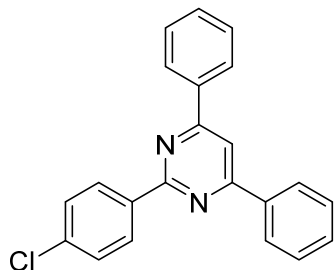

#### 2-(4-Chlorophenyl)-4,6-diphenylpyrimidine (3d) <sup>5</sup>

Yield: 25.0 mg, 73%. White solid, m.p. 219-221 °C (petroleum ether/dichloromethane = 2:1, V/V).  $^1\text{H}$  NMR (600 MHz,  $\text{CDCl}_3$ )  $\delta$  8.67 (d,  $J = 8.5$  Hz, 2H), 8.31 – 8.23 (m, 4H), 8.01 (s, 1H), 7.60 – 7.53 (m, 6H), 7.50 (d,  $J = 8.5$  Hz, 2H).  $^{13}\text{C}$  NMR (151 MHz,  $\text{CDCl}_3$ )  $\delta$  165.0, 163.7, 137.5, 137.0, 136.8, 131.0, 130.0, 129.1, 128.8, 127.4, 110.6. IR(KBr)  $\nu_{\text{max}}$ : 3087, 3067, 3038, 1586, 1565, 1526, 1361, 759, 683  $\text{cm}^{-1}$ .

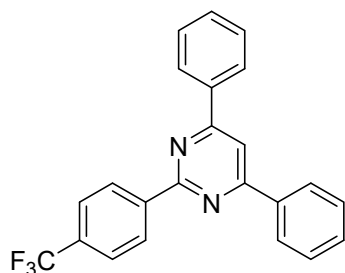

#### 4,6-Diphenyl-2-(4-(trifluoromethyl)phenyl)pyrimidine (3e) <sup>7</sup>

Yield: 22.8 mg, 60%. White solid, m.p. 205-206 °C (petroleum ether/dichloromethane = 2:1, V/V).  $^1\text{H}$  NMR (600 MHz,  $\text{CDCl}_3$ )  $\delta$  8.83 (d,  $J = 8.1$  Hz, 2H), 8.33 – 8.24 (m, 4H), 8.05 (s, 1H), 7.79 (d,  $J = 8.2$  Hz, 2H), 7.63 – 7.52 (m, 6H).  $^{13}\text{C}$  NMR (151 MHz,  $\text{CDCl}_3$ )  $\delta$  165.0, 163.2, 141.4, 137.2, 132.2 (q,  $J = 32.2$  Hz), 131.0, 129.0, 128.7, 127.3, 125.4 (q,  $J = 3.8$  Hz), 124.3 (q,  $J = 272.1$  Hz), 111.0.  $^{19}\text{F}$  NMR (565 MHz,  $\text{CDCl}_3$ )  $\delta$  -63.14. IR(KBr)  $\nu_{\text{max}}$ : 3065, 2926, 1595, 1567, 1534, 1497, 1329, 1116, 1068, 766, 685  $\text{cm}^{-1}$ .

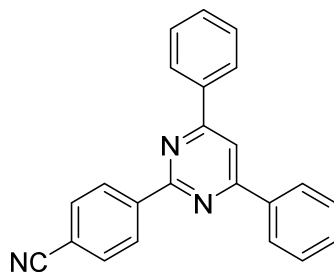

#### 4-(4,6-Diphenyl-2-pyrimidinyl)benzotrile (3f)

Yield: 18.0 mg, 54%. White solid, m.p. 240-242 °C (petroleum ether/dichloromethane = 2:1, V/V).  $^1\text{H}$  NMR (600 MHz,  $\text{CDCl}_3$ )  $\delta$  8.83 (d,  $J = 8.1$  Hz, 2H), 8.27 (dd,  $J = 6.3, 2.7$  Hz, 4H), 8.07 (s, 1H), 7.82 (d,  $J = 8.2$  Hz, 2H), 7.58 (dd,  $J = 5.0, 1.7$  Hz, 6H).  $^{13}\text{C}$  NMR (151 MHz,  $\text{CDCl}_3$ )  $\delta$  165.20, 162.82, 142.37, 137.13, 132.41, 131.28, 129.18,

129.06, 127.42, 119.11, 113.99, 111.30. IR(KBr)  $\nu_{\max}$ : 3058, 2221, 1586, 1576, 1561, 1528, 1360, 765, 687  $\text{cm}^{-1}$ . HRMS calcd for  $\text{C}_{23}\text{H}_{16}\text{N}_3^+$  ( $\text{M}+\text{H}$ ) $^+$ : 334.13387, found: 334.13324.

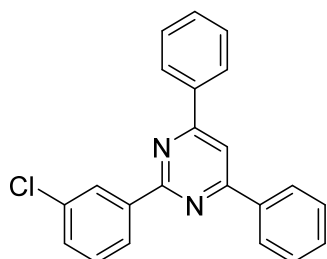

**2-(3-Chlorophenyl)-4,6-diphenylpyrimidine (3g)** <sup>8</sup>

Yield: 30.5 mg, 89%. White solid, m.p. 156-160 °C (petroleum ether/dichloromethane = 2:1, V/V).  $^1\text{H}$  NMR (600 MHz,  $\text{CDCl}_3$ )  $\delta$  8.71 (d,  $J = 1.7$  Hz, 1H), 8.63 (dt,  $J = 6.7, 1.7$  Hz, 1H), 8.31 – 8.27 (m, 4H), 8.05 (s, 1H), 7.61 – 7.54 (m, 6H), 7.51 – 7.46 (m, 2H).  $^{13}\text{C}$  NMR (151 MHz,  $\text{CDCl}_3$ )  $\delta$  165.0, 163.4, 140.2, 137.4, 134.7, 131.1, 130.7, 129.8, 129.1, 128.6, 127.4, 126.7, 110.9. IR(KBr)  $\nu_{\max}$ : 3091, 3063, 3040, 1586, 1567, 1526, 1360, 759, 732, 686  $\text{cm}^{-1}$ .

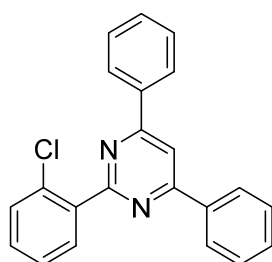

**2-(2-Chlorophenyl)-4,6-diphenylpyrimidine (3h)** <sup>9</sup>

Yield: 23.0 mg, 67%. White solid, m.p. 72-74 °C (petroleum ether/dichloromethane = 2:1, V/V).  $^1\text{H}$  NMR (600 MHz,  $\text{CDCl}_3$ )  $\delta$  8.26 (dd,  $J = 7.6, 1.9$  Hz, 4H), 8.08 (s, 1H), 8.05 – 8.00 (m, 1H), 7.59 – 7.51 (m, 7H), 7.45 – 7.38 (m, 2H).  $^{13}\text{C}$  NMR (151 MHz,  $\text{CDCl}_3$ )  $\delta$  165.6, 165.0, 138.2, 137.4, 133.3, 132.3, 131.0, 130.9, 130.5, 129.1, 127.6, 126.9, 110.6. IR(KBr)  $\nu_{\max}$ : 3063, 3046, 1586, 1574, 1527, 1495, 1364, 744, 682  $\text{cm}^{-1}$ .

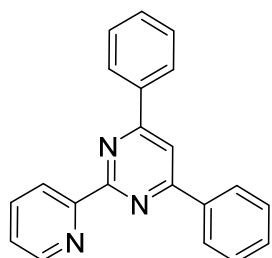

**4,6-Diphenyl-2-(pyridin-2-yl)pyrimidine (3i)** <sup>5</sup>

Yield: 16.7 mg, 54%. Yellow solid, m.p. 144-146 °C (petroleum ether/dichloromethane = 2:1, V/V).  $^1\text{H}$  NMR (600 MHz,  $\text{CDCl}_3$ )  $\delta$  8.91 (dt,  $J = 4.7, 1.4$  Hz, 1H), 8.73 (dt,  $J = 7.9, 1.1$  Hz, 1H), 8.34 – 8.25 (m, 4H), 8.12 (s, 1H), 7.90 (td,  $J = 7.7, 1.8$  Hz, 1H), 7.60



– 7.50 (m, 6H), 7.43 (ddd,  $J = 7.5, 4.7, 1.2$  Hz, 1H).  $^{13}\text{C}$  NMR (151 MHz,  $\text{CDCl}_3$ )  $\delta$  165.6, 164.1, 155.7, 150.2, 137.4, 136.9, 131.0, 129.1, 127.6, 124.8, 124.3, 112.0. IR(KBr)  $\nu_{\text{max}}$ : 3054, 3003, 1575, 1564, 1528, 1362, 752, 689  $\text{cm}^{-1}$ . HRMS calcd for  $\text{C}_{21}\text{H}_{16}\text{N}_3^+$  ( $\text{M}+\text{H}$ ) $^+$ : 310.13387, found: 310.13339.

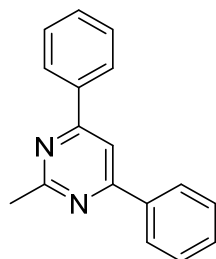

### 2-Methyl-4,6-diphenylpyrimidine (3j) <sup>7</sup>

Yield: 16.0 mg, 65%. White solid, m.p. 90–92 °C (petroleum ether/dichloromethane = 2:1, V/V).  $^1\text{H}$  NMR (600 MHz, Chloroform- $d$ )  $\delta$  8.13 (dd,  $J = 7.6, 1.9$  Hz, 4H), 7.89 (s, 1H), 7.56 – 7.49 (m, 6H), 2.87 (s, 3H).  $^{13}\text{C}$  NMR (151 MHz,  $\text{CDCl}_3$ )  $\delta$  168.7, 165.0, 137.7, 130.8, 129.1, 127.4, 110.2, 26.6. IR(KBr)  $\nu_{\text{max}}$ : 3052, 3038, 2960, 2928, 2856, 1584, 1574, 1531, 1367, 745, 686  $\text{cm}^{-1}$ .

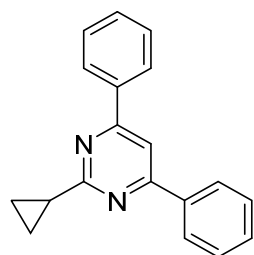

### 2-Cyclopropyl-4,6-diphenylpyrimidine (3k) <sup>5</sup>

Yield: 21.9 mg, 80%. White solid, m.p. 89-90 °C (petroleum ether/dichloromethane = 2:1, V/V).  $^1\text{H}$  NMR ( $\text{CDCl}_3$ , 600 MHz):  $\delta$  8.16-8.13 (m, 4H), 7.85 (s, 1H), 7.55-7.51 (m, 6H), 2.45-2.38 (m, 1H), 1.34-1.31 (m, 2H), 1.14-1.09 (m, 2H).  $^{13}\text{C}$  NMR (151 MHz,  $\text{CDCl}_3$ )  $\delta$  172.3, 164.5, 137.8, 130.7, 129.0, 127.3, 109.6, 18.7, 10.8. IR(KBr)  $\nu_{\text{max}}$ : 3087, 3061, 3009, 2964, 2930, 1586, 1575, 1536, 1365, 761, 686  $\text{cm}^{-1}$ .

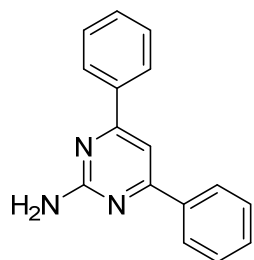

### 4,6-Diphenylpyrimidin-2-amine (3l) <sup>10</sup>

Yield: 19.0 mg, 77%. White solid, m.p. 140-142 °C (petroleum ether/dichloromethane = 2:1, V/V).  $^1\text{H}$  NMR (600 MHz,  $\text{CDCl}_3$ )  $\delta$  8.09 – 8.04 (m, 4H), 7.53 – 7.48 (m, 6H),

7.47 (s, 1H), 5.33 (d,  $J = 21.0$  Hz, 2H).  $^{13}\text{C}$  NMR (151 MHz,  $\text{CDCl}_3$ )  $\delta$  166.4, 163.7, 137.9, 130.6, 128.9, 127.3, 104.5. IR(KBr)  $\nu_{\text{max}}$ : 3468, 3318, 3067, 3042, 1603, 1566, 1543, 1364, 765, 692  $\text{cm}^{-1}$ .

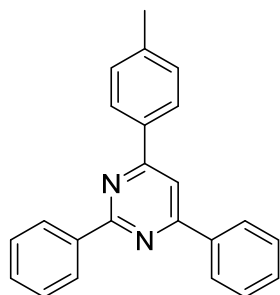

### 2,4-Diphenyl-6-(*p*-tolyl)pyrimidine (3ab) <sup>11</sup>

Yield: 22.6mg, 70%. White solid, m.p. 167-170 °C (petroleum ether/dichloromethane = 2:1, V/V).  $^1\text{H}$  NMR (600 MHz,  $\text{CDCl}_3$ )  $\delta$  8.74 (d,  $J = 6.8$  Hz, 2H), 8.30 (d,  $J = 6.6$  Hz, 2H), 8.21 (d,  $J = 8.1$  Hz, 2H), 8.00 (s, 1H), 7.62 – 7.50 (m, 6H), 7.37 (d,  $J = 7.9$  Hz, 2H), 2.47 (s, 3H).  $^{13}\text{C}$  NMR (151 MHz,  $\text{CDCl}_3$ )  $\delta$  164.8, 164.8, 164.6, 141.3, 138.4, 137.8, 134.9, 130.8, 130.7, 129.8, 129.0, 128.6, 128.6, 127.4, 127.3, 110.1, 21.6. IR(KBr)  $\nu_{\text{max}}$ : 3063, 3030, 2914, 1589, 1569, 1527, 1510, 1496, 1361, 748, 687  $\text{cm}^{-1}$ .

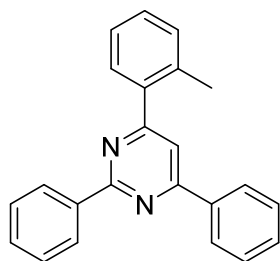

### 2,4-Diphenyl-6-(*o*-tolyl)pyrimidine (3ac) <sup>11</sup>

Yield: 16.7mg, 52%. Yellow liquid (petroleum ether/dichloromethane = 2:1, V/V).  $^1\text{H}$  NMR (600 MHz, Chloroform-*d*)  $\delta$  8.68 (dd,  $J = 7.7, 1.9$  Hz, 2H), 8.28 (dd,  $J = 7.7, 1.9$  Hz, 2H), 7.75 (s, 1H), 7.60 (d,  $J = 7.6$  Hz, 1H), 7.54 (dd,  $J = 21.4, 7.3$  Hz, 6H), 7.43 – 7.34 (m, 3H), 2.58 (s, 3H).  $^{13}\text{C}$  NMR (151 MHz,  $\text{CDCl}_3$ )  $\delta$  168.3, 164.3, 164.2, 138.8, 138.2, 137.5, 136.6, 131.4, 130.9, 130.8, 129.8, 129.5, 129.1, 128.6, 127.4, 126.3, 114.5, 20.9. IR(KBr)  $\nu_{\text{max}}$ : 3057, 2919, 1533, 1489, 1444, 1390, 1006, 756, 691  $\text{cm}^{-1}$ .

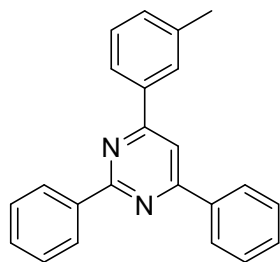

### 2,4-Diphenyl-6-(*m*-tolyl)pyrimidine (3ad) <sup>11</sup>

Yield: 25.3mg, 78%. White solid, m.p. 127-129 °C (petroleum ether/dichloromethane = 2:1, V/V).  $^1\text{H}$  NMR (500 MHz,  $\text{CDCl}_3$ )  $\delta$  8.78 – 8.70 (m, 2H), 8.31 (dd,  $J = 7.8, 1.6$

Hz, 2H), 8.11 (s, 1H), 8.08 (d,  $J = 7.8$  Hz, 1H), 8.01 (s, 1H), 7.60 – 7.51 (m, 6H), 7.46 (t,  $J = 7.6$  Hz, 1H), 7.37 (d,  $J = 7.5$  Hz, 1H), 2.52 (s, 3H).  $^{13}\text{C}$  NMR (151 MHz,  $\text{CDCl}_3$ )  $\delta$  165.1, 164.8, 164.6, 138.8, 138.4, 137.74, 137.68, 131.7, 130.9, 130.8, 129.05, 128.97, 128.62, 128.59, 128.0, 127.4, 124.6, 110.6, 21.8. IR(KBr)  $\nu_{\text{max}}$ : 3054, 3030, 2919, 2856, 1588, 1571, 1531, 1353, 748, 686  $\text{cm}^{-1}$ .

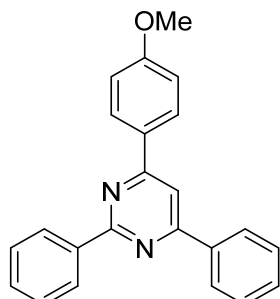

#### 4-(4-Methoxyphenyl)-2,6-diphenylpyrimidine (3ae) <sup>11</sup>

Yield: 27.0 mg, 80%. White solid, m.p. 139-140 °C (petroleum ether/dichloromethane = 2:1, V/V).  $^1\text{H}$  NMR (500 MHz,  $\text{CDCl}_3$ )  $\delta$  8.72 (dt,  $J = 8.4, 2.2$  Hz, 2H), 8.31 – 8.26 (m, 4H), 7.96 (s, 1H), 7.59 – 7.51 (m, 6H), 7.10 – 7.05 (m, 2H), 3.91 (s, 3H).  $^{13}\text{C}$  NMR (151 MHz,  $\text{CDCl}_3$ )  $\delta$  164.6, 164.5, 164.4, 162.1, 138.4, 137.9, 130.8, 130.7, 130.1, 129.0, 128.9, 128.58, 128.55, 127.4, 114.4, 109.6, 55.6. IR(KBr)  $\nu_{\text{max}}$ : 3052, 3003, 2923, 2848, 1612, 1588, 1528, 1513, 1366, 1171, 755, 689  $\text{cm}^{-1}$ .

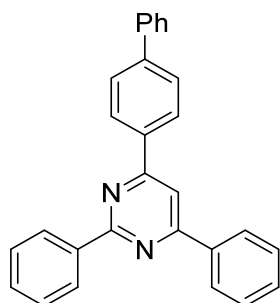

#### 4-([1,1'-Biphenyl]-4-yl)-2,6-diphenylpyrimidine (3af) <sup>11</sup>

Yield: 28.5 mg, 74%. White solid, m.p. 177-179 °C (petroleum ether/dichloromethane = 2:1, V/V).  $^1\text{H}$  NMR (600 MHz,  $\text{CDCl}_3$ )  $\delta$  8.82 – 8.70 (m, 2H), 8.43 – 8.36 (m, 2H), 8.32 (dt,  $J = 8.4, 2.2$  Hz, 2H), 8.06 (s, 1H), 7.85 – 7.76 (m, 2H), 7.75 – 7.64 (m, 2H), 7.62 – 7.52 (m, 6H), 7.53 – 7.47 (m, 2H), 7.45 – 7.39 (m, 1H).  $^{13}\text{C}$  NMR (151 MHz,  $\text{CDCl}_3$ )  $\delta$  164.9, 164.7, 164.5, 143.7, 140.5, 138.3, 137.7, 136.5, 130.9, 130.8, 129.1, 128.63, 128.61, 128.0, 127.9, 127.8, 127.4, 127.3, 110.3. IR(KBr)  $\nu_{\text{max}}$ : 3089, 3061, 3030, 1589, 1570, 1526, 1362, 748, 687  $\text{cm}^{-1}$ .

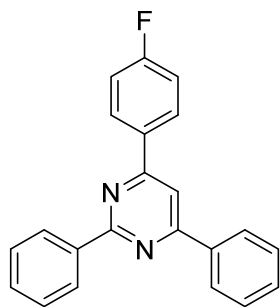

#### 4-(4-Fluorophenyl)-2,6-diphenylpyrimidine (3ag) <sup>11</sup>

Yield: 29.3 mg, 90%. White solid, m.p. 164-166 °C (petroleum ether/dichloromethane = 2:1, V/V). <sup>1</sup>H NMR (500 MHz, CDCl<sub>3</sub>) δ 8.75 – 8.69 (m, 2H), 8.30 (qd, *J* = 8.7, 6.4 Hz, 4H), 7.97 (d, *J* = 1.1 Hz, 1H), 7.61 – 7.50 (m, 6H), 7.28 – 7.22 (m, 3H). <sup>13</sup>C NMR (151 MHz, CDCl<sub>3</sub>) δ 165.0, 164.7 (d, *J* = 251.1 Hz), 164.7, 163.8, 138.2, 137.6, 133.8 (d, *J* = 2.9 Hz), 131.0, 130.9, 129.4 (d, *J* = 8.7 Hz), 129.1, 128.6, 128.6, 127.4, 116.1 (d, *J* = 21.8 Hz), 110.0. <sup>19</sup>F NMR (565 MHz, CDCl<sub>3</sub>) δ -110.41 IR(KBr) ν<sub>max</sub>: 3052, 3029, 2962, 2925, 1572, 1530, 1361, 1231, 834, 750, 687 cm<sup>-1</sup>.

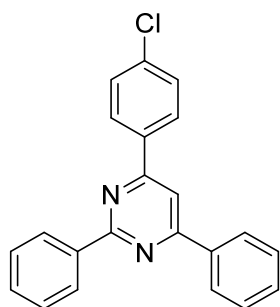

#### 4-(4-Chlorophenyl)-2,6-diphenylpyrimidine (3ah) <sup>11</sup>

Yield: 30.0 mg, 88%. White solid, m.p. 165-166 °C (petroleum ether/dichloromethane = 2:1, V/V). <sup>1</sup>H NMR (600 MHz, Chloroform-*d*) δ 8.71 (d, *J* = 6.5 Hz, 2H), 8.29 (d, *J* = 6.9 Hz, 2H), 8.25 (d, *J* = 8.3 Hz, 2H), 7.98 (s, 1H), 7.59 – 7.51 (m, 8H). <sup>13</sup>C NMR (151 MHz, CDCl<sub>3</sub>) δ 165.0, 164.6, 163.5, 138.0, 137.4, 137.0, 136.0, 130.9, 130.8, 129.2, 129.0, 128.6, 128.49, 128.47, 127.3, 110.0. IR(KBr) ν<sub>max</sub>: 3063, 3046, 1586, 1574, 1527, 1495, 1364, 744, 682 cm<sup>-1</sup>.

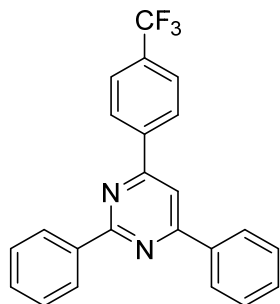

#### 2,4-Diphenyl-6-(4-(trifluoromethyl)phenyl)pyrimidine (3ai) <sup>12</sup>

Yield: 31.4 mg, 83%. White solid, m.p. 136-140 °C (petroleum ether/dichloromethane = 2:1, V/V). <sup>1</sup>H NMR (600 MHz, CDCl<sub>3</sub>) δ 8.75 – 8.66 (m, 2H), 8.38 (d, *J* = 8.1 Hz, 2H), 8.33 – 8.24 (m, 2H), 8.01 (s, 1H), 7.82 (d, *J* = 8.2 Hz, 2H), 7.63 – 7.50 (m, 6H).

$^{13}\text{C}$  NMR (151 MHz,  $\text{CDCl}_3$ )  $\delta$  165.4, 164.9, 163.4, 141.1, 137.9, 137.3, 132.6 (q,  $J = 32.6$  Hz), 131.2, 131.0, 129.1, 128.7, 128.6, 127.8, 127.5, 126.0 (q,  $J = 3.8$  Hz), 124.1 (q,  $J = 272.4$  Hz), 110.7.  $^{19}\text{F}$  NMR (565 MHz,  $\text{CDCl}_3$ )  $\delta$  -63.26. IR(KBr)  $\nu_{\text{max}}$ : 3066, 3038, 2940, 1591, 1570, 1530, 1518, 1364, 1323, 1118, 739  $\text{cm}^{-1}$ .

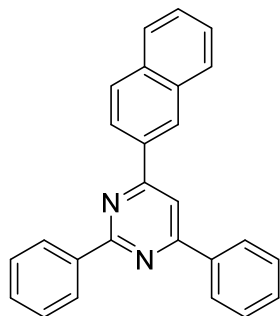

#### 4-(Naphthalen-2-yl)-2,6-diphenylpyrimidine (3aj) <sup>11</sup>

Yield: 29.9 mg, 83.5%. White solid, m.p. 157-159 °C (petroleum ether/dichloromethane = 2:1, V/V).  $^1\text{H}$  NMR (600 MHz,  $\text{CDCl}_3$ )  $\delta$  8.79 (d,  $J = 6.9$  Hz, 2H), 8.77(s, 1H), 8.40 (dd,  $J = 8.5, 1.5$  Hz, 1H), 8.37 – 8.29 (m, 2H), 8.14 (s, 1H), 8.06 – 8.03 (m, 1H), 8.02 (d,  $J = 8.6$  Hz, 1H), 7.95 – 7.89 (m, 1H), 7.65 – 7.42 (m, 8H).  $^{13}\text{C}$  NMR (151 MHz,  $\text{CDCl}_3$ )  $\delta$  164.9, 164.8, 164.7, 138.4, 137.7, 135.0, 134.8, 133.5, 130.9, 130.8, 129.2, 129.1, 128.8, 128.7, 128.6, 127.9, 127.6, 127.47, 127.46, 126.7, 124.4, 110.7. IR(KBr)  $\nu_{\text{max}}$ : 3061, 3038, 1589, 1570, 1531, 1496, 1372, 853, 756, 692  $\text{cm}^{-1}$ .

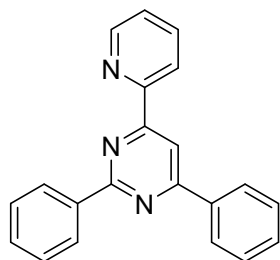

#### 2,4-Diphenyl-6-(pyridin-2-yl)pyrimidine (3ak) <sup>13</sup>

Yield: 25.4 mg, 82%. White solid, m.p. 144-146 °C (petroleum ether/dichloromethane = 2:1, V/V).  $^1\text{H}$  NMR (500 MHz,  $\text{CDCl}_3$ )  $\delta$  8.81 – 8.70 (m, 5H), 8.44 – 8.35 (m, 2H), 7.92 (td,  $J = 7.7, 1.8$  Hz, 1H), 7.61 – 7.50 (m, 6H), 7.47 – 7.38 (m, 1H).  $^{13}\text{C}$  NMR (151 MHz,  $\text{CDCl}_3$ )  $\delta$  165.3, 164.4, 163.7, 154.8, 149.6, 138.2, 137.5, 137.2, 131.0, 130.8, 129.0, 128.63, 128.55, 127.6, 125.4, 122.1, 110.7. IR(KBr)  $\nu_{\text{max}}$ : 3091, 3058, 3034, 3007, 1574, 1566, 1533, 1364, 743, 686  $\text{cm}^{-1}$ .

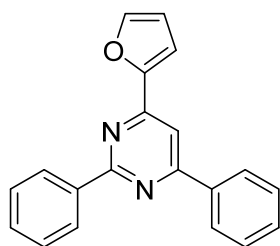

#### 4-(Furan-2-yl)-2,6-diphenylpyrimidine (3al) <sup>14</sup>

Yield: 21.9 mg, 73%. White solid, m.p. 158-160 °C (petroleum ether/dichloromethane = 2:1, V/V).  $^1\text{H}$  NMR (600 MHz,  $\text{CDCl}_3$ )  $\delta$  8.67 (dt,  $J = 4.0, 2.2$  Hz, 2H), 8.30 (dt,  $J =$

4.2, 2.3 Hz, 2H), 7.95 (s, 1H), 7.65 (d,  $J = 0.9$  Hz, 1H), 7.59 – 7.50 (m, 6H), 7.46 (dd,  $J = 3.4, 0.5$  Hz, 1H), 6.64 (dd,  $J = 3.4, 1.7$  Hz, 1H).  $^{13}\text{C}$  NMR (151 MHz,  $\text{CDCl}_3$ )  $\delta$  164.8, 164.6, 156.5, 152.8, 144.9, 138.1, 137.5, 131.0, 130.8, 129.0, 128.6, 128.5, 127.4, 112.6, 112.2, 108.2. IR(KBr)  $\nu_{\text{max}}$ : 3061, 3036, 1601, 1558, 1531, 1482, 748, 698, 684  $\text{cm}^{-1}$ .

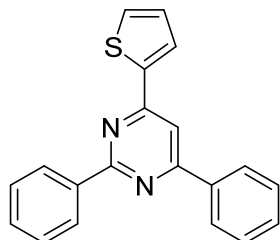

#### 2,4-Diphenyl-6-(thiophen-2-yl)pyrimidine (3am) <sup>12</sup>

Yield: 22.2 mg, 74%. White solid, m.p. 160-164 °C (petroleum ether/dichloromethane = 2:1, V/V).  $^1\text{H}$  NMR (500 MHz,  $\text{CDCl}_3$ ) 8.73 – 8.63 (m, 2H), 8.30 – 8.22 (m, 2H), 7.93 (dd,  $J = 3.7, 1.0$  Hz, 1H), 7.86 (s, 1H), 7.60 – 7.45 (m, 7H), 7.21 (dd,  $J = 5.0, 3.7$  Hz, 1H).  $^{13}\text{C}$  NMR (151 MHz,  $\text{CDCl}_3$ )  $\delta$  164.7, 164.6, 159.8, 143.5, 137.9, 137.5, 131.0, 130.9, 129.9, 129.0, 128.6, 128.4, 127.4, 127.2, 108.6. IR(KBr)  $\nu_{\text{max}}$ : 3071, 3038, 2926, 2852, 1586, 1568, 1524, 1494, 1364, 748, 687  $\text{cm}^{-1}$ .

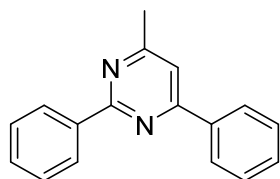

#### 4-Methyl-2,6-diphenylpyrimidine (3an) <sup>15</sup>

Yield: 14.1 mg, 57%. White solid, m.p. 93-94 °C (petroleum ether/dichloromethane = 2:1, V/V).  $^1\text{H}$  NMR (600 MHz,  $\text{CDCl}_3$ )  $\delta$  8.60 (dd,  $J = 7.9, 1.6$  Hz, 2H), 8.22 (dd,  $J = 7.7, 1.8$  Hz, 2H), 7.56 – 7.49 (m, 6H), 7.48 (s, 1H), 2.66 (s, 3H).  $^{13}\text{C}$  NMR (151 MHz,  $\text{CDCl}_3$ )  $\delta$  167.9, 164.5, 163.8, 138.3, 137.4, 130.8, 130.6, 129.0, 128.6, 128.5, 127.3, 114.1, 24.8. IR(KBr)  $\nu_{\text{max}}$ : 3061, 3034, 2919, 1590, 1571, 1533, 1366, 749, 690  $\text{cm}^{-1}$ .

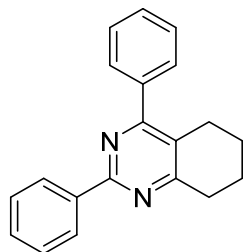

#### 2,4-Diphenyl-5,6,7,8-tetrahydroquinazoline (3ao) <sup>16</sup>

Yield: 12.8 mg, 45%. White solid, m.p. 103-105 °C (petroleum ether/dichloromethane = 2:1, V/V).  $^1\text{H}$  NMR (600 MHz,  $\text{CDCl}_3$ )  $\delta$  8.48 (dd,  $J = 8.0, 1.8$  Hz, 2H), 7.69 – 7.63 (m, 2H), 7.53 – 7.41 (m, 6H), 3.04 (t,  $J = 6.6$  Hz, 2H), 2.80 (t,  $J = 6.2$  Hz, 2H), 2.00 – 1.92 (m, 2H), 1.79 (dtd,  $J = 9.2, 6.1, 3.0$  Hz, 2H).  $^{13}\text{C}$  NMR (151 MHz,  $\text{CDCl}_3$ )  $\delta$  166.9,

165.2, 161.6, 138.8, 138.3, 130.1, 129.2, 129.1, 128.5, 128.3, 128.2, 125.6, 32.9, 27.1, 23.1, 22.6. IR(KBr)  $\nu_{\text{max}}$ : 3089, 3065, 3030, 2944, 2926, 2858, 1538, 1497, 1394, 750, 695  $\text{cm}^{-1}$ .

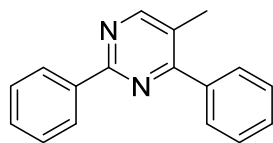

### 5-Methyl-2,4-diphenylpyrimidine (3ap) <sup>17</sup>

Yield: 10.8 mg, 44%. White solid, m.p. 83-84 °C (petroleum ether/dichloromethane = 2:1, V/V). <sup>1</sup>H NMR (600 MHz, CDCl<sub>3</sub>)  $\delta$  8.68 (s, 1H), 8.51 (dd,  $J$  = 10.5, 8.7 Hz, 2H), 7.74 (d,  $J$  = 6.9 Hz, 2H), 7.55 – 7.44 (m, 6H), 2.43 (s, 3H). <sup>13</sup>C NMR (151 MHz, CDCl<sub>3</sub>)  $\delta$  165.0, 162.6, 159.3, 138.6, 137.9, 130.4, 129.4, 129.2, 128.6, 128.5, 128.2, 125.7, 17.2. IR(KBr)  $\nu_{\text{max}}$ : 3058, 3028, 2973, 2923, 2856, 1562, 1534, 1491, 1421, 756, 691  $\text{cm}^{-1}$ .

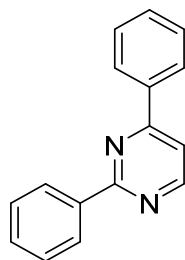

### 2,4-Diphenylpyrimidine (3aq) <sup>18</sup>

Yield: 15.5 mg, 67%. Yellow solid, m.p. 63-65 °C (petroleum ether/dichloromethane = 2:1, V/V). <sup>1</sup>H NMR (600 MHz, Chloroform-*d*)  $\delta$  8.85 (d,  $J$  = 5.2 Hz, 1H), 8.59 (dd,  $J$  = 7.7, 2.0 Hz, 2H), 8.24 (dd,  $J$  = 7.3, 2.4 Hz, 2H), 7.61 (d,  $J$  = 5.2 Hz, 1H), 7.57 – 7.49 (m, 6H). <sup>13</sup>C NMR (151 MHz, CDCl<sub>3</sub>)  $\delta$  164.7, 164.0, 158.0, 138.0, 137.1, 131.1, 130.8, 129.1, 128.7, 128.4, 127.3, 114.7. IR(KBr)  $\nu_{\text{max}}$ : 3054, 3036, 1591, 1561, 1542, 1424, 1378, 747, 688  $\text{cm}^{-1}$ .

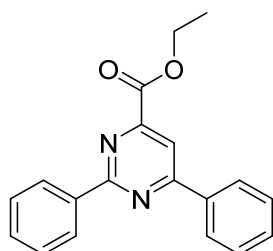

### Ethyl 2,6-diphenylpyrimidine-4-carboxylate (3ar) <sup>19</sup>

Yield: 11.0 mg, 36%. White solid, m.p. 94-95 °C (petroleum ether/dichloromethane = 2:1, V/V). <sup>1</sup>H NMR (600 MHz, Chloroform-*d*)  $\delta$  8.66 (dd,  $J$  = 6.4, 3.2 Hz, 2H), 8.31 (dd,  $J$  = 6.5, 3.1 Hz, 2H), 8.29 (s, 1H), 7.61 – 7.55 (m, 3H), 7.53 (dd,  $J$  = 5.1, 2.0 Hz, 3H), 4.55 (q,  $J$  = 7.1 Hz, 2H), 1.51 (t,  $J$  = 7.1 Hz, 3H). <sup>13</sup>C NMR (151 MHz, CDCl<sub>3</sub>)  $\delta$  166.2, 165.4, 165.1, 156.4, 137.3, 136.5, 131.6, 131.3, 129.2, 128.8, 128.7, 127.6, 114.2,

62.6, 14.4. IR(KBr)  $\nu_{\max}$ : 3057, 2984, 2906, 1744, 1569, 1541, 1376, 1250, 740, 691  $\text{cm}^{-1}$ .

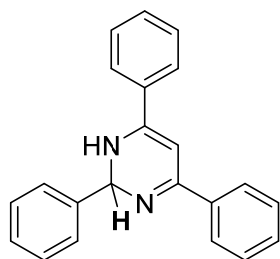

**2,4,6-Triphenyl-1,2-dihydropyrimidine (4a).**

Yield: 23.3 mg, 75%. Yellow solid,  $^1\text{H}$  NMR (600 MHz, Chloroform-*d*)  $\delta$  7.87 (d,  $J$  = 7.5 Hz, 4H), 7.50 – 7.42 (m, 5H), 7.42 – 7.36 (m, 4H), 7.32 (t,  $J$  = 6.9 Hz, 2H), 5.77 – 5.33 (m, 3H).  $^{13}\text{C}$  NMR (151 MHz,  $\text{CDCl}_3$ )  $\delta$  146.0, 135.6, 130.8, 129.1, 128.7, 128.4, 128.4, 128.1, 127.2, 126.6, 125.5. IR(KBr)  $\nu_{\max}$ : 3410, 3054, 3026, 1567, 1527, 1362, 748, 691  $\text{cm}^{-1}$ . HRMS calcd for  $\text{C}_{22}\text{H}_{19}\text{N}_2^+$  ( $\text{M}+\text{H}$ ) $^+$ : 311.15428, found: 311.15381.



## 7. The NMR Charts

### 2,4,6-Triphenylpyrimidine (3a)

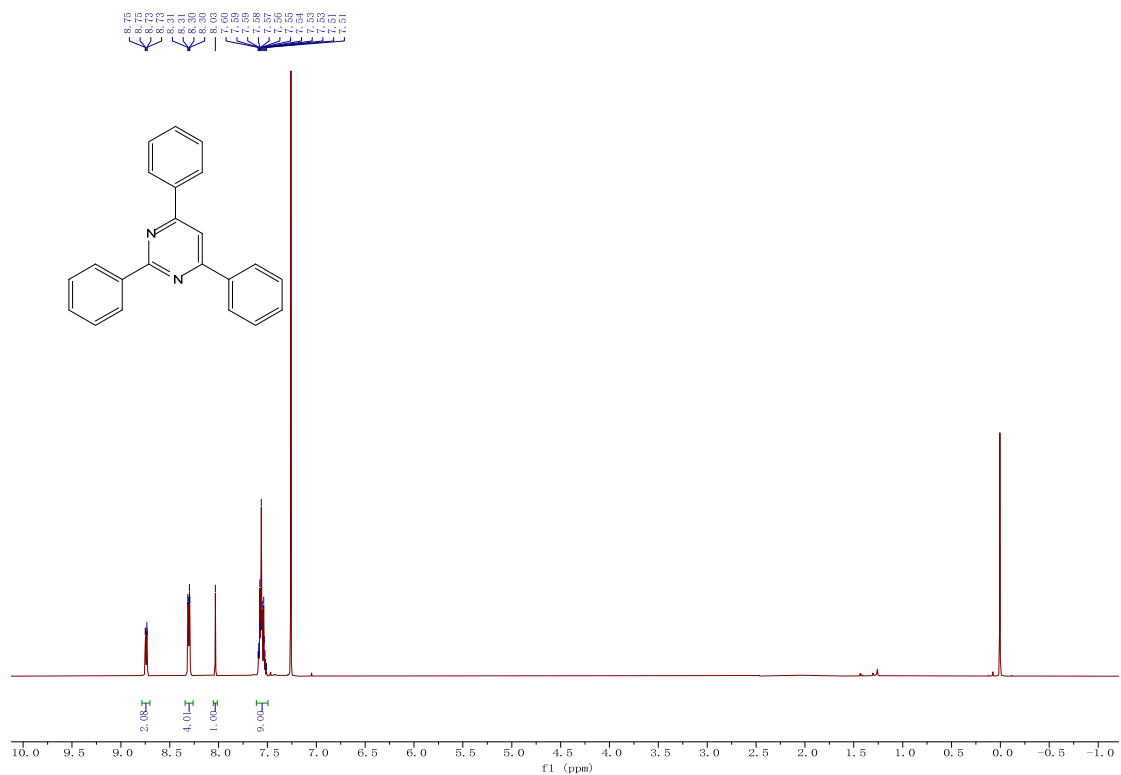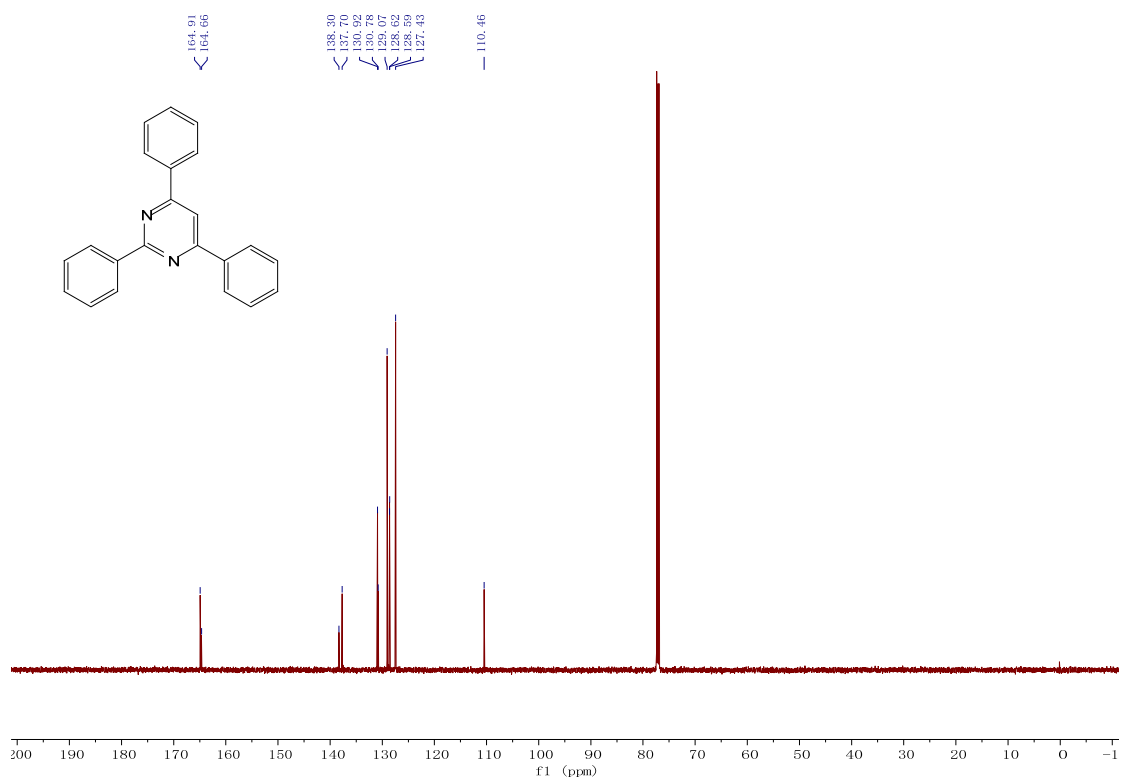

# 4,6-Diphenyl-2-(p-tolyl) pyrimidine (3b)

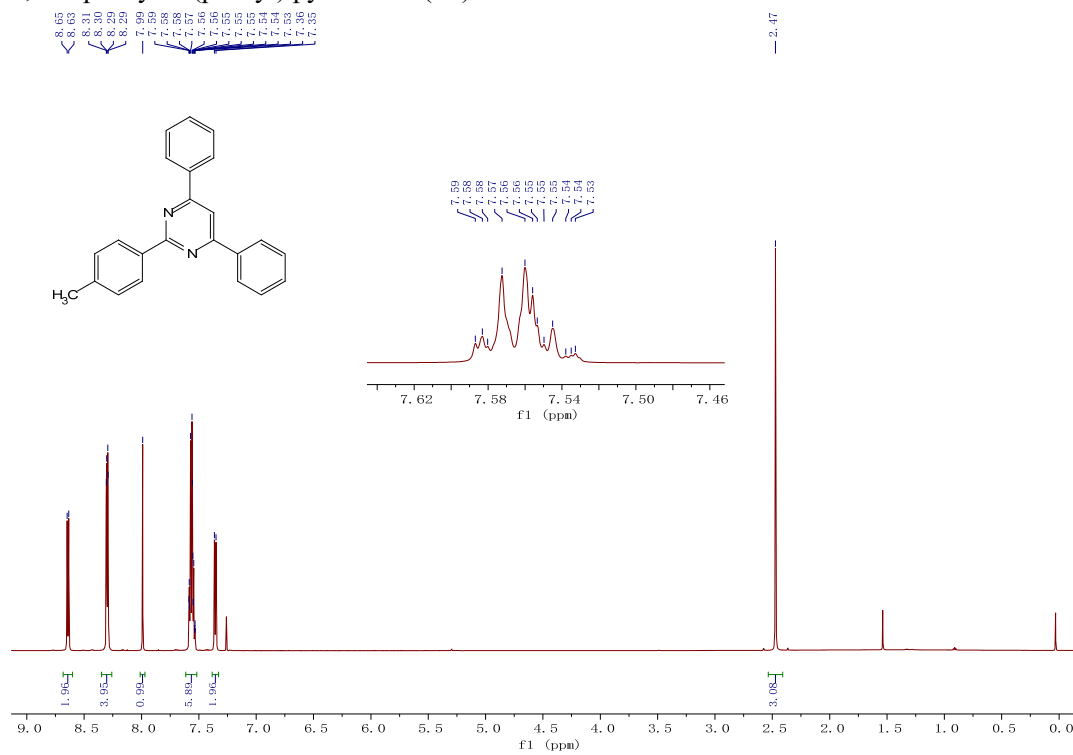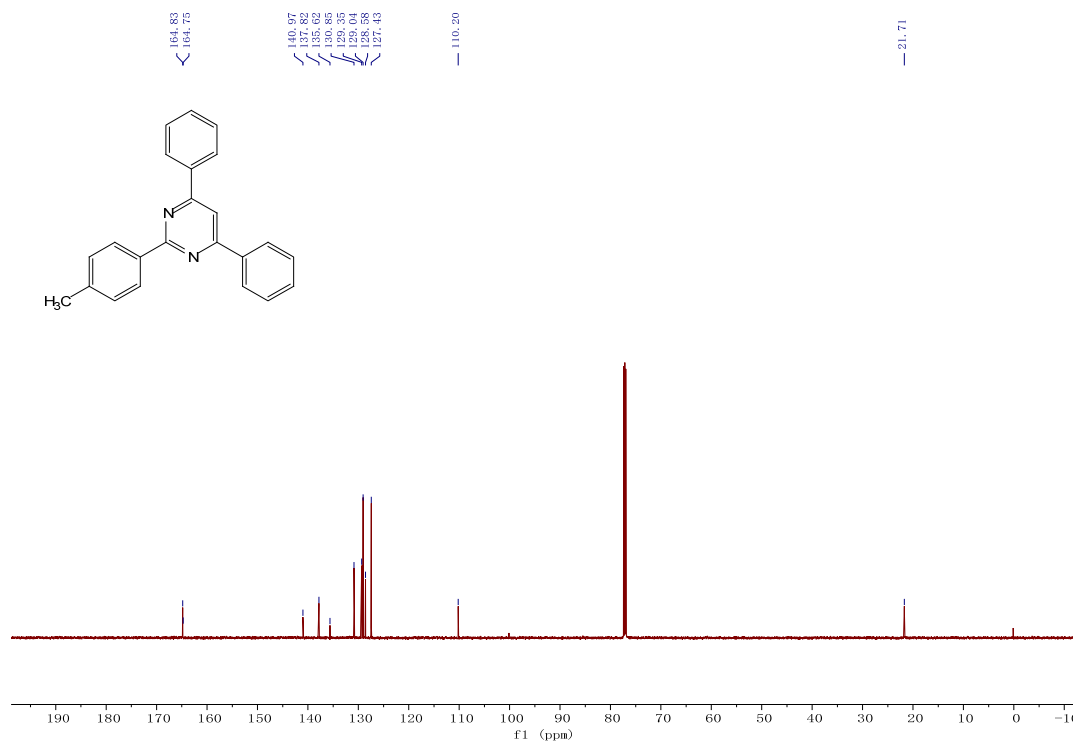

### 2-(4-Methoxyphenyl)-4,6-diphenylpyrimidine (3c)

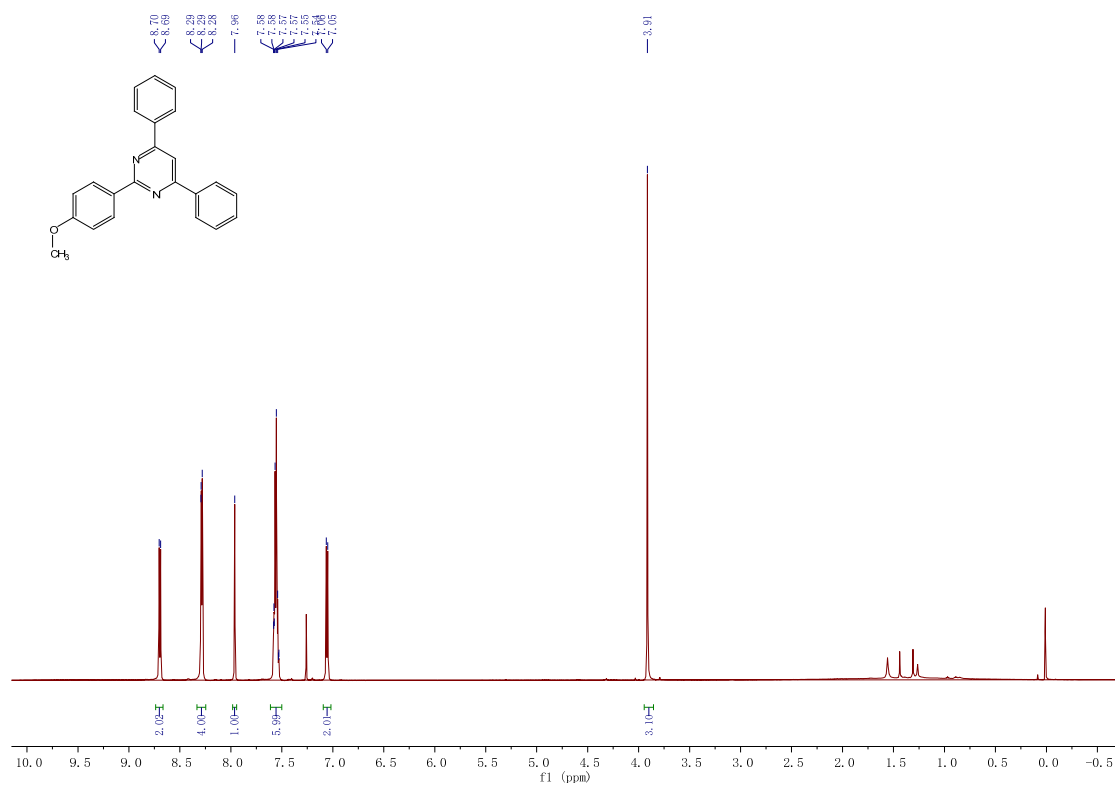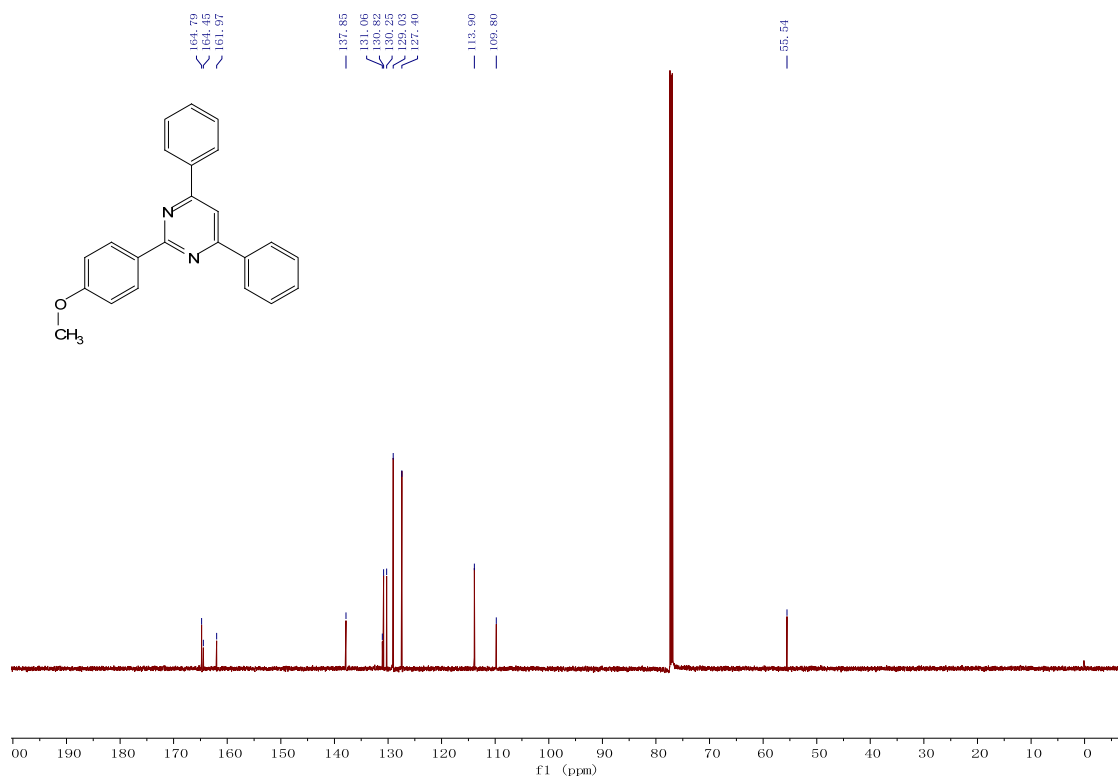

2-(4-Chlorophenyl)-4,6-diphenylpyrimidine (3d)

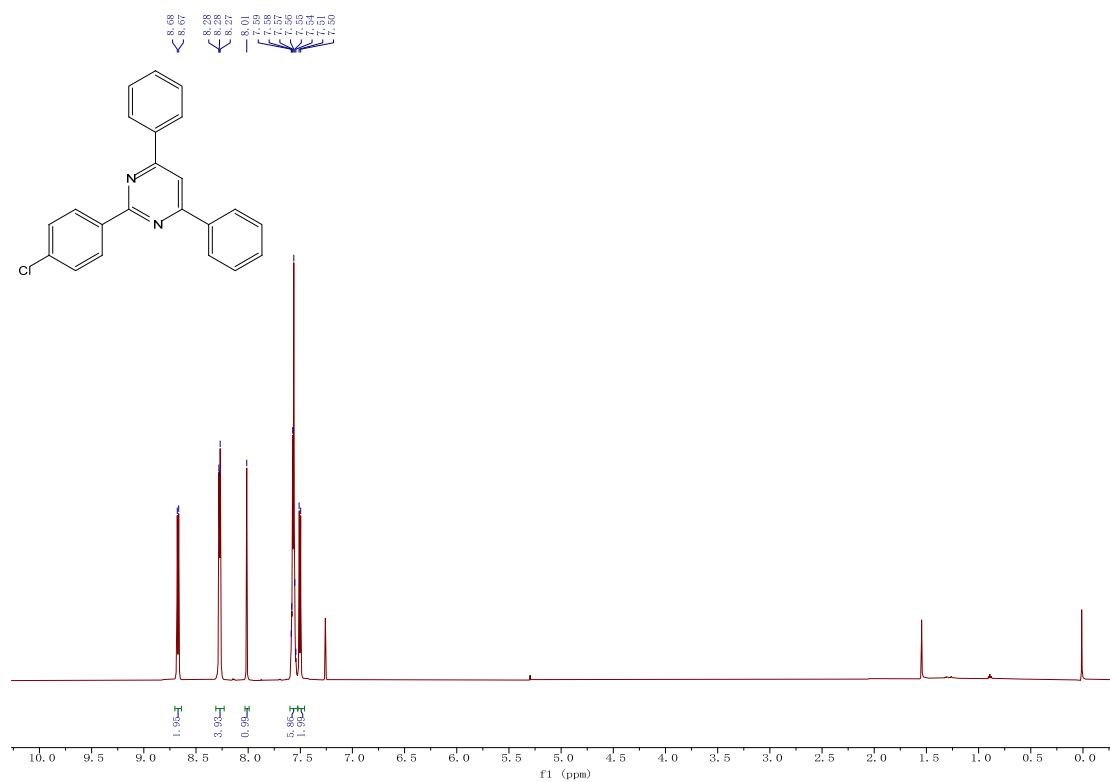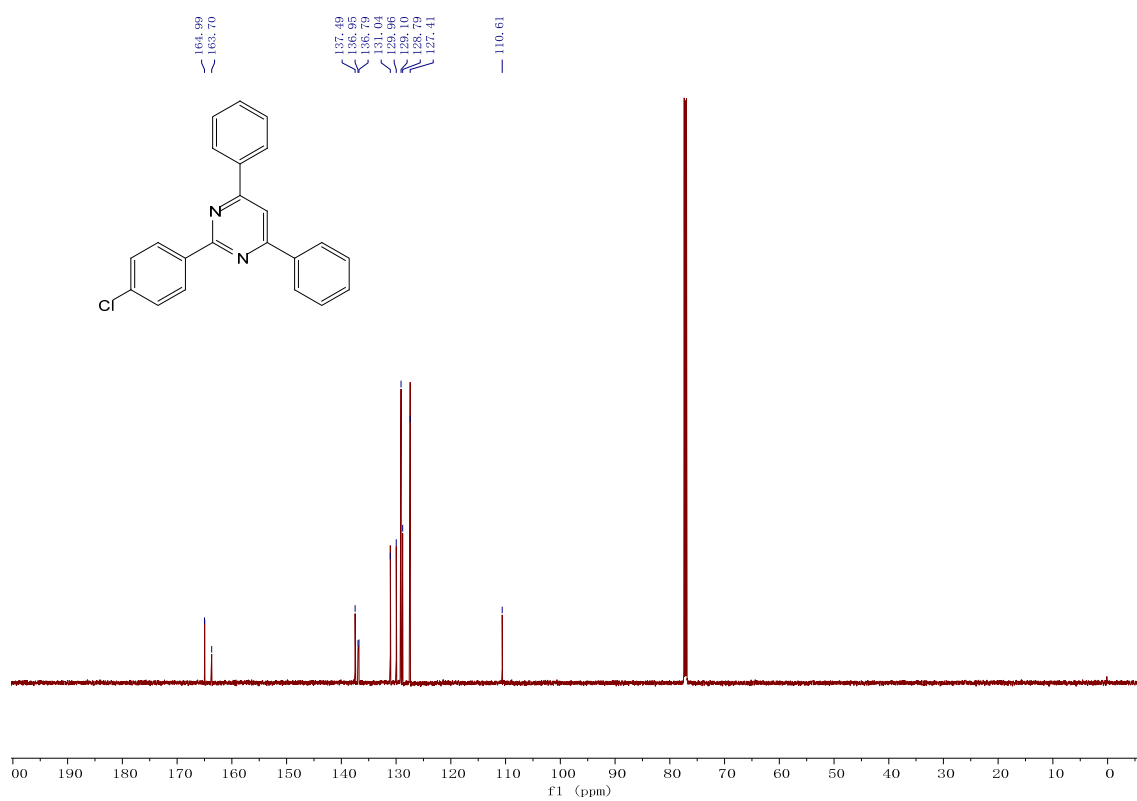

# 4,6-Diphenyl-2-(4-(trifluoromethyl) phenyl) pyrimidine (3e)

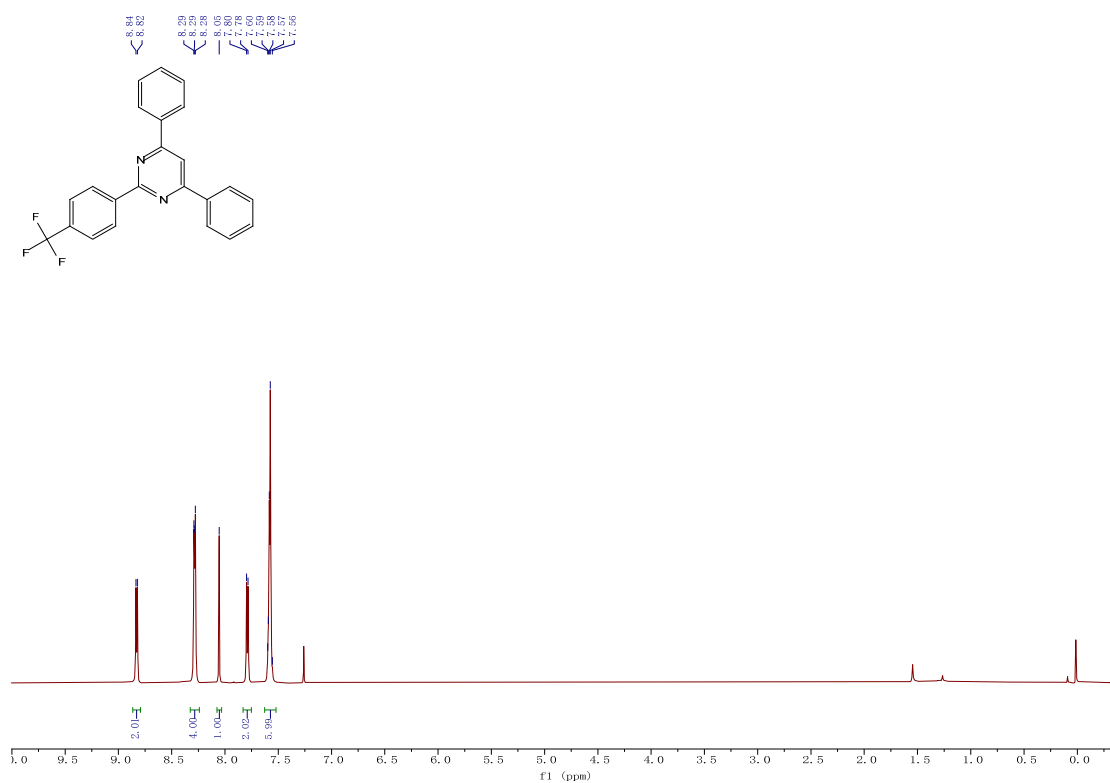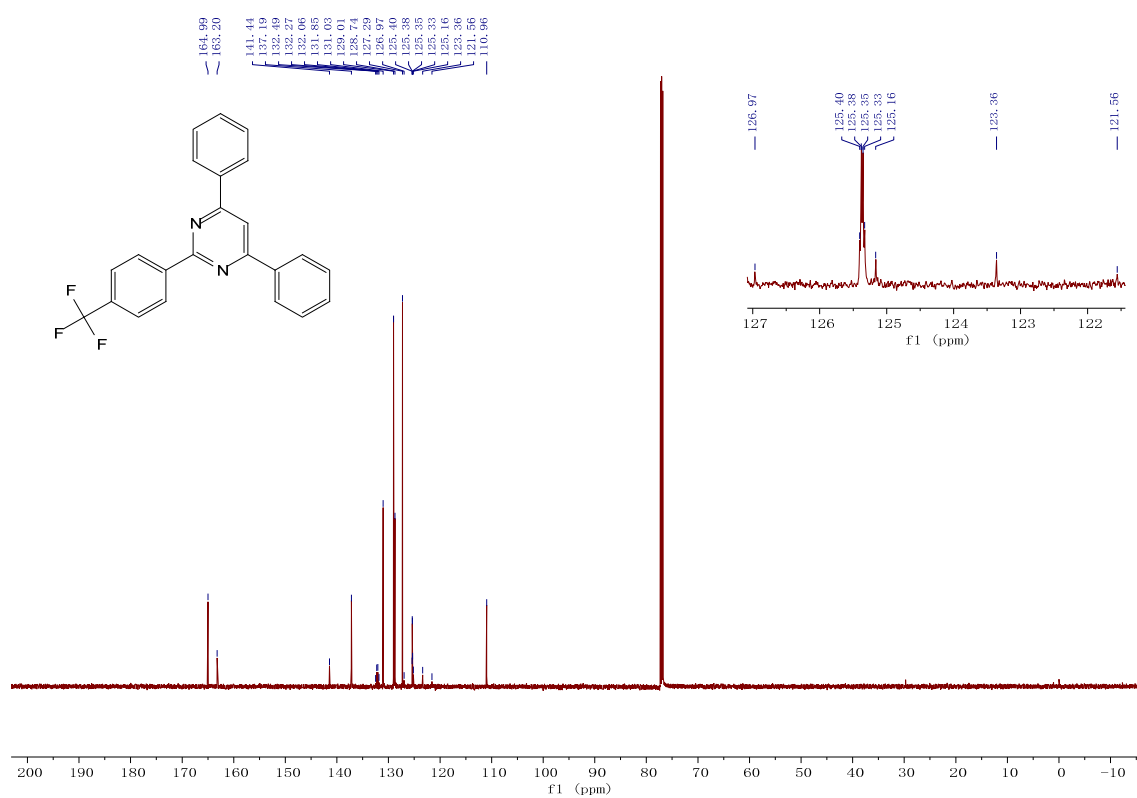

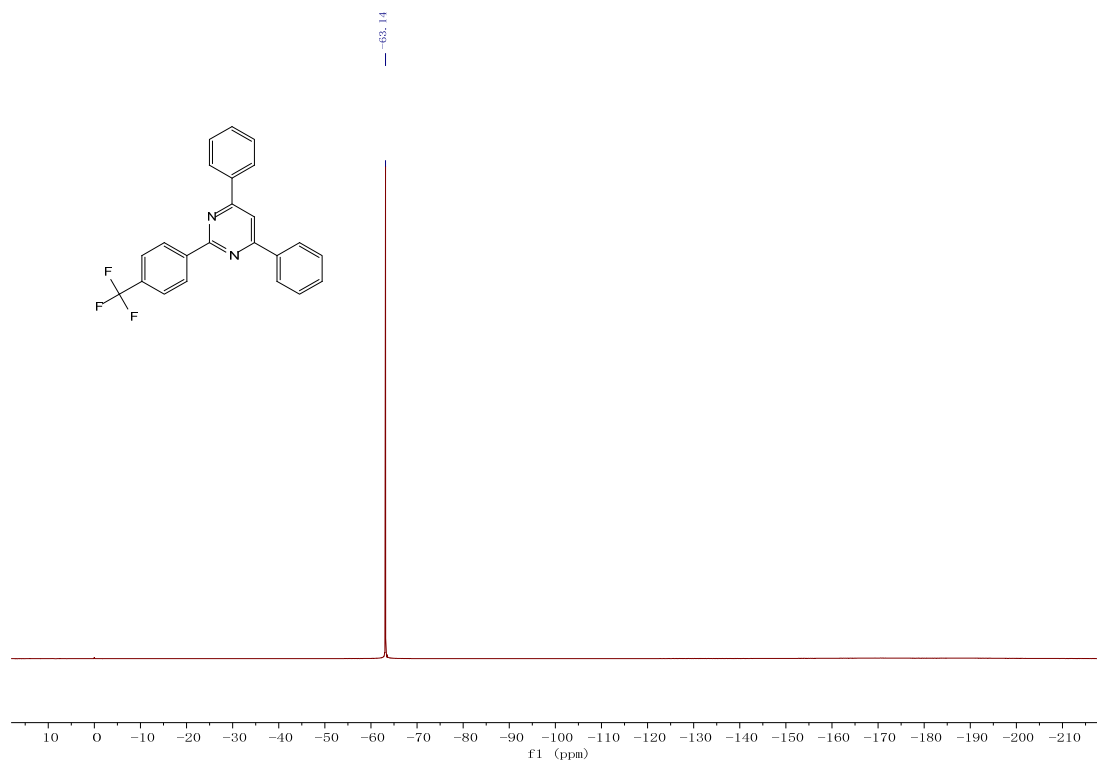

4-(4,6-Diphenyl-2-pyrimidinyl) benzonitrile (3f)

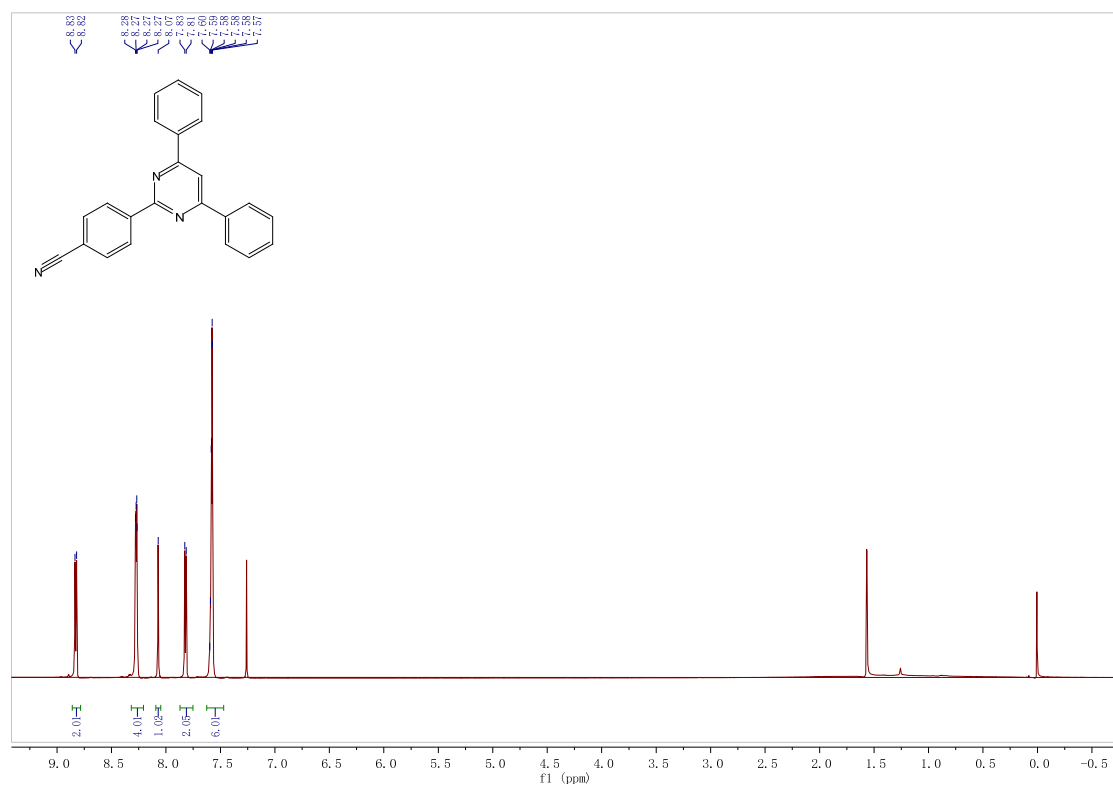

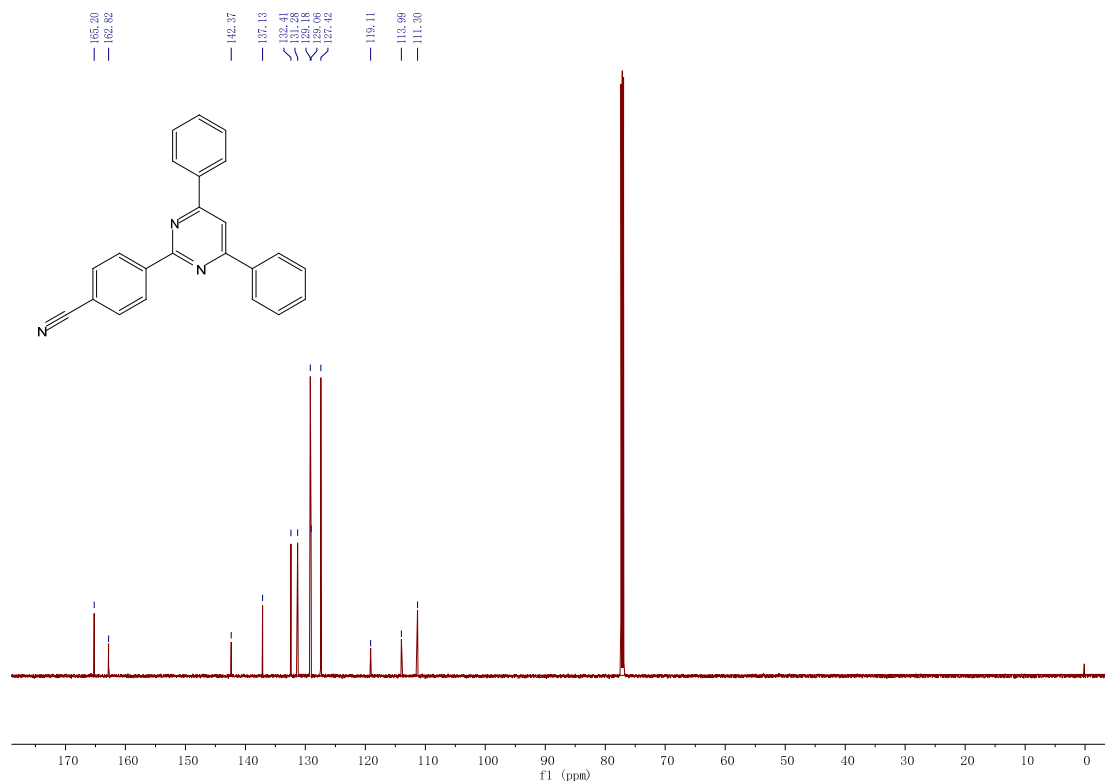

### HRMS

5 #20 RT: 0.19 AV: 1 NL: 1.18E10  
 T: FTMS + c APCI corona Full ms [50.0000-750.0000]

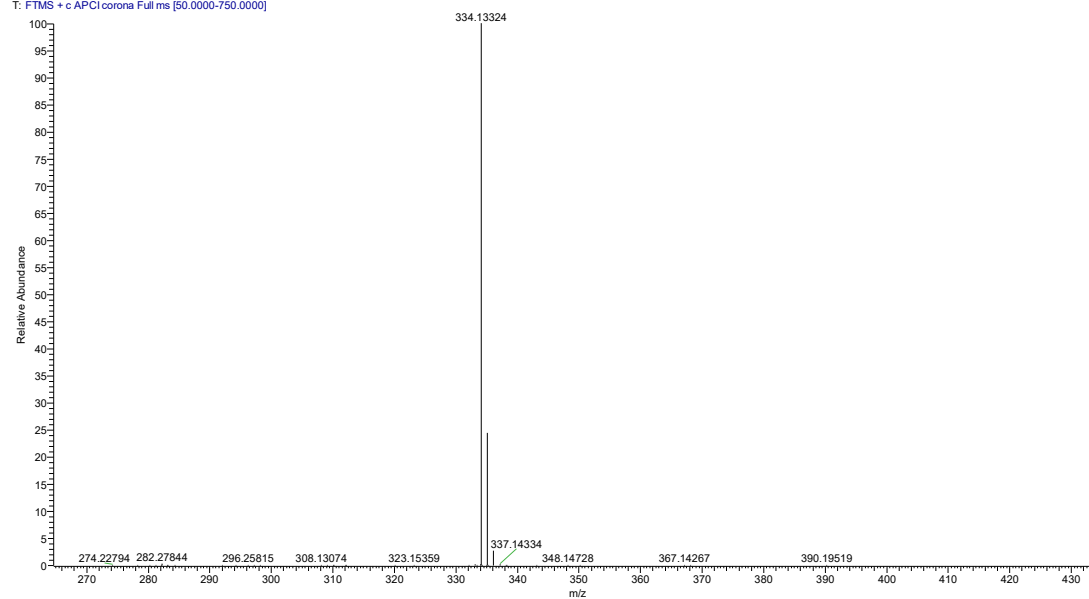

# 2-(3-Chlorophenyl)-4,6-diphenylpyrimidine (3g)

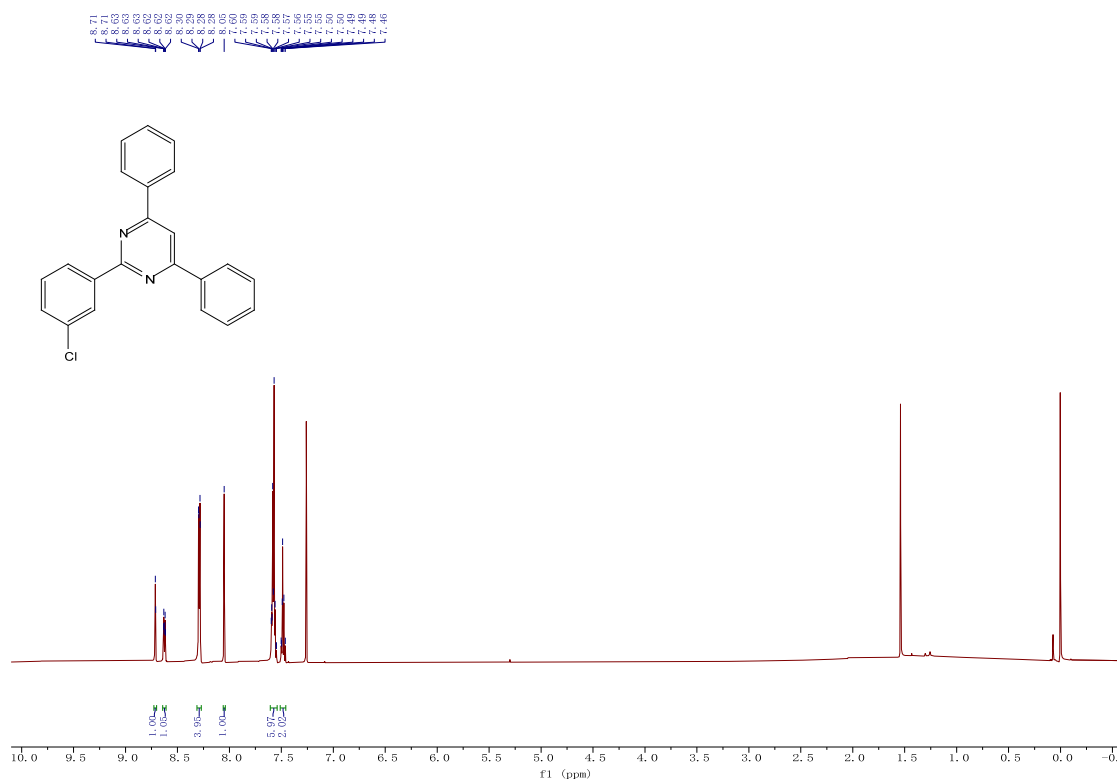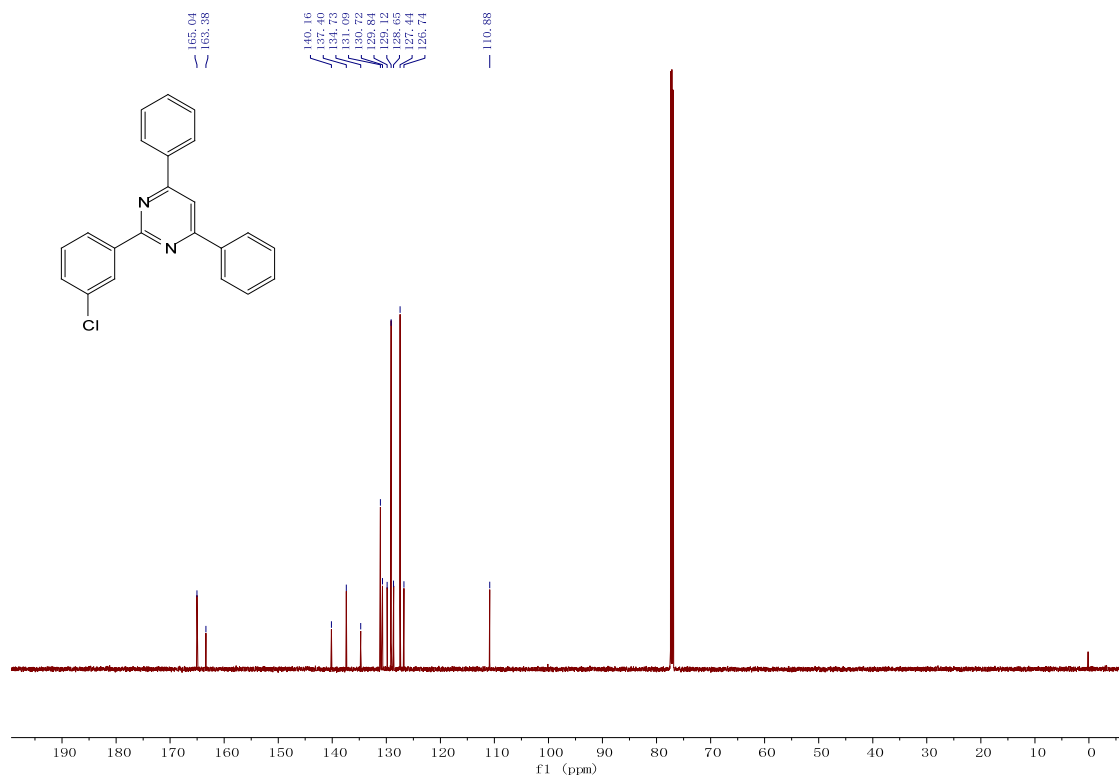



### 2-(2-Chlorophenyl)-4,6-diphenylpyrimidine (3h)

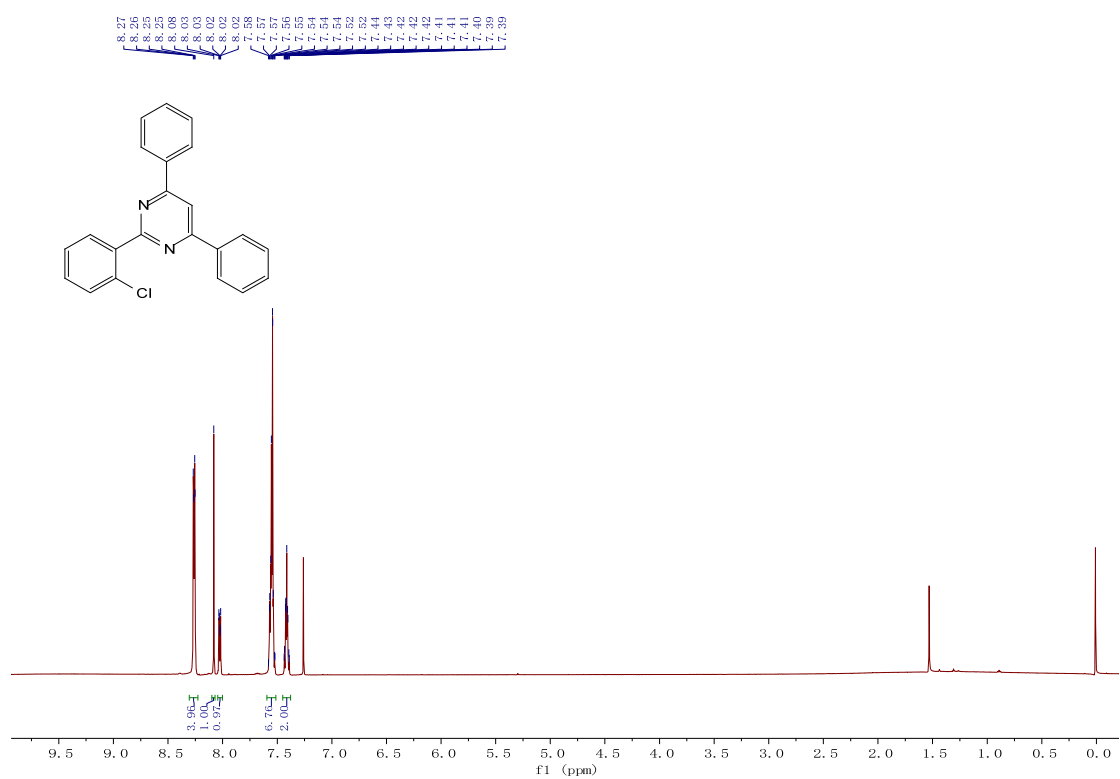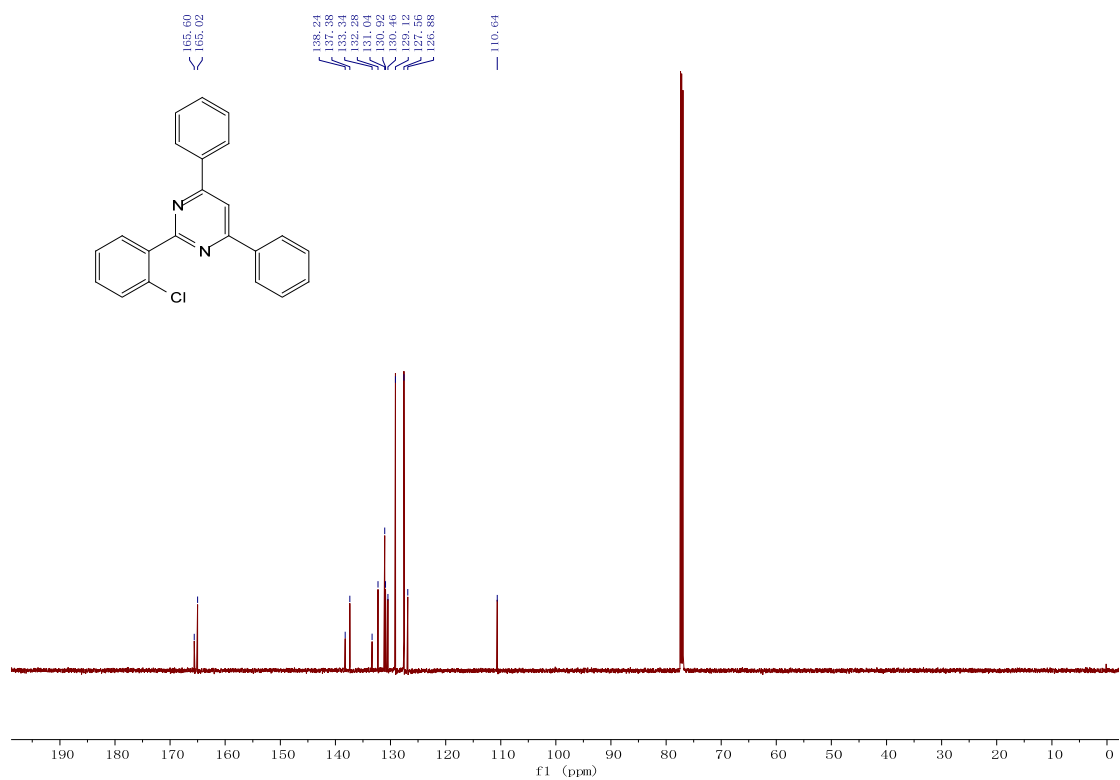

4,6-Diphenyl-2-(pyridin-2-yl)pyrimidine (**3i**)

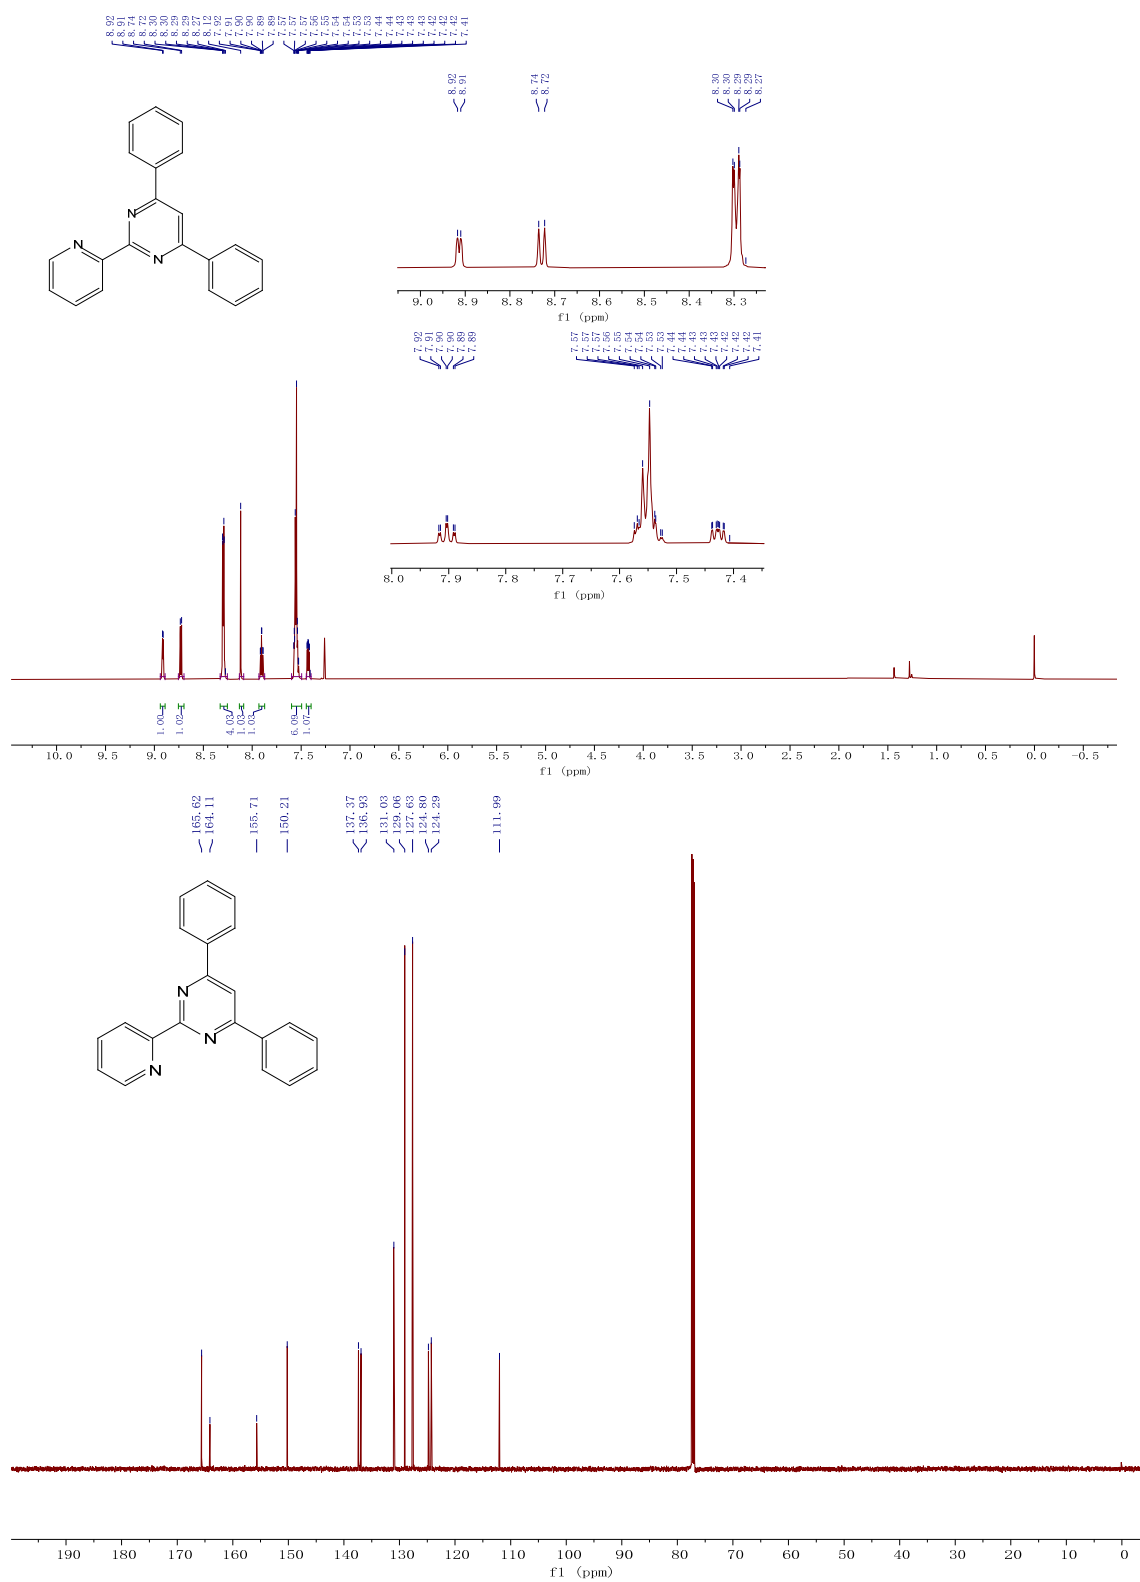

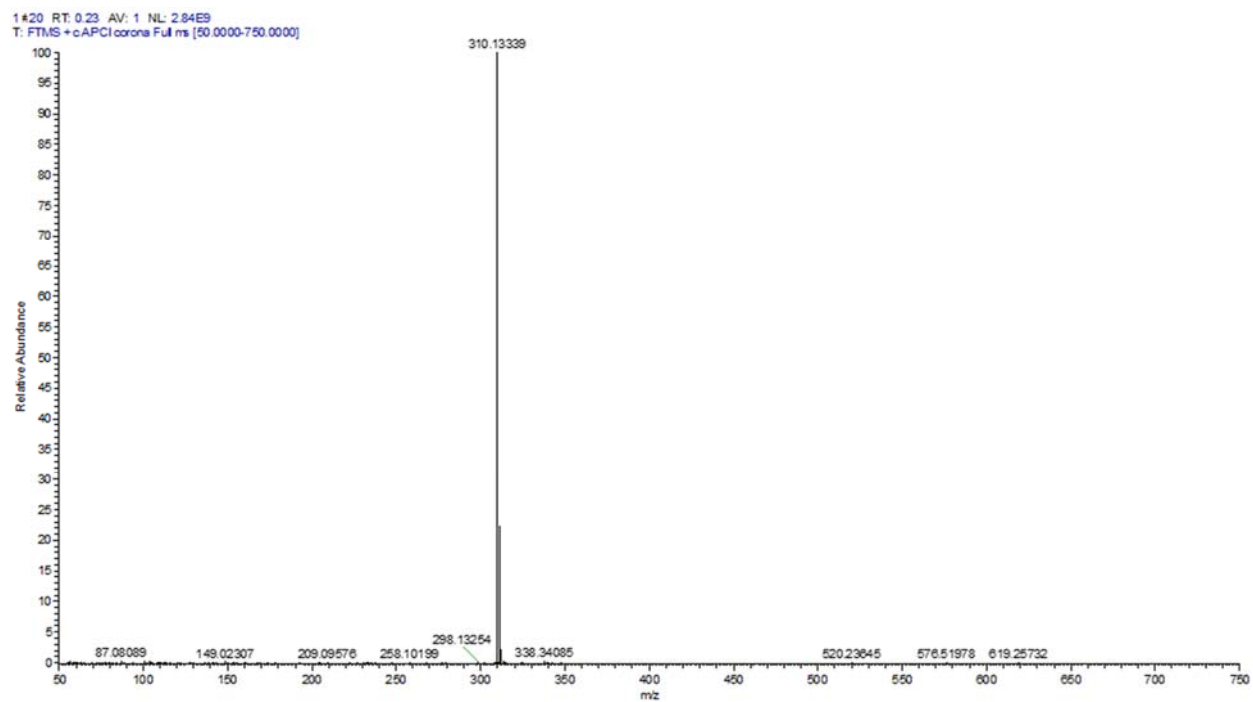

### 2-Methyl-4,6-diphenylpyrimidine (3j)

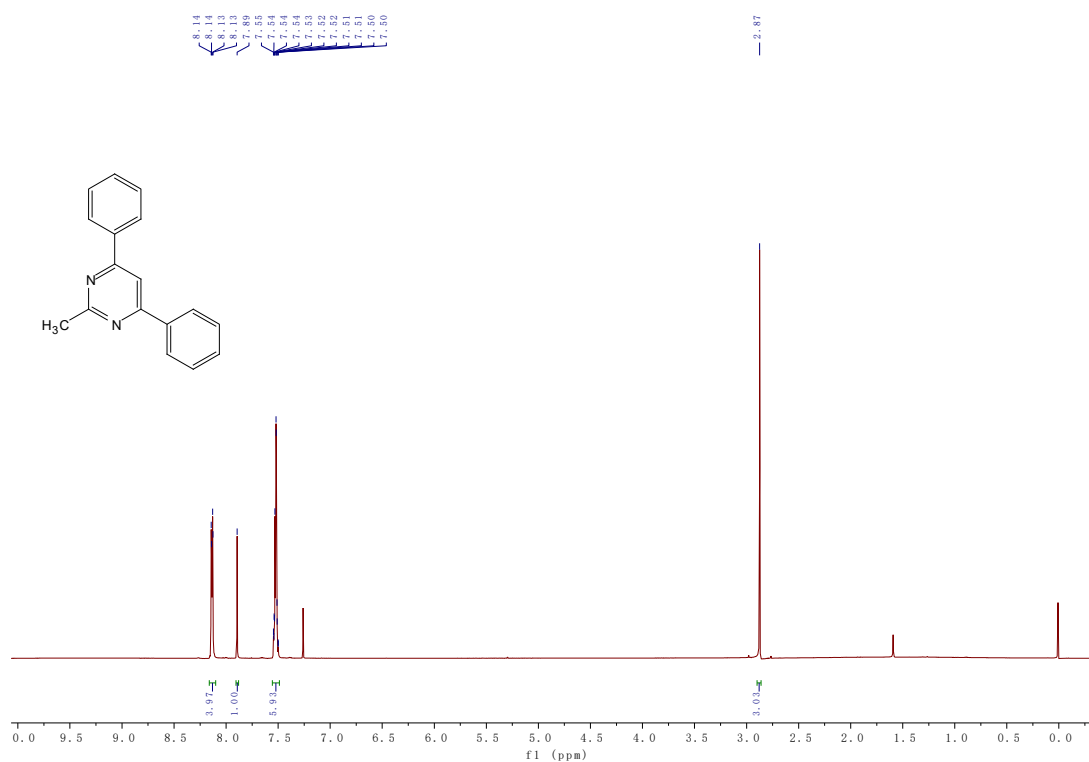

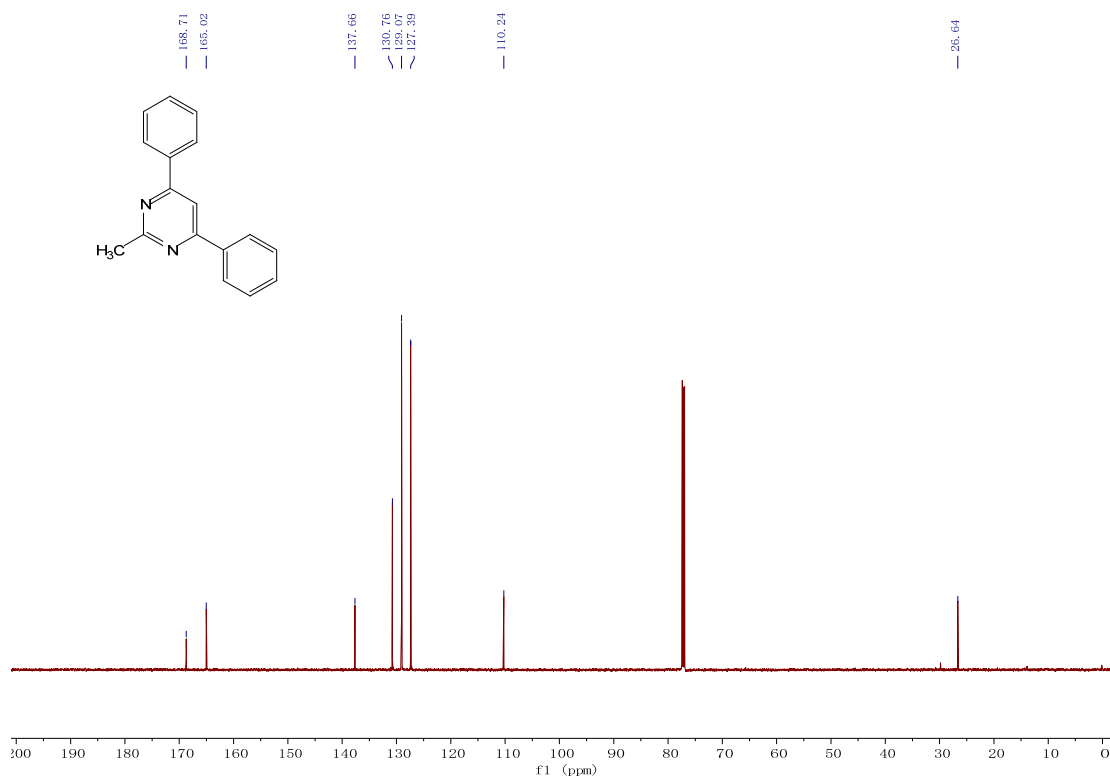

2-Cyclopropyl-4,6-diphenylpyrimidine (**3k**)

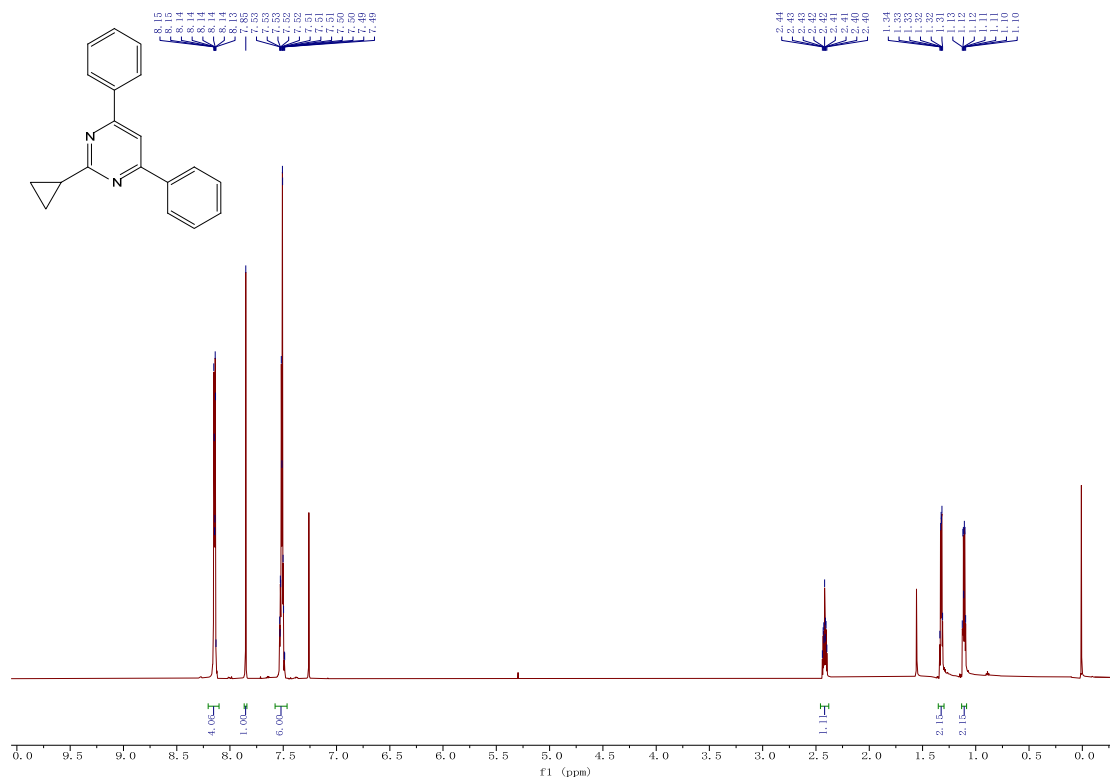

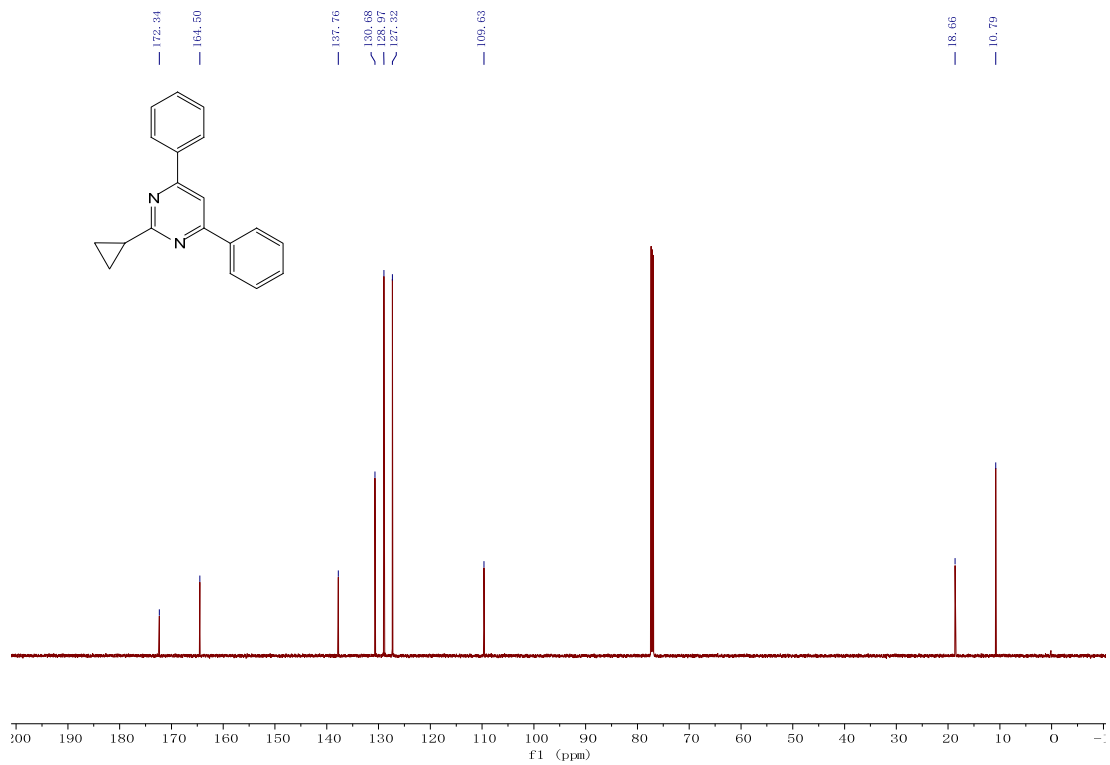

### 4,6-Diphenylpyrimidin-2-amine (31)

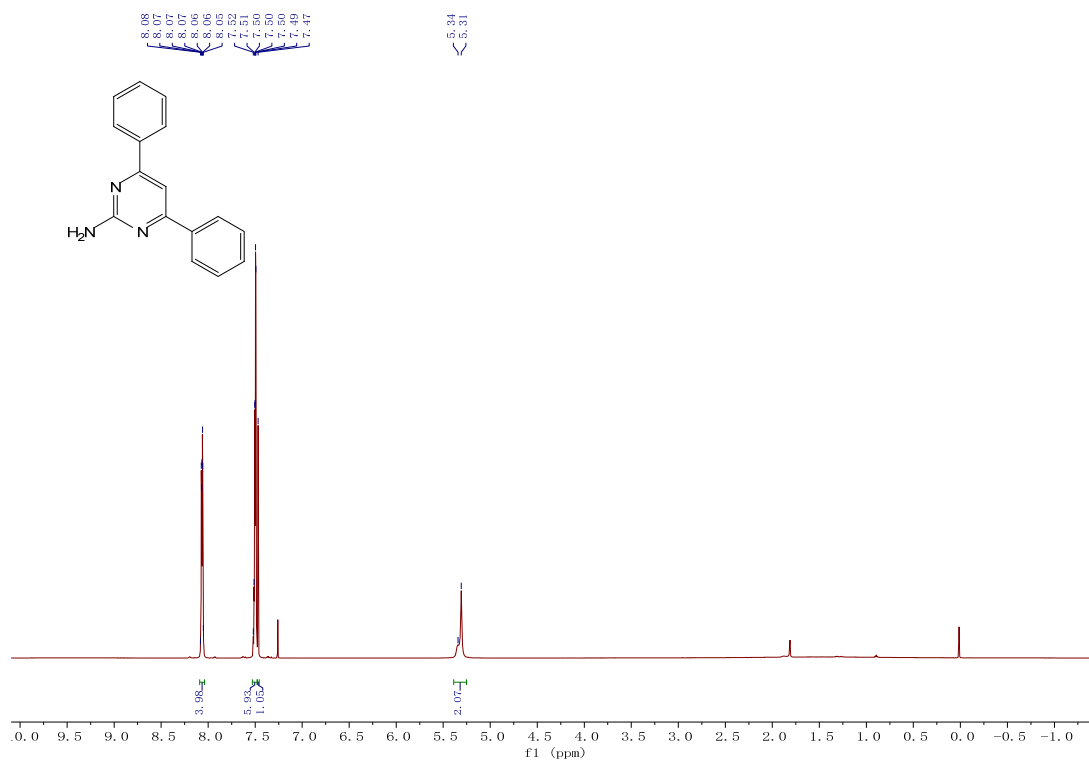

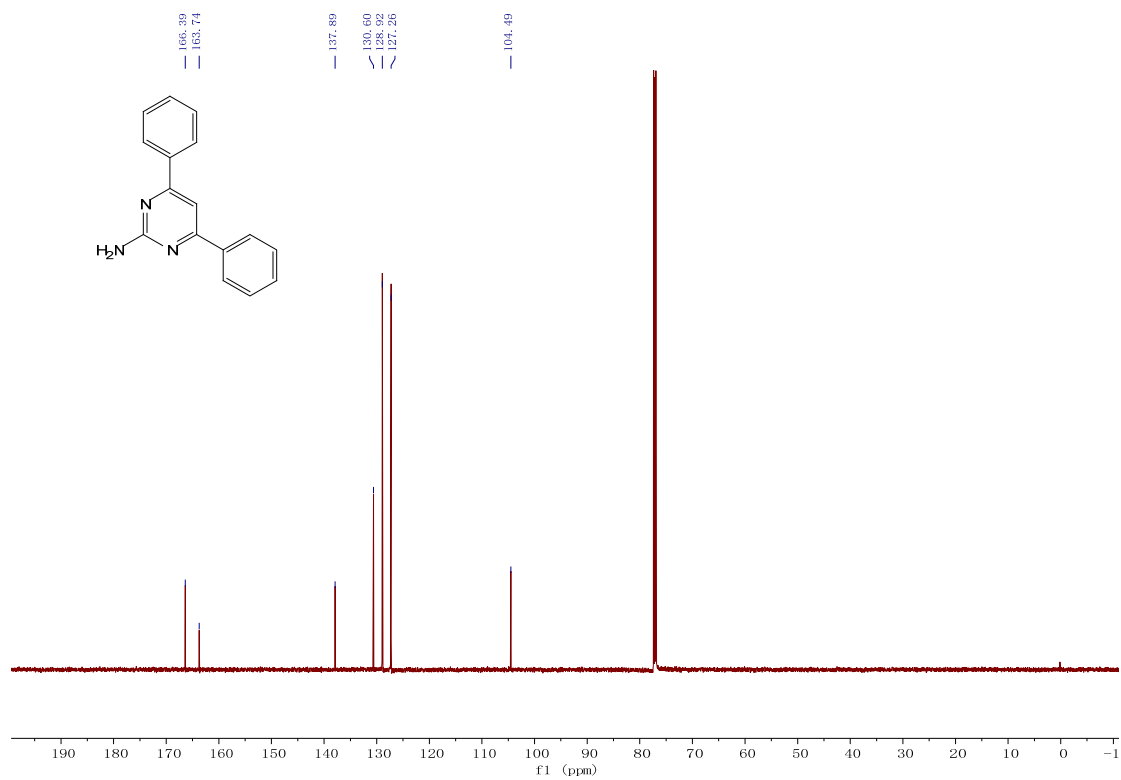

2,4-Diphenyl-6-(*p*-tolyl)pyrimidine (**3ab**)

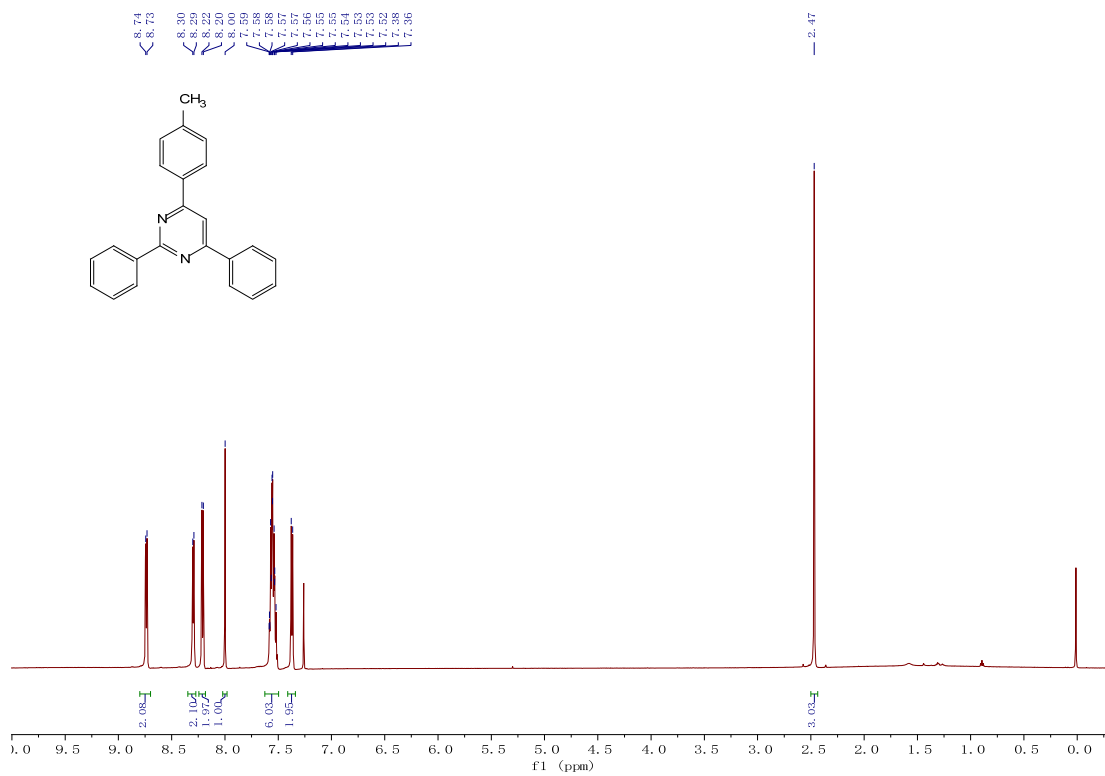

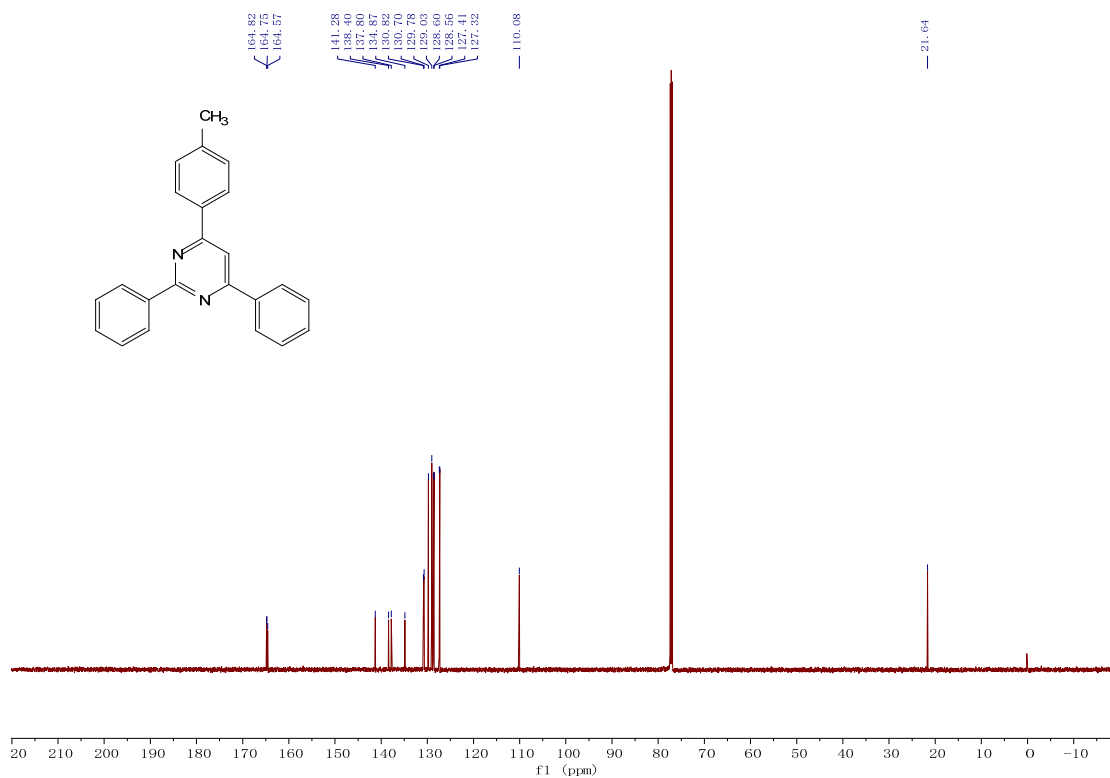

2,4-Diphenyl-6-(*o*-tolyl)pyrimidine (3ac)

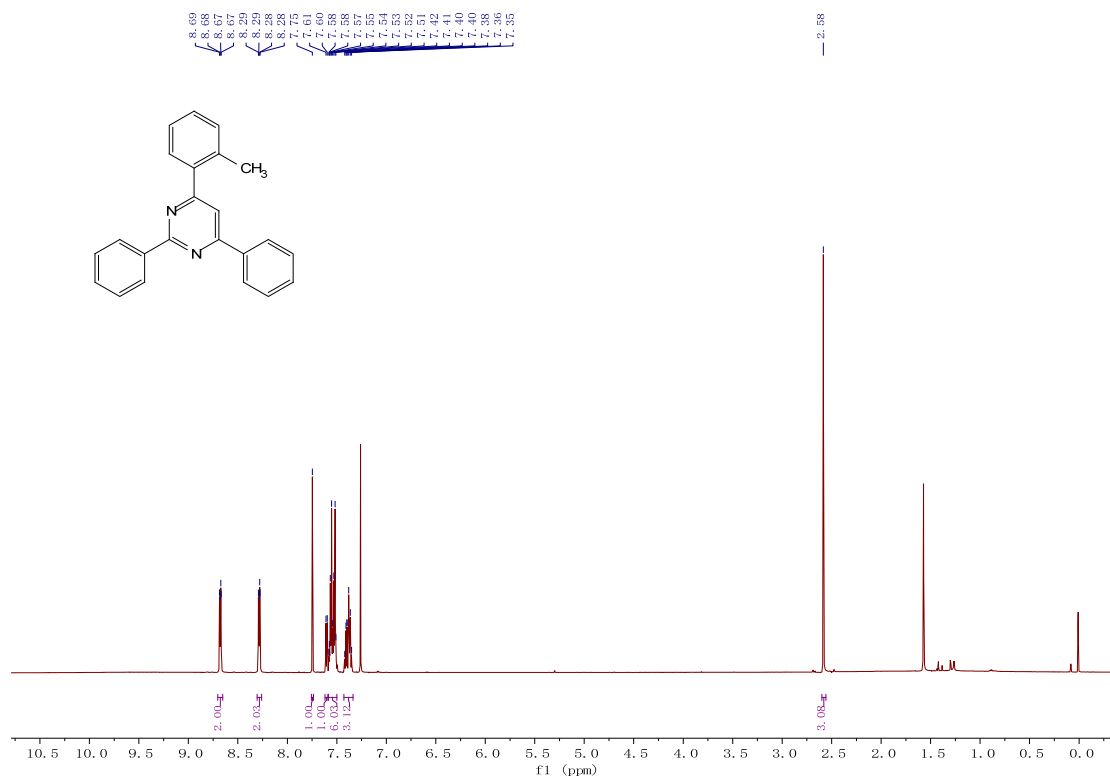

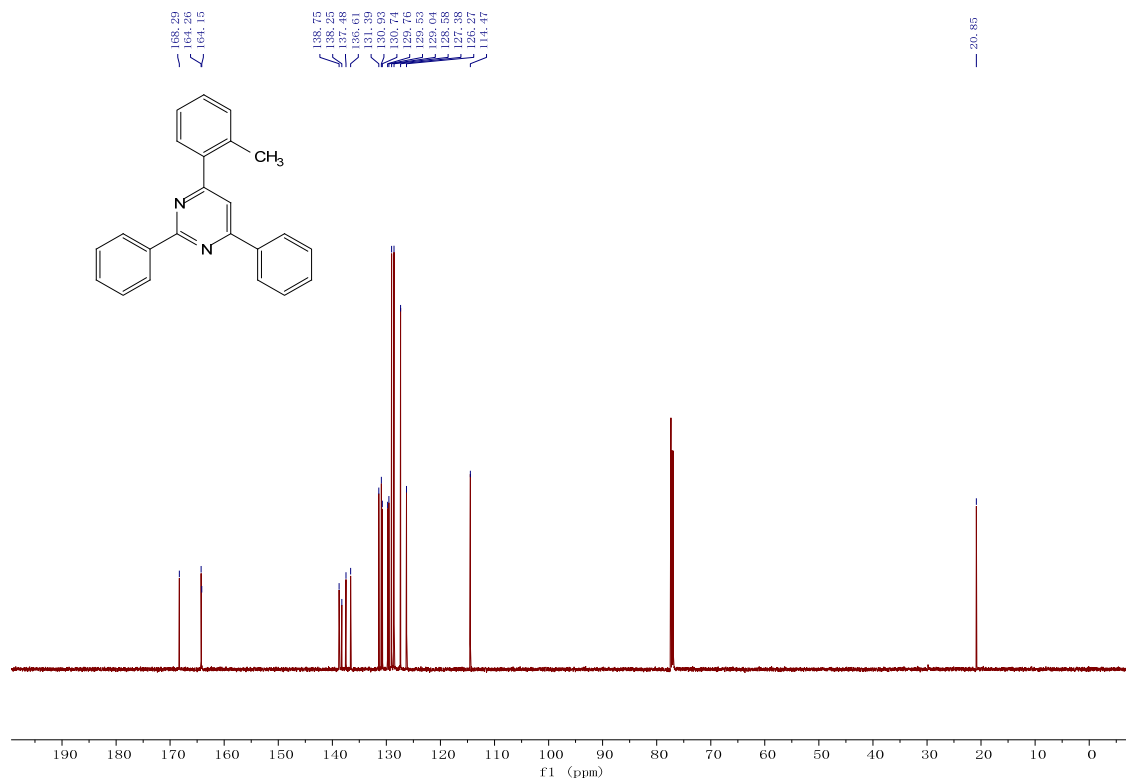

### 2,4-Diphenyl-6-(*m*-tolyl)pyrimidine (3ad)

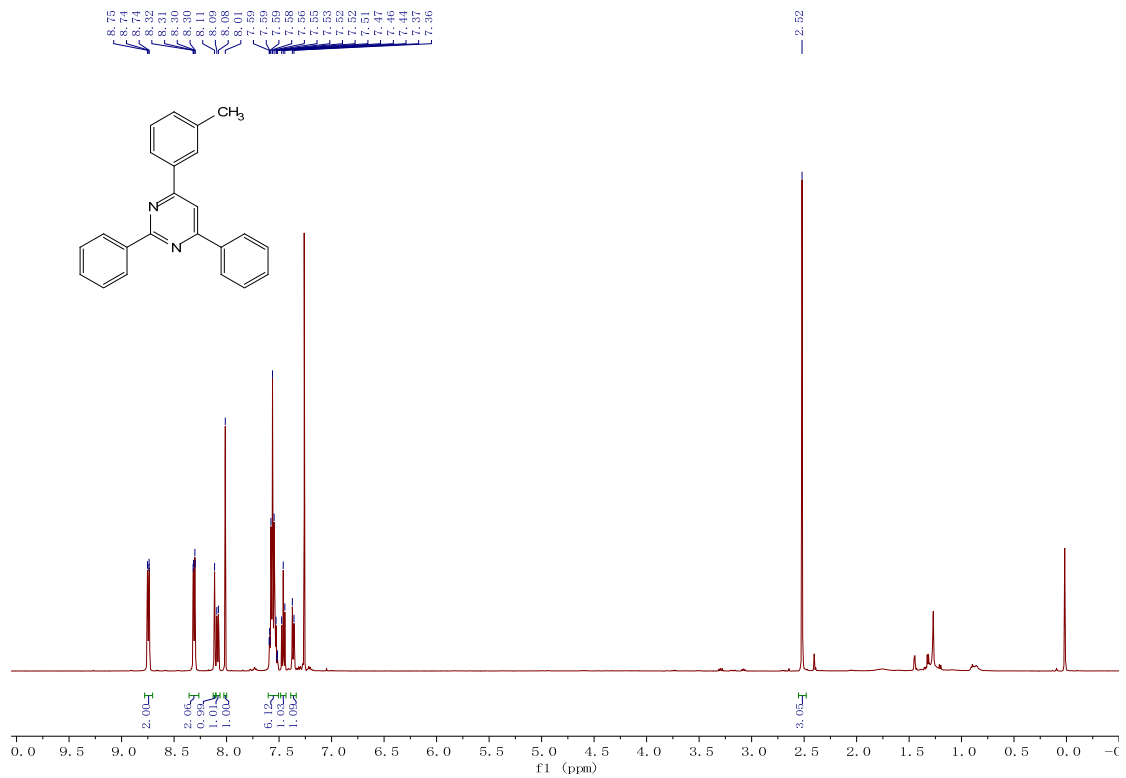



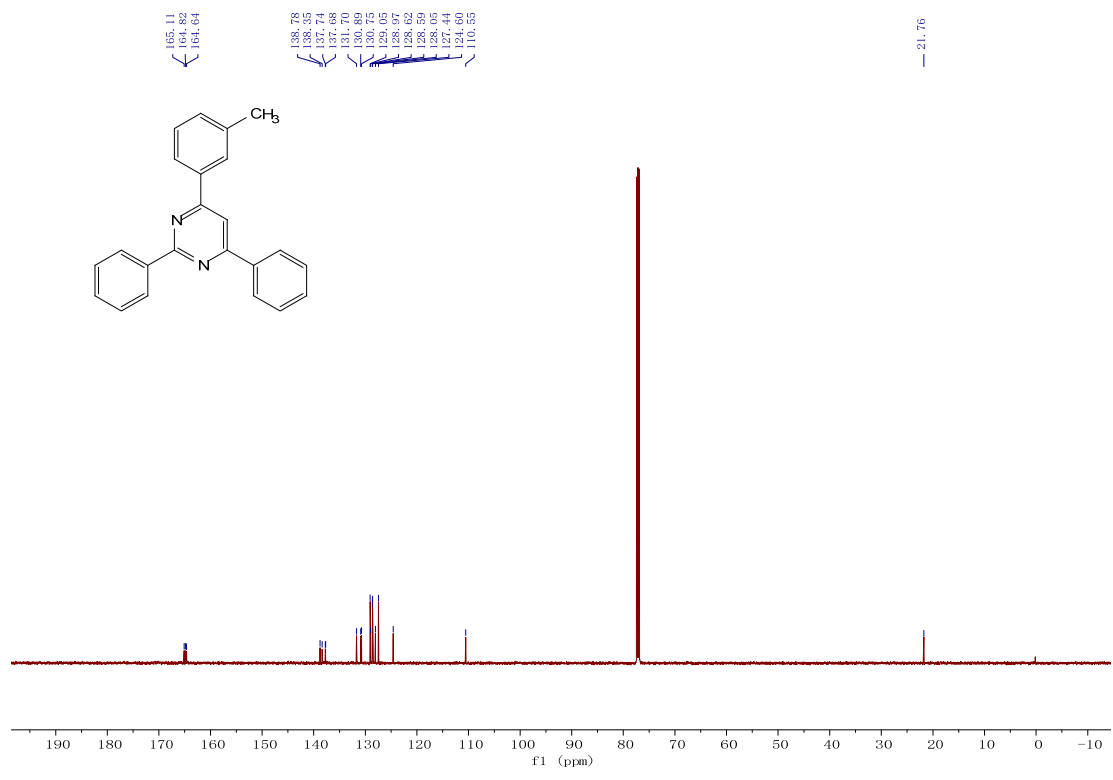

4-(4-Methoxyphenyl)-2,6-diphenylpyrimidine (**3ae**)

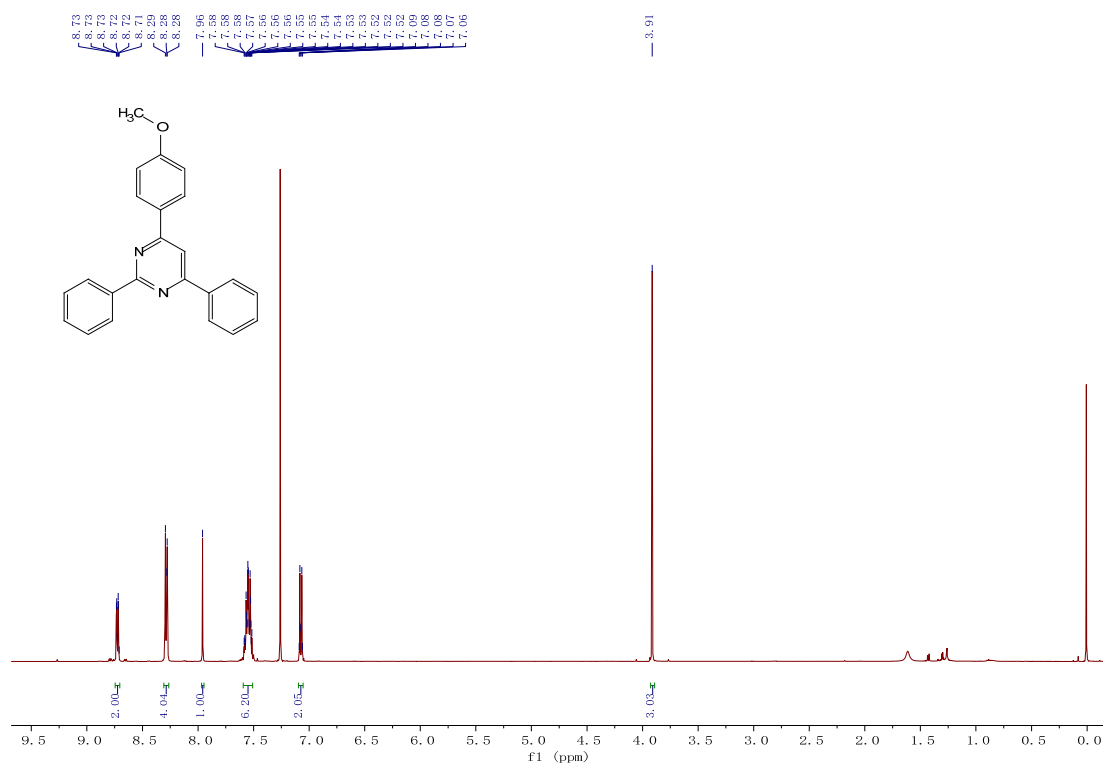

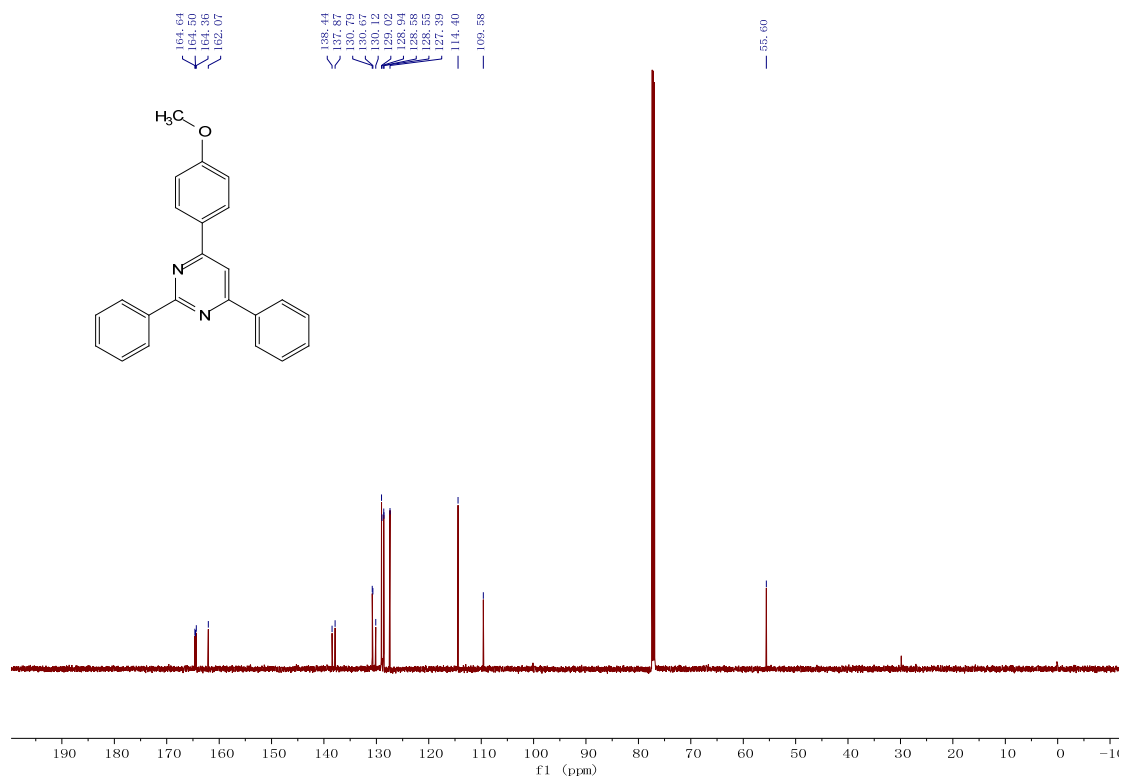

4-([1,1'-Biphenyl]-4-yl)-2,6-diphenylpyrimidine (3af)

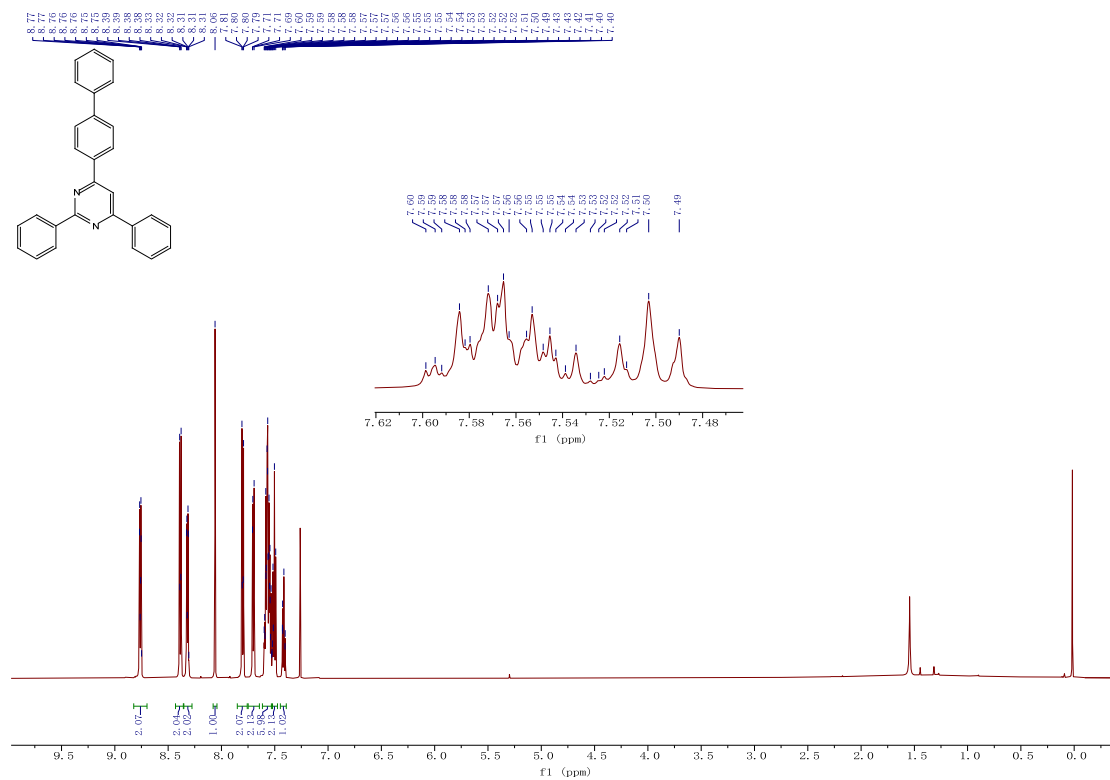

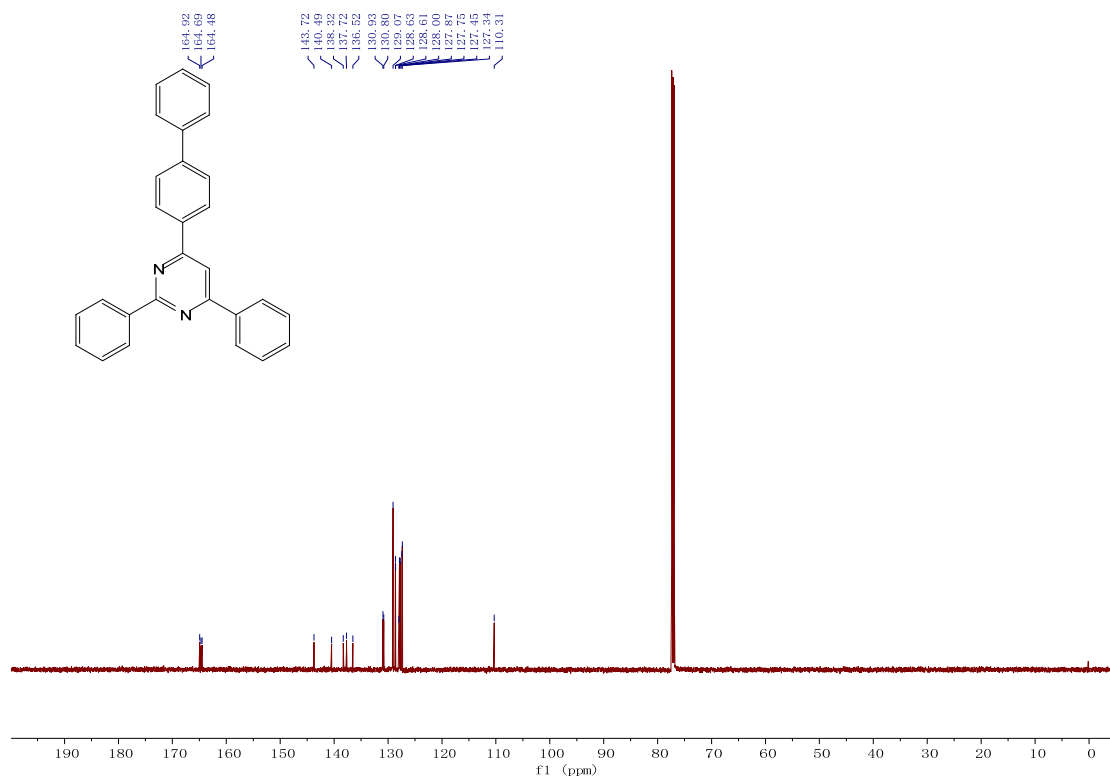

4-(4-Fluorophenyl)-2,6-diphenylpyrimidine (**3ag**)

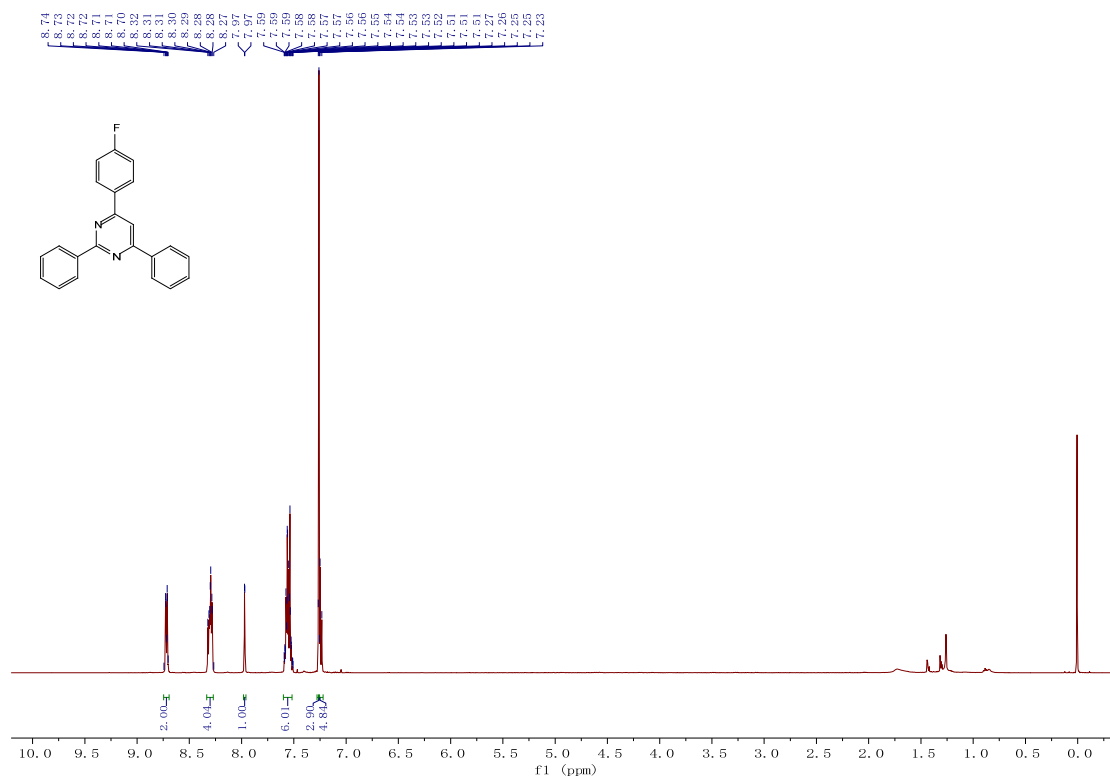

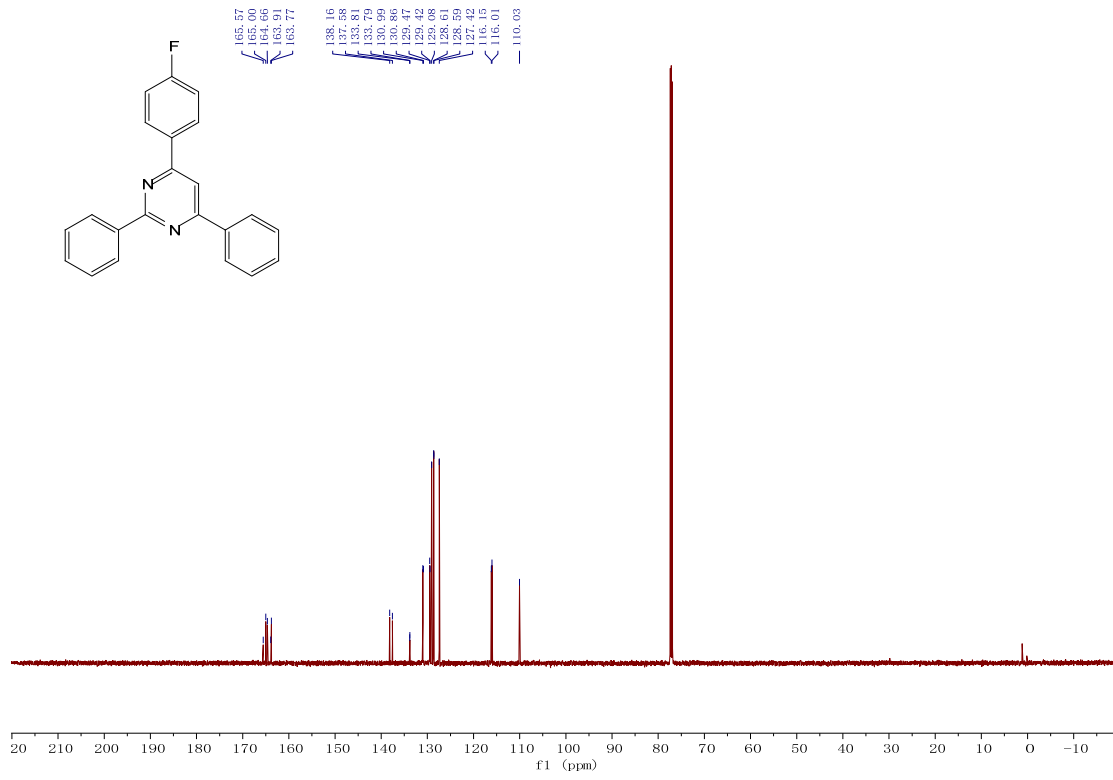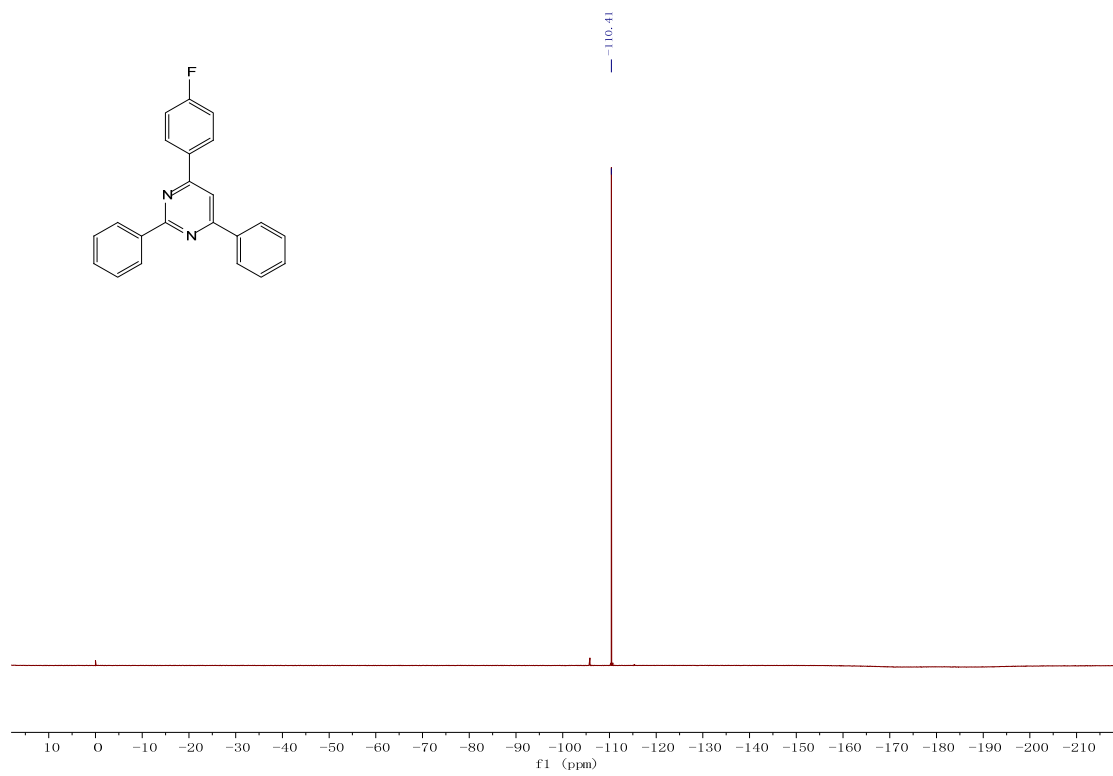

# 4-(4-Chlorophenyl)-2,6-diphenylpyrimidine (3ah)

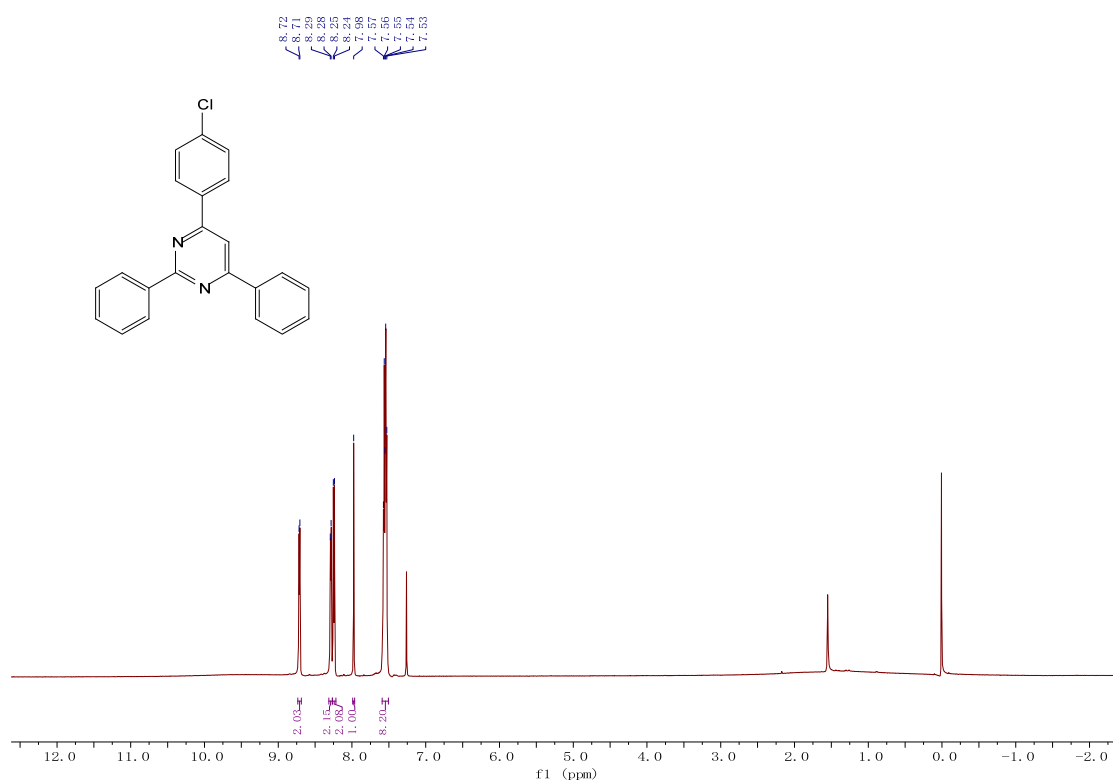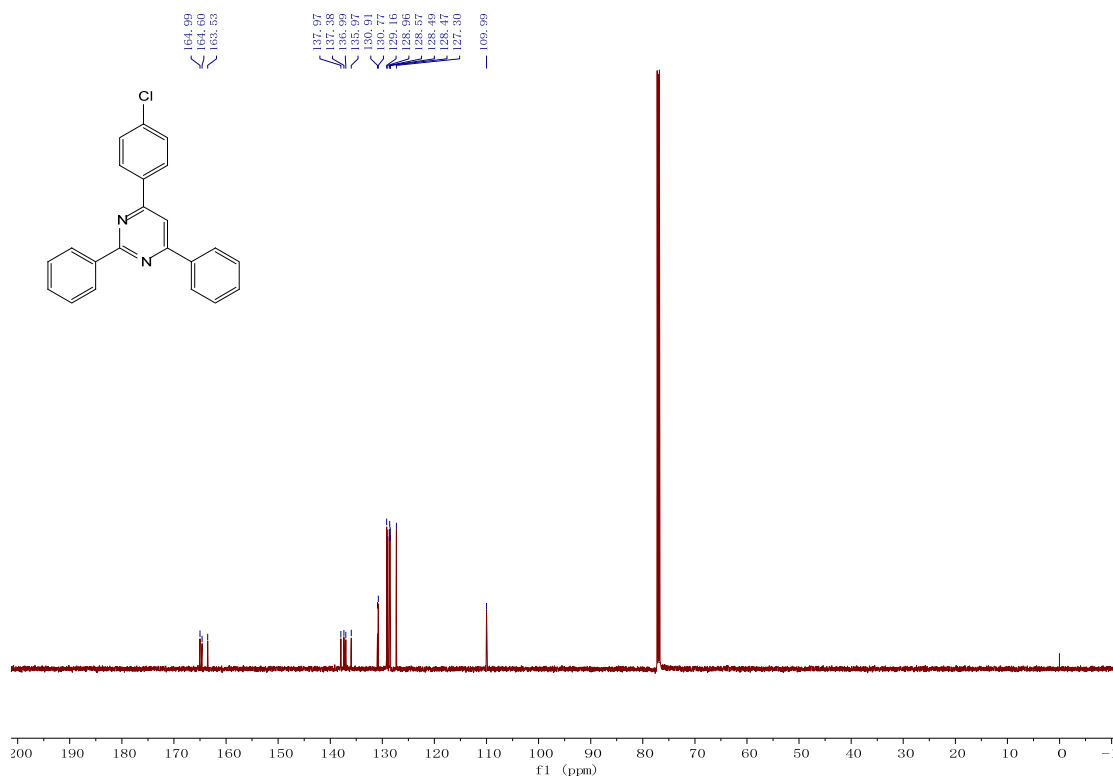



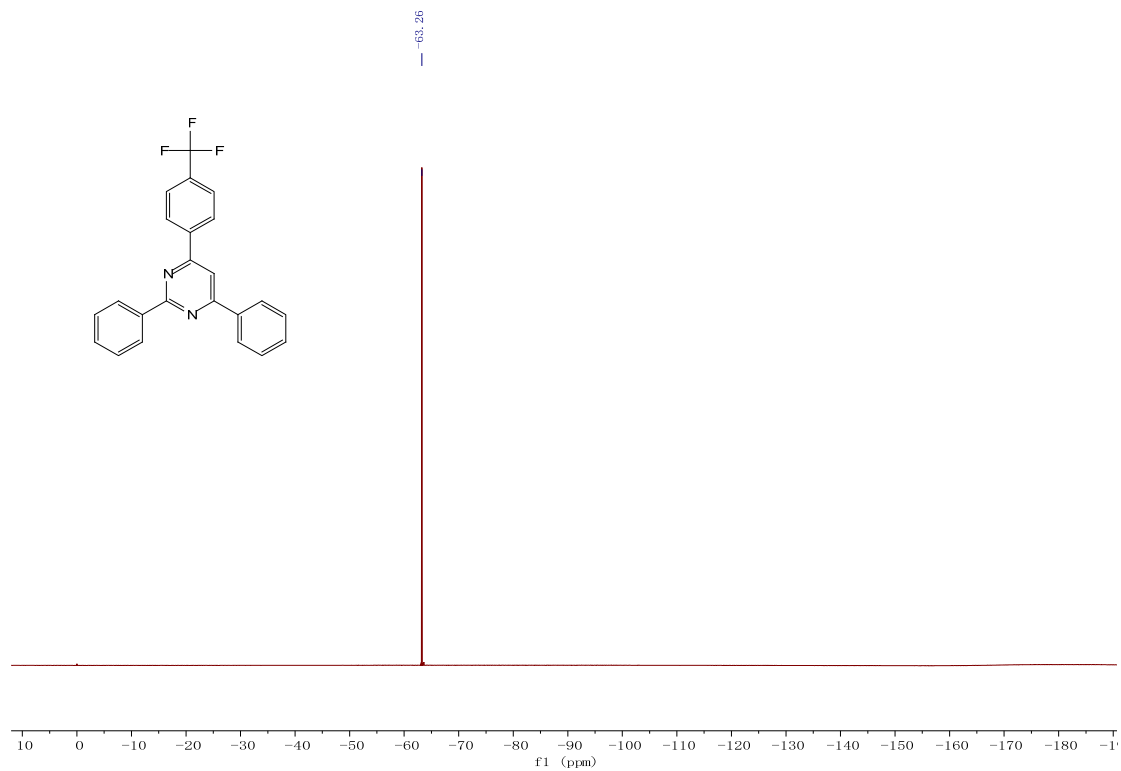

### 4-(Naphthalen-2-yl)-2,6-diphenylpyrimidine (3aj)

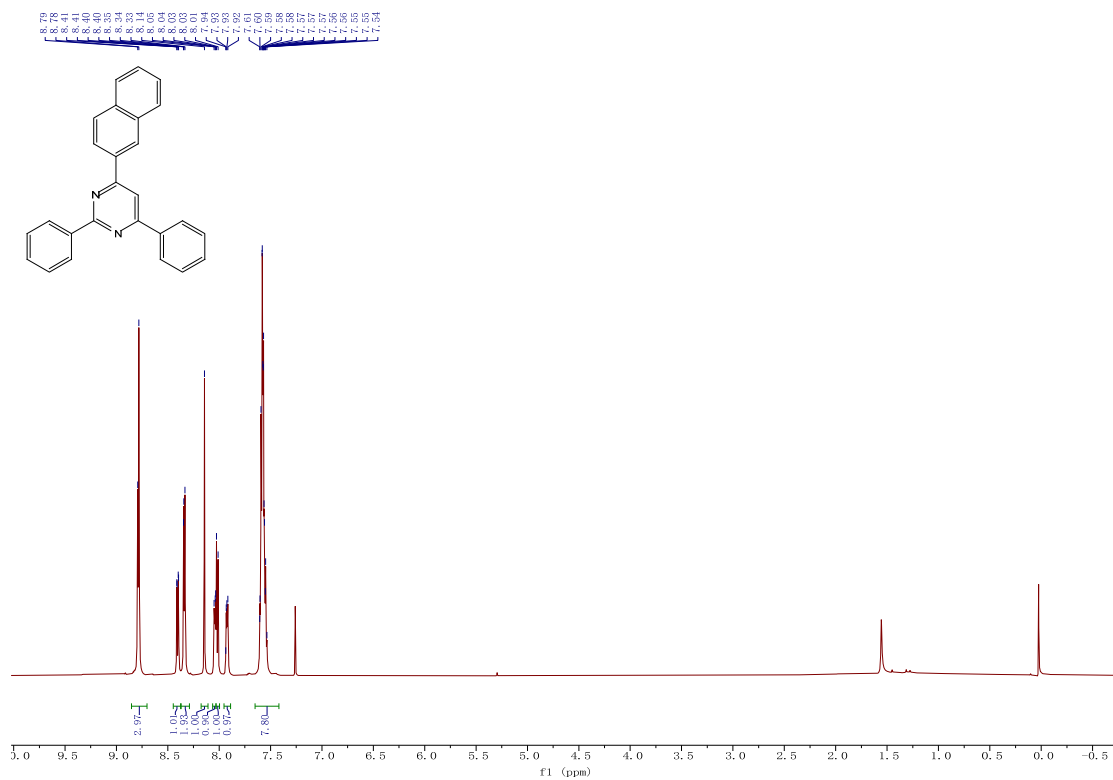





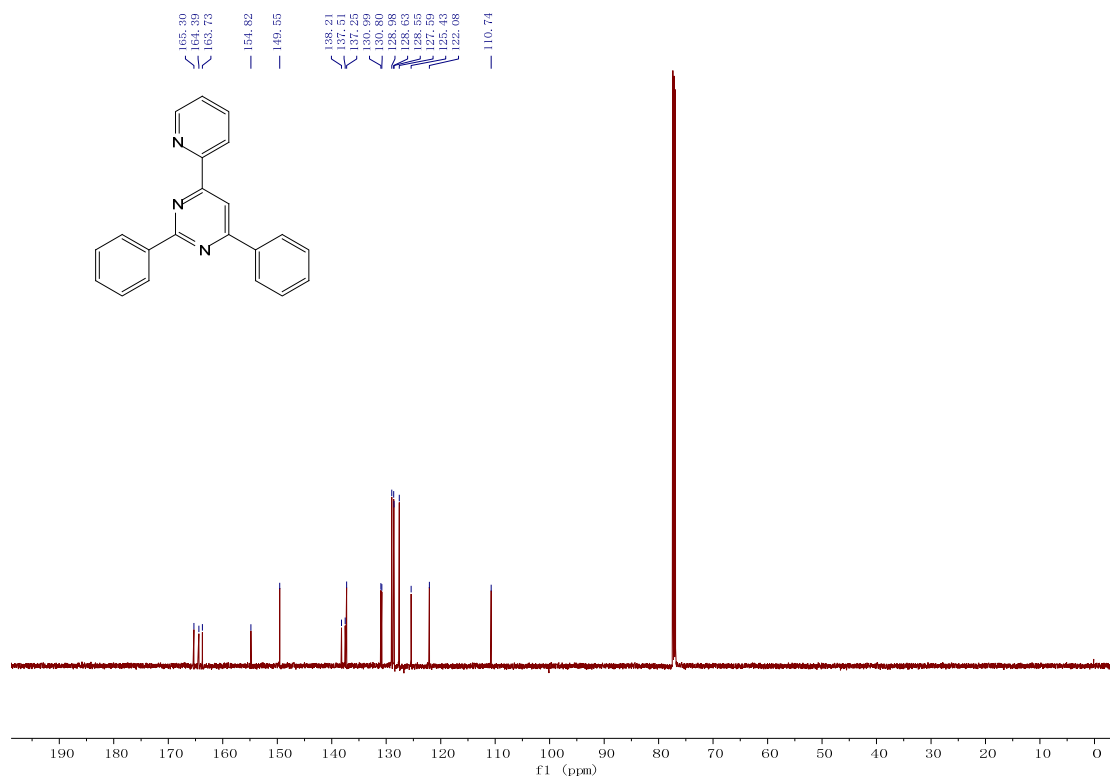

### 4-(Furan-2-yl)-2,6-diphenylpyrimidine (3a)

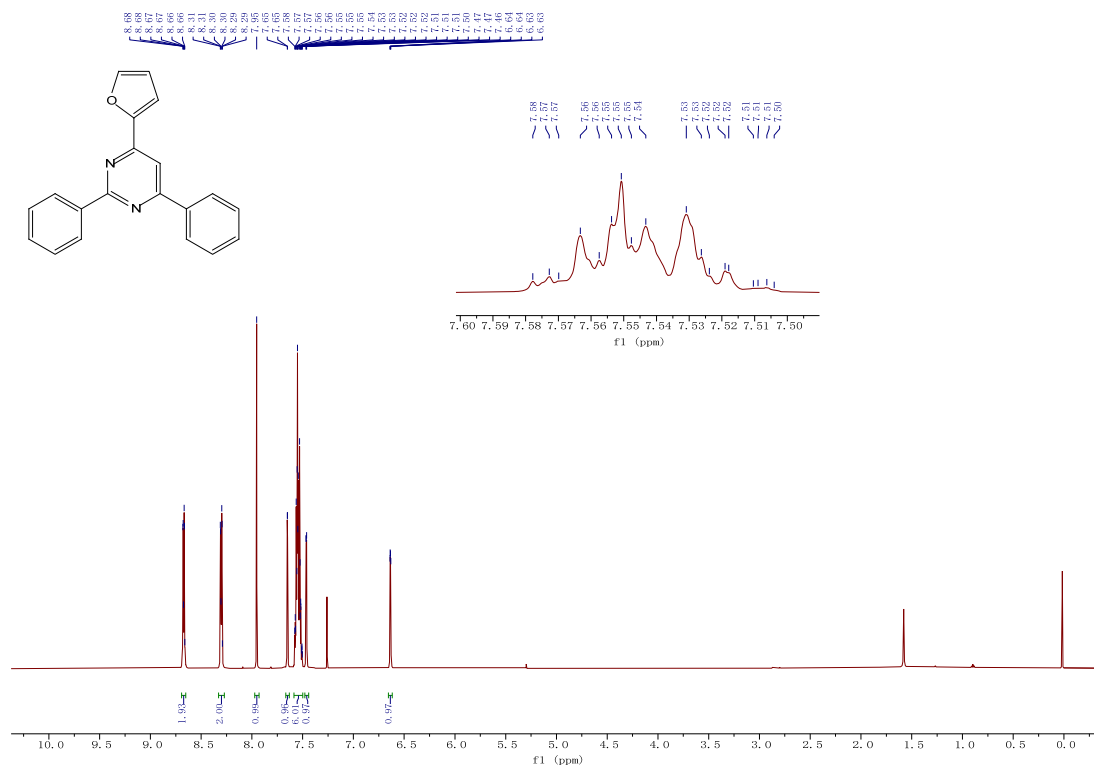

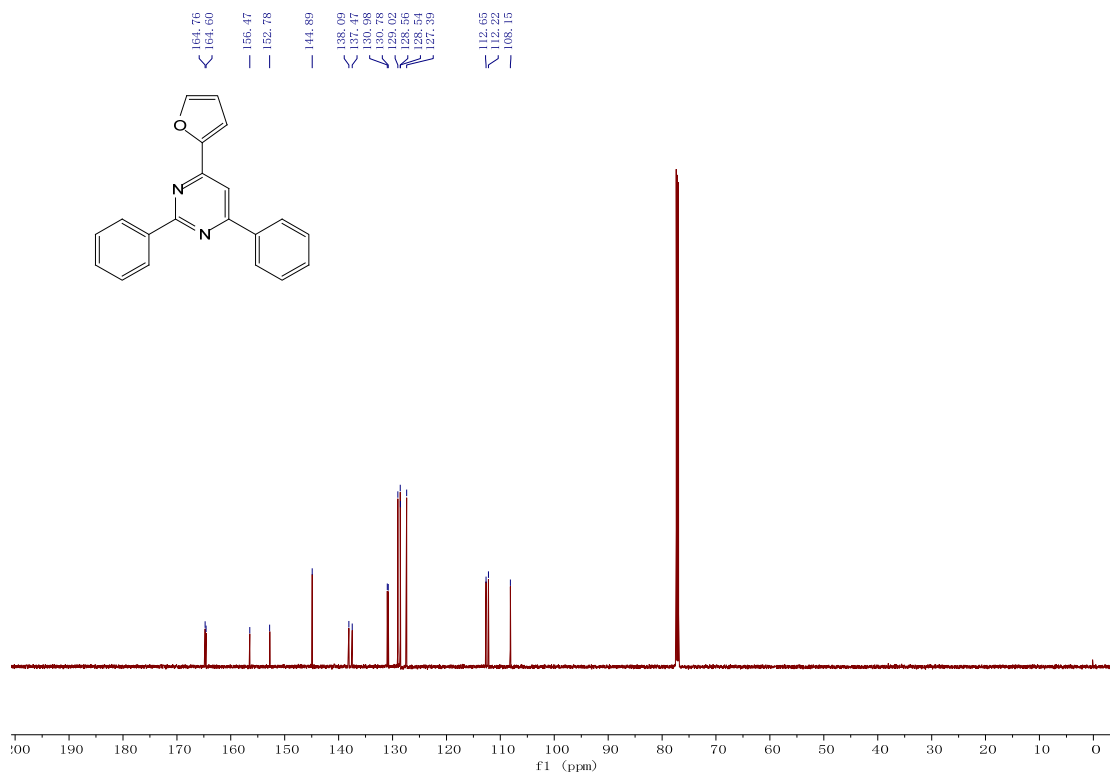

### 2,4-Diphenyl-6-(thiophen-2-yl)pyrimidine (**3am**)

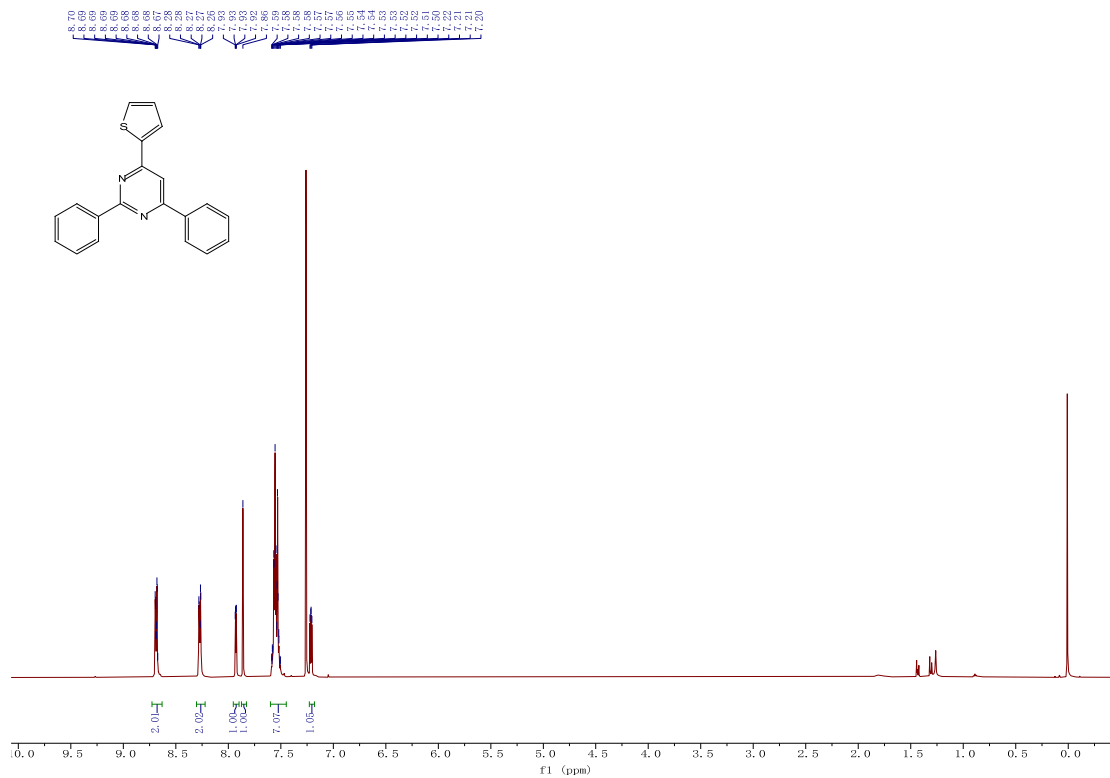

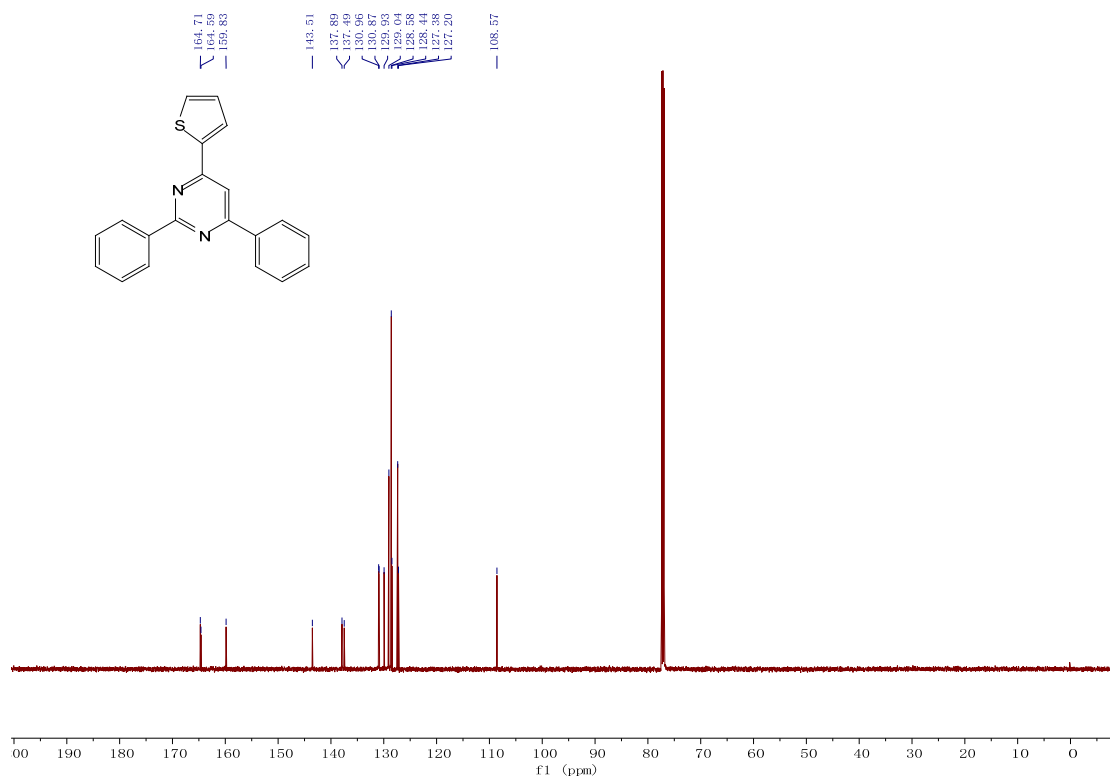

### 4-Methyl-2,6-diphenylpyrimidine (**3an**)

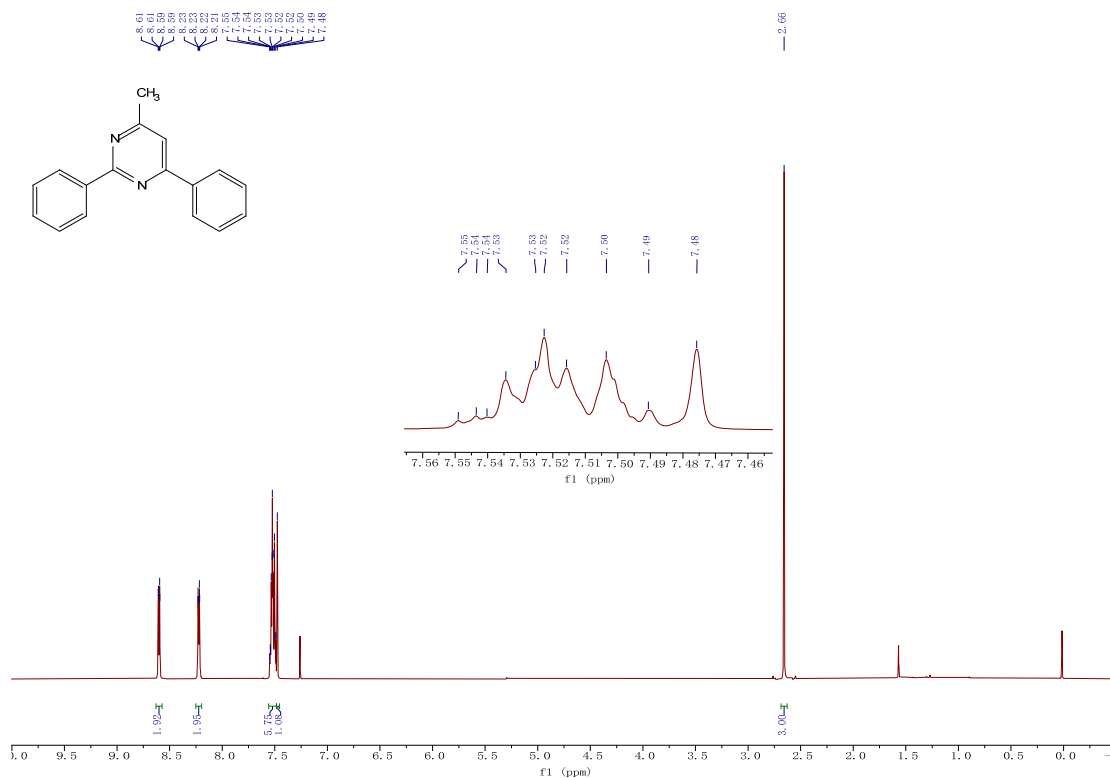



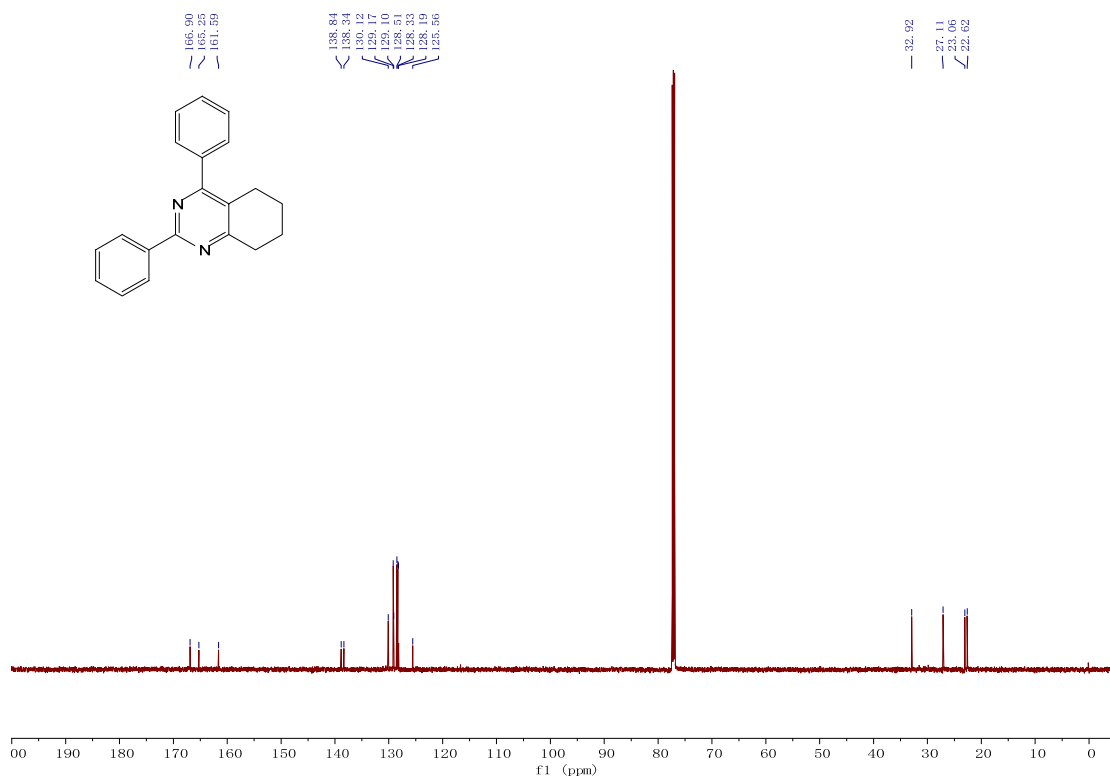

### 5-Methyl-2,4-diphenylpyrimidine (3ap)

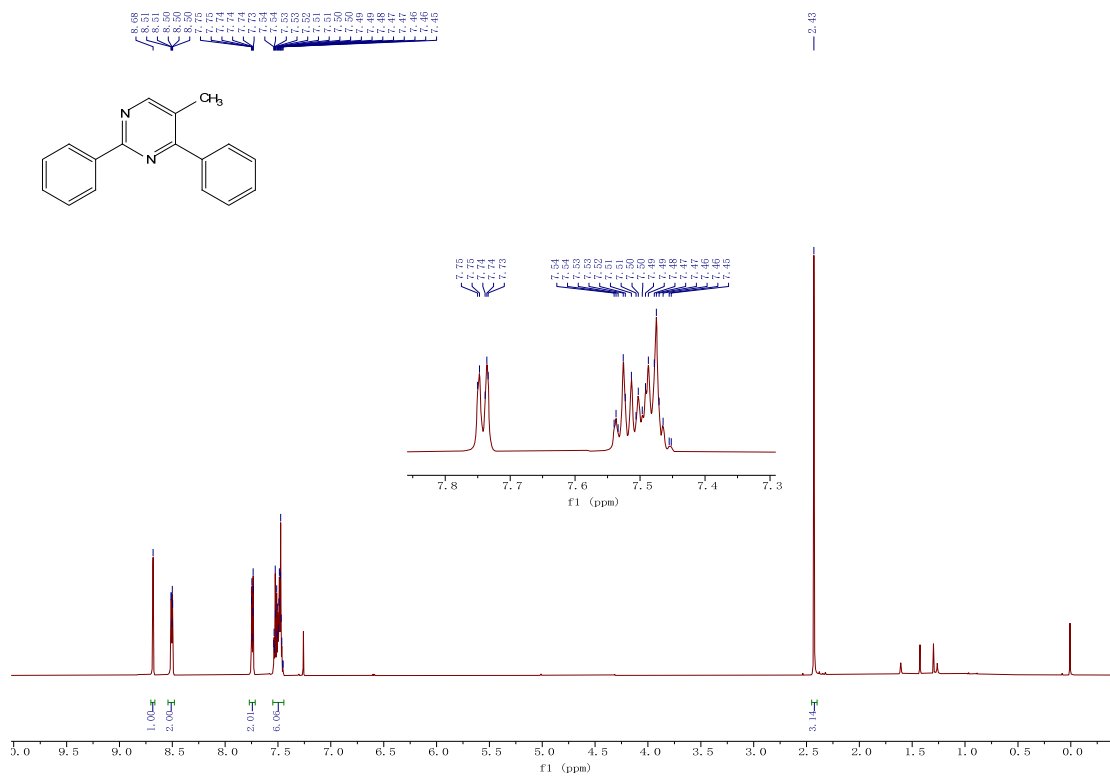

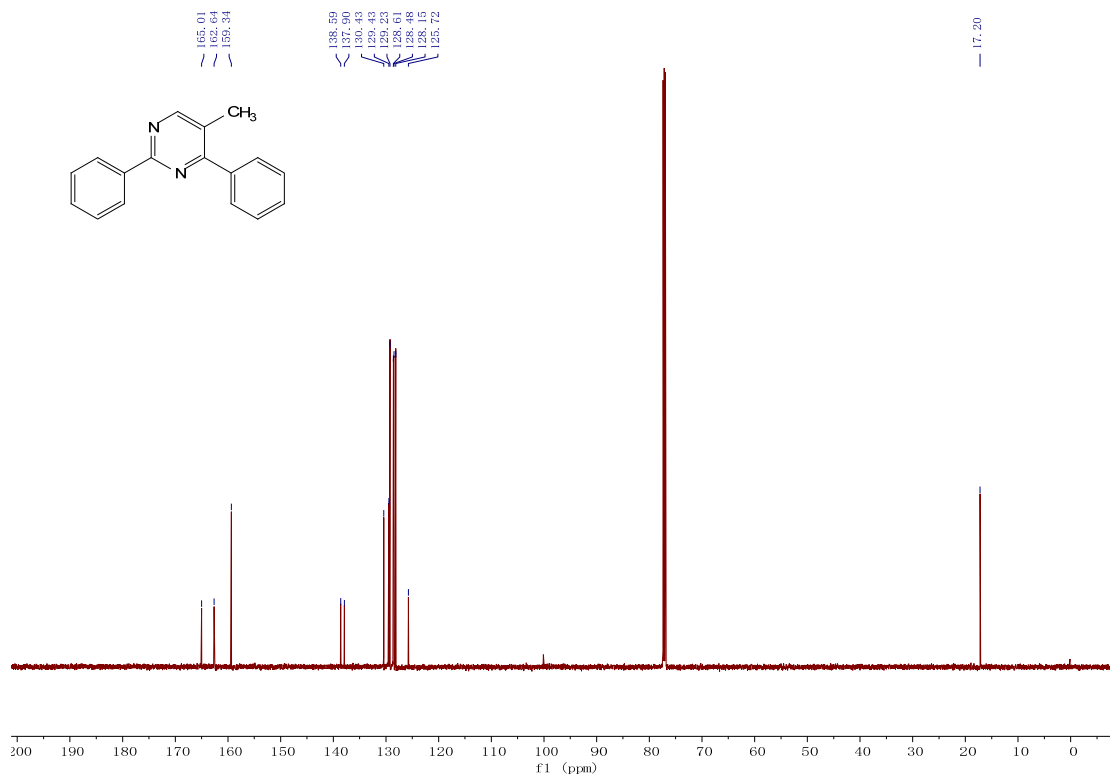

### 2,4-Diphenylpyrimidine (3aq)

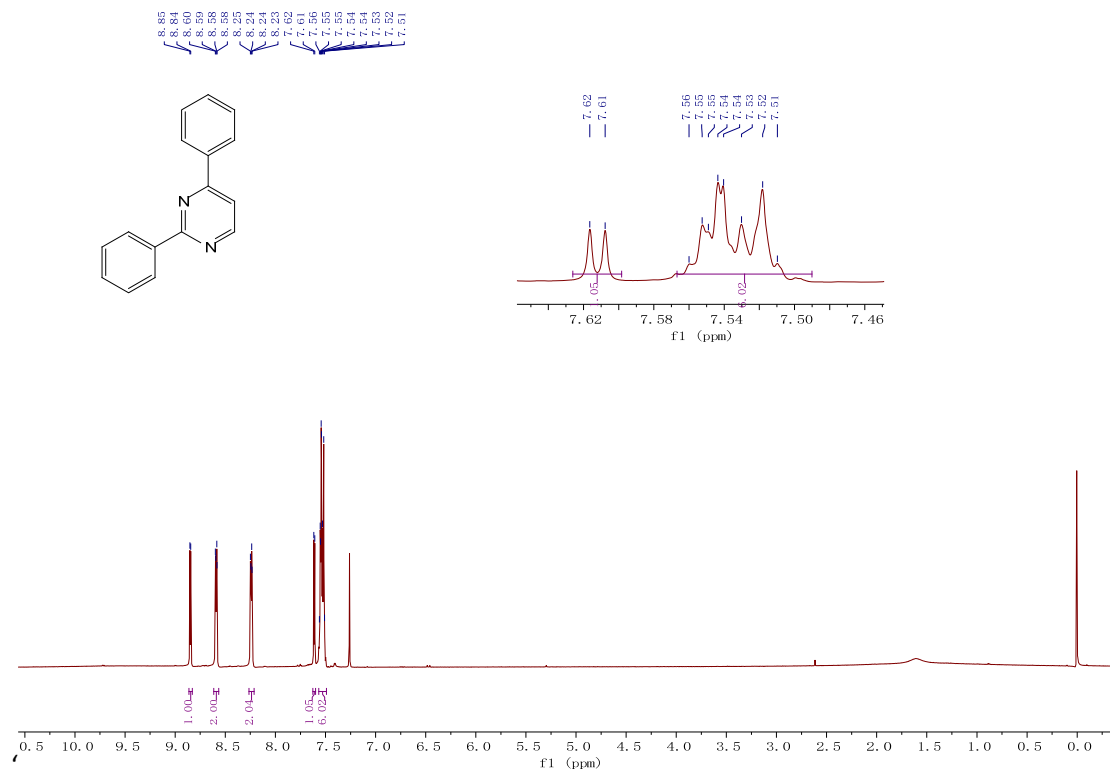

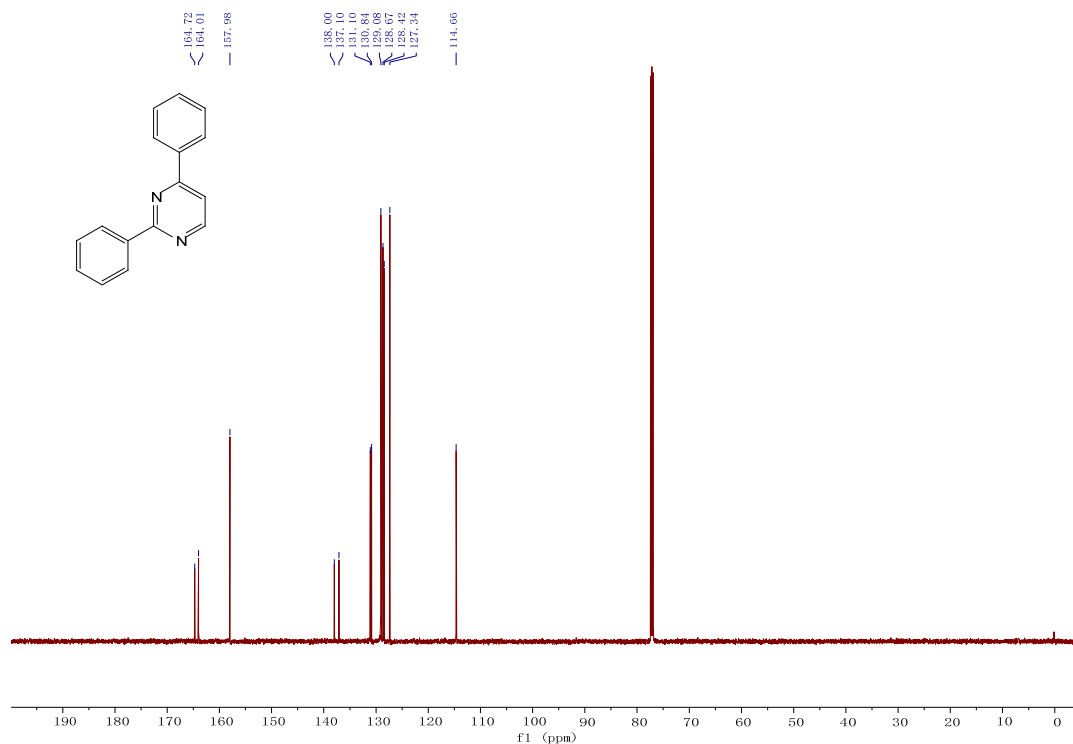

Ethyl 2,6-diphenylpyrimidine-4-carboxylate (**3ar**)

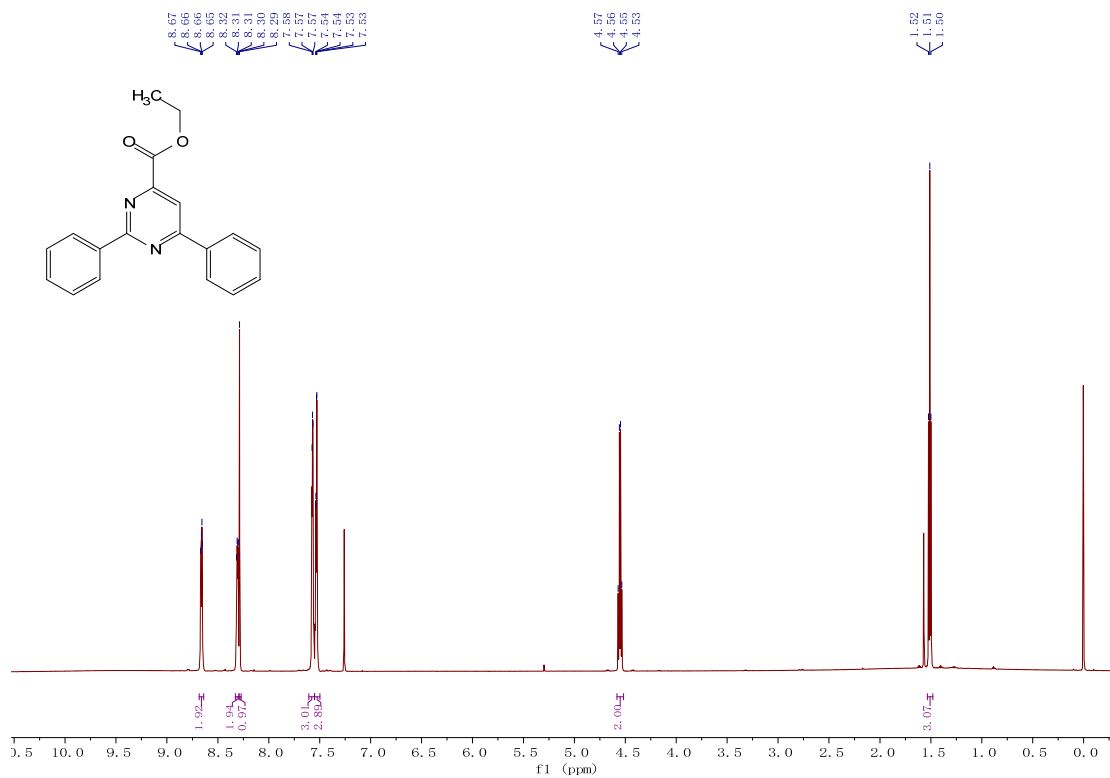

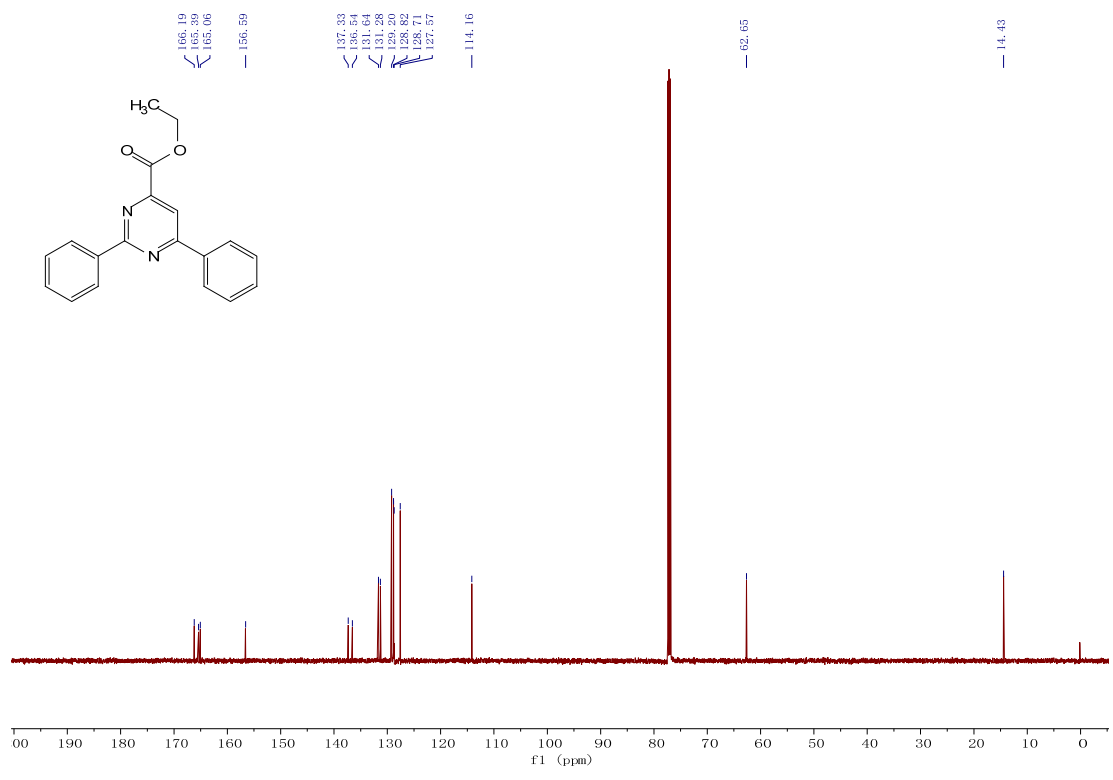

2,4,6-Triphenyl-1,2-dihydropyrimidine (**4a**).

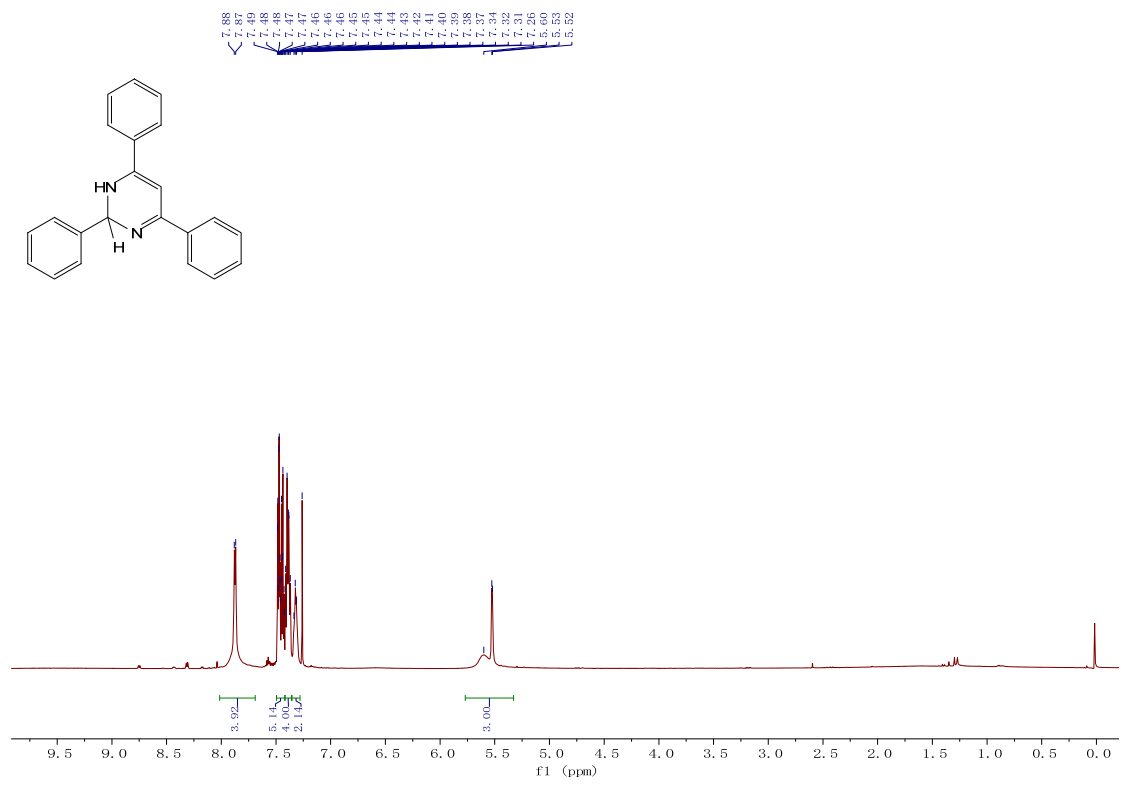



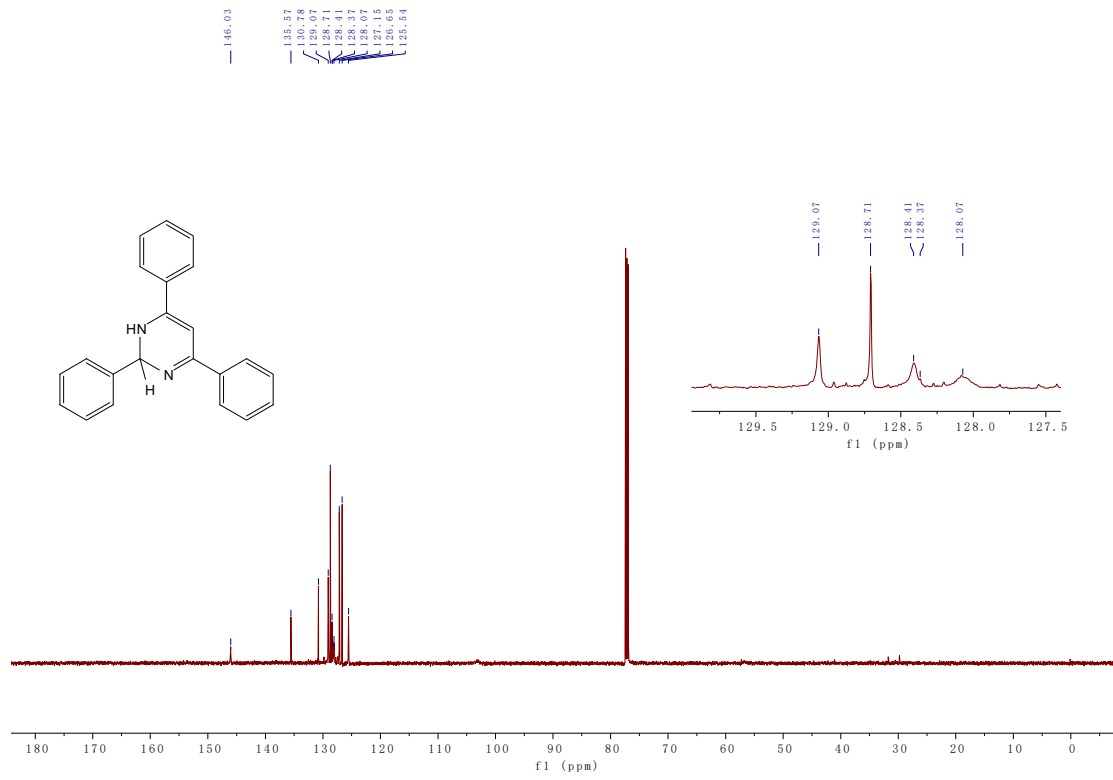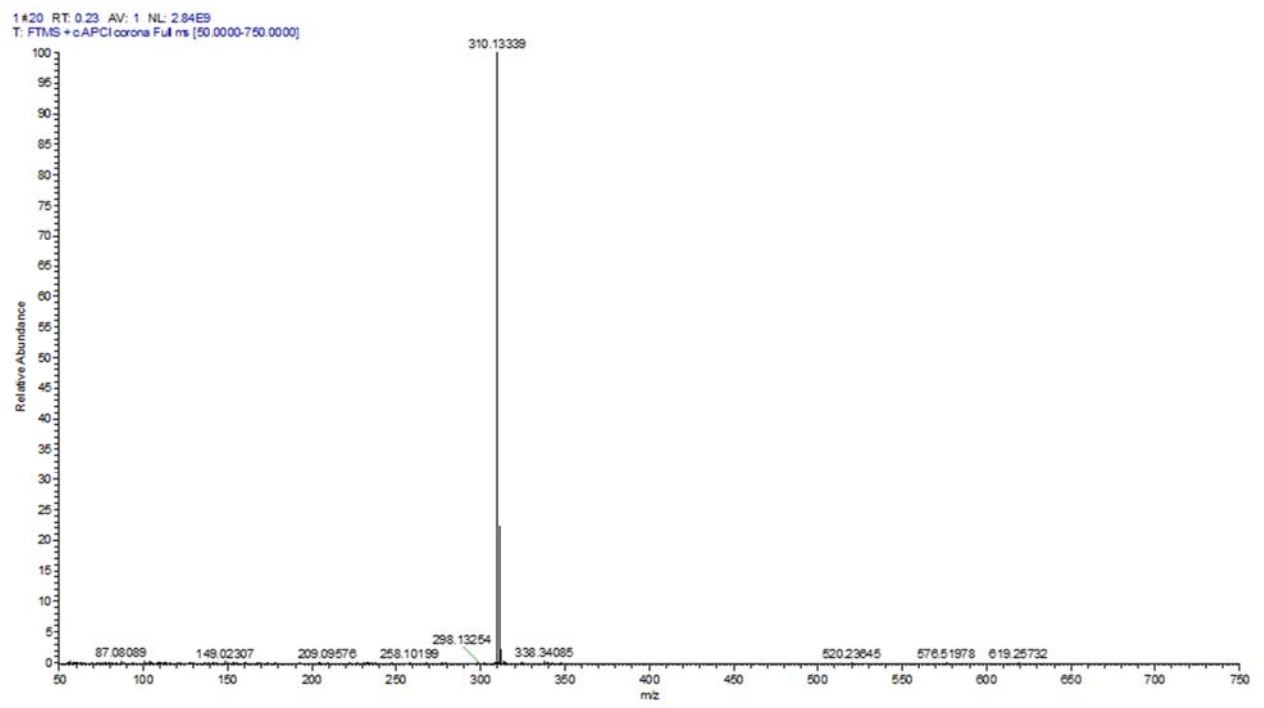

## 8. References

1. Z.-q. Lin, C.-d. Li, Z.-c. Zhou, S. Xue, J.-r. Gao, Q. Ye and Y.-j. Li, *Synlett*, 2019, **30**, 1442-1446.
2. S. Otto, F. Bertocin and J. B. F. N. Engberts, *J. Am. Chem. Soc.*, 1996, **118**, 7702-7707.
3. R. A. Moss, J. Terpinski, D. P. Cox, D. Z. Denny and K. Krogh-Jespersen, *J. Am. Chem. Soc.*, 1985, **107**, 2743-2748.
4. S. M. Treacy and T. Rovis, *J. Am. Chem. Soc.*, 2021, **143**, 2729-2735.
5. J. Yuan, J. Li, B. Wang, S. Sun and J. Cheng, *Tetrahedron Lett.*, 2017, **58**, 4783-4785.
6. K. Itami, D. Yamazaki and J.-i. Yoshida, *J. Am. Chem. Soc.*, 2004, **126**, 15396-15397.
7. T. Shi, F. Qin, Q. Li and W. Zhang, *Org. Biomol. Chem.*, 2018, **16**, 9487-9491.
8. P. Wu, X. Zhang and B. Chen, *Tetrahedron Lett.*, 2019, **60**, 1103-1107.
9. Y. Ding, Y. Ma and J. Chen, *Chin. J. Org. Chem.*, 2020, **40**.
10. K.-H. Kong, Y. Chen, X. Ma, W. K. Chui and Y. Lam, *J. Comb. Chem.*, 2004, **6**, 928-933.
11. J. Chen, H. Meng, F. Zhang, F. Xiao and G.-J. Deng, *Green Chem.*, 2019, **21**, 5201-5206.
12. M. Maji and S. Kundu, *Dalton Trans.*, 2019, **48**, 17479-17487.
13. A. K. Bains, Y. Ankit and D. Adhikari, *ChemSusChem*, 2021, **14**, 324-329.
14. S. Sultana Poly, S. M. A. H. Siddiki, A. S. Touchy, K. W. Ting, T. Toyao, Z. Maeno, Y. Kanda and K.-i. Shimizu, *ACS Catal.*, 2018, **8**, 11330-11341.
15. M. M. Zhang, Z. Z. Zhan, M. Wang, H. S. Wang and G. S. Huang, *ChemistrySelect*, 2021, **6**, 13627-13632.
16. Z.-C. Wu and D. L. Boger, *J. Am. Chem. Soc.*, 2019, **141**, 16388-16397.
17. A. Wang, X. Liu, Y. Kong, J. Wang and T.-S. Jiang, *Org. Chem. Front.*, 2021, **8**, 947-952.
18. Z. Qin, Y. Ma and F. Li, *J. Org. Chem.*, 2021, **86**, 13734-13743.
19. S. Sun, J. Huang, C. Yuan, G. Wang, D. Guo and J. Wang, *Org. Chem. Front.*, 2022, **9**, 3006-3011.
